# Supplementary material
Source: PubMed Central journal article supplement (PMC3994982)
Supplement: NIHMS560687-supplement-SI.pdf [file NIHMS560687-supplement-SI.pdf]

Supporting Information

**Photochemistry of Furyl- and Thienyldiazomethanes:  
Spectroscopic Characterization of Triplet 3-Thienylcarbene**

Caroline R. Pharr,<sup>†,1</sup> Laura A. Kopff,<sup>†</sup>

Brian Bennett,<sup>‡</sup> Scott A. Reid,<sup>§</sup> and Robert J. McMahon<sup>†,\*</sup>

<sup>†</sup> Department of Chemistry, University of Wisconsin–Madison, 1101 University Avenue,  
Madison, Wisconsin, 53706-1322, United States

<sup>‡</sup> National Biomedical EPR Center, Department of Biophysics, Medical College of Wisconsin,  
8701 Watertown Plank Road, Milwaukee, Wisconsin 53226-0509, United States

<sup>§</sup> Department of Chemistry, Marquette University, 535 North 14<sup>th</sup> Street, Milwaukee,  
Wisconsin 53201-1881, United States

E-mail: mcmahon@chem.wisc.edu

|                                                                                                                       |        |
|-----------------------------------------------------------------------------------------------------------------------|--------|
| Details concerning matrix isolation spectroscopy .....                                                                | 2      |
| Photochemistry derived from (3-thienyl)diazomethane ( <b>1</b> ).....                                                 | 3-4    |
| Photochemistry derived from (3-furyl)diazomethane ( <b>3</b> ).....                                                   | 5      |
| Computed electronic absorption spectrum of (3-thienyl)diazomethane ( <b>1</b> ) .....                                 | 6-7    |
| Computed spin densities for triplet 2-thienylcarbene ( <b>11</b> ) and 2-furylcarbene ( <b>22</b> ) .....             | 8      |
| Literature cited.....                                                                                                 | 8-9    |
| Complete literature citation for reference 69 .....                                                                   | 9      |
| <b>Figures S1-S20.</b> Photochemistry of <b>1</b> , <b>2</b> , <b>3</b> , and <b>4</b> (IR, UV/vis, EPR spectra)..... | 10-31  |
| <b>Tables S.3-S.71.</b> Cartesian coordinates and absolute energies for computed structures .....                     | 32-67  |
| <b>Tables S.72-S.140.</b> Computed harmonic vibrational frequencies and IR intensities.....                           | 68-136 |

---

<sup>1</sup> Present address: Department of Chemistry, Carroll College, 1601 North Benton Ave, Helena, MT 59625

**Matrix Isolation Spectroscopy.** The matrix isolation apparatus and technique has been described previously.<sup>1,2</sup> Irradiation was carried out with an ILC Technology LX300UV 300 W high-pressure xenon arc lamp, and wavelength selection was achieved with cut-off filters ( $\lambda > 613$  nm, Corning 2-58;  $\lambda > 497$  nm, Corning 3-69;  $\lambda > 472$  nm, Corning 3-71;  $\lambda > 444$  nm, Corning 3-72;  $\lambda > 399$  nm, Corning 3-74;  $\lambda > 363$  nm, Corning 3-075;  $\lambda > 330$  nm, Corning 3-28;  $\lambda > 300$  nm, Schott WG 320;  $\lambda > 280$  nm, Pyrex;  $\lambda > 261$  nm; Corning 0-53;  $\lambda > 237$  nm, Corning 0-56) or a Spectral Energy GM 252 monochromator (bandpass of 20 nm). IR spectra were recorded on a Nicolet Nexus™ 870 FT-IR spectrometer equipped with a DTGS detector at a resolution of 2 cm<sup>-1</sup>. UV/vis spectra were recorded with a Varian Cary 5000 UV/vis/NIR spectrophotometer utilizing a spectral bandwidth of 1.0 nm. EPR spectra were obtained on a Bruker ESP 300 spectrometer with a Bruker ER 042 MRH E microwave bridge and an EIP Model 625A microwave frequency counter. Zero-field splitting parameters were determined by a best fit of the observed spectrum to the spin Hamiltonian (assuming  $g_x = g_y = g_z = g_e$ ).<sup>3</sup>

**EPR Experiments in Organic Glasses.** The diazo compound was prepared by thermolysis of the tosylhydrazone sodium salt in the usual manner. The diazo compound was rinsed from the cold finger with 3-methylpentane. The UV/vis spectrum of the solution was measured in order to determine the concentration of diazo compound. Solutions for EPR measurement were prepared by diluting the stock solution to ca. 1-5 mM. The solution was introduced into a quartz EPR sample tube, purged with Ar, subjected to four freeze-pump-thaw cycles, and the tube was flame-sealed under vacuum. Under a wide variety of photolysis conditions, irradiation of 3-thienyldiazomethane (**1**) afforded an extremely weak EPR spectrum in which only the strongest  $Z_1$  transition of triplet 3-thienylcarbene (**13**) was observable at 4.2 K.

### Photochemistry derived from (3-thienyl)diazomethane (**1**).

Efforts at elucidating the photochemistry of 1*H*-2-thiabicyclo[3.1.0]hexa-3,5-diene (**12**) were attempted by using a monochromator to irradiate at various wavelengths between 350 and 250 nm. Irradiation was carried out in incremental 20 nm steps from 350 to 250 nm. The experiment was begun with broad-band irradiation ( $\lambda > 534$  nm) of 3-thienyldiazomethane (**1**) to give a mixture of triplet 3-thienylcarbene (**13**), 1*H*-2-thiabicyclo[3.1.0]hexa-3,5-diene (**12**), and (*s*-*Z*)- $\alpha$ -thial methylenecyclopropene (**9**), and residual **1**. The matrix was then selectively irradiated at  $\lambda = 467$  nm with a monochromator to drive away carbene **13**. After this photochemical transformation was complete, irradiation of a matrix containing **1**, **12**, and **9** at  $\lambda = 350$  nm was begun. Interestingly, irradiation at this wavelength causes **1**, **13** and (*s*-*E*) **9** to grow into the matrix while **12** and (*s*-*Z*) **9** disappear (Figure S7). The growth of (*s*-*E*) **9** was to be expected, as a decrease in (*s*-*Z*) **9** and the corresponding growth of (*s*-*E*) **9** is observed upon broadband irradiation of the matrix at similar wavelengths. The growth of **1**, however, was surprising to us, and we considered the possibility that the minor product in the matrix was not **12**, but rather resulted from a rearrangement of diazo compound **1** to give an alternate structure such as (3-thienyl)diazirine (**34**), 6*aH*-thieno[2,3-*c*]pyrazole (**35**), or H shift products of 6*aH*-thieno[2,3-*c*]pyrazole (**36** and **37**) (Scheme S1).

**Scheme S1.** Suspected products from an intramolecular photochemical reaction of (3-thienyl)diazomethane (**1**) and their computed relative energies.<sup>a</sup>

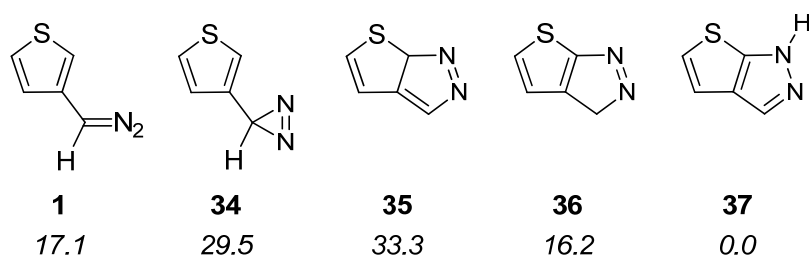

<sup>a</sup> Energy (kcal/mol; ZPVE included). B3LYP/6-31G\* level of theory.

The computed spectra of these compounds display poor agreement with the experimentally observed bands. The irradiation conditions were repeated to verify these results and the spectra was reproduced. Further irradiation became markedly more complicated due to the number of species present in the matrix and was not helpful in providing evidence to support a positive identification of the compound of interest (currently assigned as **12**). We are left then, in agreement with Albers and Sander,<sup>4</sup> tentatively assigning **12** to 1*H*-2-thiabicyclo[3.1.0]hexa-3,5-diene. It is conceivable that **12** photochemically reverts back to carbene **13**, which in an excited state could react with nitrogen in the matrix to regenerate the starting material **1**.

### Photochemistry derived from (3-furyl)diazomethane (**3**).

An unidentified intermediate (**U**, 3429 m, 1636 m, 1476 m  $\text{cm}^{-1}$ , Figure S16), likely a  $\text{C}_5\text{H}_4\text{O}$  isomer, was observed during the photolysis of (3-furyl)diazomethane (**3**). In addition to the structures depicted in Scheme 3 of the manuscript, we also considered the structures depicted in Scheme S2, but none of the computed IR spectra shows a good correlation with the experimentally observed bands of intermediate **U**.

**Scheme S2.** Additional  $\text{C}_5\text{H}_4\text{O}$  isomers considered as possible photoproducts from (3-furyl)diazomethane (**3**).

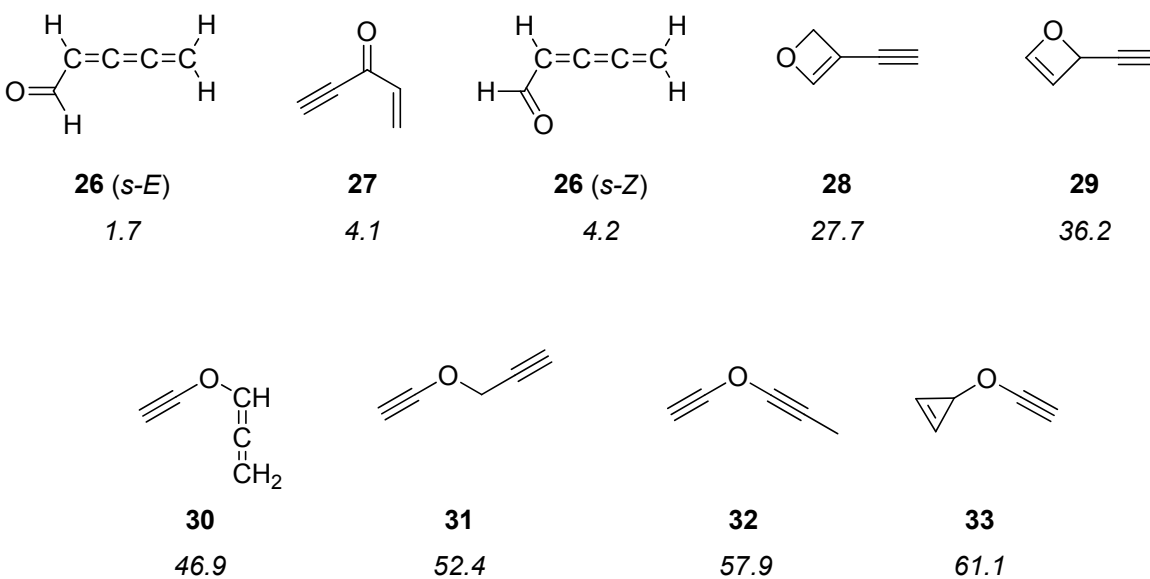

## Computed Electronic Absorption Spectrum of 3-Thienyldiazomethane (1).

EPR experiments on triplet 3-thienylcarbene (**13**) reveal a wavelength dependence in the photolysis of 3-thienyldiazomethane (**1**) (Figure 1 and S8). Knowing that the conformational isomers of singlet arylhalocarbenes exhibit distinct differences in their electronic absorption spectra,<sup>5-9</sup> we wondered if the same might be true for the conformers of 3-thienyldiazomethane (**1**). TD-DFT calculations suggest that this is not the case for the visible absorption (Table S.1), which is the region of the spectrum where the wavelength dependence was observed. The only notable difference between the computed absorption spectra of the conformers of **1** involves the oscillator strength of the UV absorption near 245 nm. The computed transitions exhibit modest agreement with the experimental spectrum of 3-thienyldiazomethane (**1**).

It is worth noting that, because of a change in the priority of the substituents involved in naming the compounds, the (*s-Z*) conformer of diazo compound **1** correlates with the (*s-E*) conformer of carbene **13**, and vice versa (Scheme S3).

**Scheme S3.** Conformational isomers of Diazo Compounds and Carbenes.

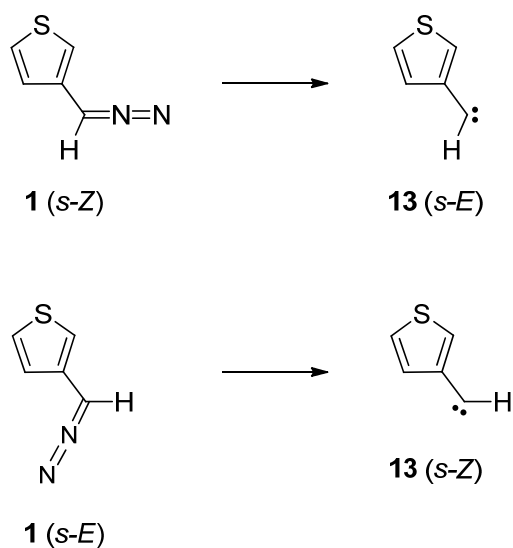

**Table S.1.** Computed Electronic Absorption Spectra of Diazo Compounds.<sup>a</sup>

| <i>(s-Z)</i> -3-thienyl<br>diazomethane ( <b>1</b> ) |        | <i>(s-E)</i> -3-thienyl<br>diazomethane ( <b>1</b> ) |        | 3-thienyl<br>diazomethane ( <b>1</b> )<br>(expt; N <sub>2</sub> , 10 K) | phenyl<br>diazomethane |        | phenyl<br>diazomethane<br>(expt) |
|------------------------------------------------------|--------|------------------------------------------------------|--------|-------------------------------------------------------------------------|------------------------|--------|----------------------------------|
| $\lambda_{\max}$                                     | $f$    | $\lambda_{\max}$                                     | $f$    | $\lambda_{\max}$                                                        | $\lambda_{\max}$       | $f$    | $\lambda_{\max}$                 |
| 519.5                                                | 0.0001 | 520.0                                                | 0.0001 | 494 <sup>b</sup>                                                        | 508.9                  | 0.0000 | 490 <sup>c,d</sup>               |
| 312.0                                                | 0.0001 | 314.5                                                | 0.0000 |                                                                         | 305.3                  | 0.0001 |                                  |
| 289.1                                                | 0.1450 | 291.0                                                | 0.0004 | 302 sh                                                                  | 285.2                  | 0.0440 |                                  |
| 285.8                                                | 0.0032 | 283.9                                                | 0.1368 | 289                                                                     | 283.8                  | 0.0001 |                                  |
| 282.4                                                | 0.0008 | 279.5                                                | 0.0006 |                                                                         | 276.9                  | 0.0018 |                                  |
| 267.4                                                | 0.0001 | 266.8                                                | 0.0009 |                                                                         | 272.2                  | 0.3992 | 275 <sup>c,e</sup>               |
| 261.0                                                | 0.0002 | 264.3                                                | 0.0703 | 256                                                                     | 256.8                  | 0.0152 |                                  |
| 258.9                                                | 0.0315 | 263.8                                                | 0.0052 |                                                                         | 254.4                  | 0.0006 |                                  |
| 248.0                                                | 0.0063 | 250.0                                                | 0.0002 | 232 sh                                                                  | 252.9                  | 0.0044 |                                  |
| 245.3                                                | 0.0533 | 246.0                                                | 0.2087 | 227                                                                     | 247.0                  | 0.0013 |                                  |
| 237.7                                                | 0.0011 | 238.7                                                | 0.0003 |                                                                         | 234.4                  | 0.0008 |                                  |
| 235.8                                                | 0.0008 | 233.8                                                | 0.0000 |                                                                         | 230.2                  | 0.0004 |                                  |
| 231.7                                                | 0.0003 | 231.3                                                | 0.0006 |                                                                         | 226.2                  | 0.0001 |                                  |
| 228.1                                                | 0.0000 | 227.8                                                | 0.0004 |                                                                         | 223.4                  | 0.0894 | 229 <sup>e</sup>                 |
| 227.8                                                | 0.0030 | 227.0                                                | 0.0065 |                                                                         | 218.6                  | 0.0006 |                                  |

<sup>a</sup> (TD)M06/aug-cc-pVTZ // B3LYP/6-31G\*;  $\lambda_{\max}$  (nm),  $f$  = oscillator strength. Fifteen lowest-energy singlet excitations reported. <sup>b</sup> in CH<sub>3</sub>CN. <sup>c</sup> reference 10. <sup>d</sup> reference 11. <sup>e</sup> reference 12.

**Table S.2.** Natural Spin Densities for Triplet 2-Thienylcarbene (**11**)and Triplet 2-Furylcarbene (**22**).<sup>a</sup>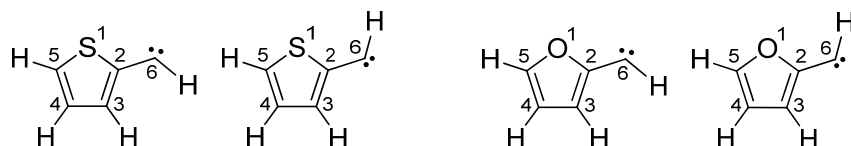

| Atom | 2-thienylcarbene ( <b>11</b> ) |                           | 2-furylcarbene ( <b>22</b> ) |                           |
|------|--------------------------------|---------------------------|------------------------------|---------------------------|
|      | ( <i>s-E</i> )- <b>11</b>      | ( <i>s-Z</i> )- <b>11</b> | ( <i>s-E</i> )- <b>22</b>    | ( <i>s-Z</i> )- <b>22</b> |
| 1    | +0.098                         | +0.146                    | +0.056                       | +0.078                    |
| 2    | -0.203                         | -0.215                    | -0.174                       | -0.176                    |
| 3    | +0.393                         | +0.377                    | +0.390                       | +0.372                    |
| 4    | -0.119                         | -0.124                    | -0.097                       | -0.103                    |
| 5    | +0.314                         | +0.322                    | +0.283                       | +0.291                    |
| 6    | +1.55                          | +1.53                     | +1.58                        | +1.58                     |

<sup>a</sup> NBO spin densities at B3LYP/6-31G\*.**Literature Cited:**

1. "Mechanistic Studies on the Wolff Rearrangement: The Chemistry and Spectroscopy of Some  $\alpha$ -Ketocarbenes" McMahon, R. J.; Chapman, O. L.; Hayes, R. A.; Hess, T. C.; Krimmer, H.-P. *J. Am. Chem. Soc.* **1985**, *107*, 7597-7606.
2. "Photochemistry of Matrix-Isolated Diazoethane and Methyl diazirine - Ethylidene Trapping" Seburg, R. A.; McMahon, R. J. *J. Am. Chem. Soc.* **1992**, *114*, 7183-7189.
3. "ESR of the Triplet States of Randomly Oriented Molecules" Wasserman, E.; Snyder, L. C.; Yager, W. A. *J. Chem. Phys.* **1964**, *41*, 1763-1772.
4. "Photolysis of Diazo(3-thienyl)methane: A Simple Synthesis of a Methylene cyclopropene" Albers, R.; Sander, W. *J. Org. Chem.* **1997**, *62*, 761-764.
5. "Stereochemical Effects in Carbene Photochemistry: 2-Furylchlorocarbene" Khasanova, T.; Sheridan, R. S. *J. Am. Chem. Soc.* **1998**, *120*, 233-234.
6. "Photoselection of Carbene Stereoisomers with Surprisingly Different Electronic Spectra: 3-Furylchlorocarbene" Khasanova, T.; Sheridan, R. S. *Org. Lett.* **1999**, *1*, 1091-1093.



7. "Photochemistry of 2-Benzofurylchlorocarbene: Characterization of a 2,3-Didehydro-2*H*-pyran" Khasanova, T.; Sheridan, R. S. *J. Am. Chem. Soc.* **2000**, *122*, 8585-8586.
8. "Characterization of a Didehydrobenzoxazine Intermediate in a Novel Carbene-to-Carbene Transformation" Nikitina, A.; Sheridan, R. S. *J. Am. Chem. Soc.* **2002**, *124*, 7670-7671.
9. "Geometry and Aromaticity in Highly Strained Heterocyclic Allenes: Characterization of a 2,3-Didehydro-2*H*-thiopyran" Nikitina, A. F.; Sheridan, R. S. *Org. Lett.* **2005**, *7*, 4467-4470.
10. "Carbenoid Formation of Arylcyclopropanes from Olefins, Benzal Bromides, and Organolithium Compounds and from Photolysis of Aryldiazomethanes" Closs, G. L.; Moss, R. A. *J. Am. Chem. Soc.* **1964**, *86*, 4042-4053.
11. "Spectroscopic Characterization of Matrix-Isolated Phenylcarbene and Cycloheptatetraene" Matzinger, S.; Bally, T. *J. Phys. Chem. A* **2000**, *104*, 3544-3552.
12. "1,2,4,6-Cycloheptatetraene: The Key Intermediate in Arylcarbene Interconversions and Related C<sub>7</sub>H<sub>6</sub> Rearrangements" McMahan, R. J.; Abelt, C. J.; Chapman, O. L.; Johnson, J. W.; Kreil, C. L.; LeRoux, J.-P.; Mooring, A. M.; West, P. R. *J. Am. Chem. Soc.* **1987**, *109*, 2456-2469.

**Complete citation to reference 69:**

Frisch, M. J.; Trucks, G. W.; Schlegel, H. B.; Scuseria, G. E.; Robb, M. A.; Cheeseman, J. R.; Scalmani, G.; Barone, V.; Mennucci, B.; Petersson, G. A.; Nakatsuji, H.; Caricato, M.; Li, X.; Hratchian, H. P.; Izmaylov, A. F.; Bloino, J.; Zheng, G.; Sonnenberg, J. L.; Hada, M.; Ehara, M.; Toyota, K.; Fukuda, R.; Hasegawa, J.; Ishida, M.; Nakajima, T.; Honda, Y.; Kitao, O.; Nakai, H.; Vreven, T.; Montgomery, J., J. A.; Peralta, J. E.; Ogliaro, F.; Bearpark, M.; Heyd, J. J.; Brothers, E.; Kudin, K. N.; Staroverov, V. N.; Kobayashi, R.; Normand, J.; Raghavachari, K.; Rendell, A.; Burant, J. C.; Iyengar, S. S.; Tomasi, J.; Cossi, M.; Rega, N.; Millam, N. J.; Klene, M.; Knox, J. E.; Cross, J. B.; Bakken, V.; Adamo, C.; Jaramillo, J.; Gomperts, R.; Stratmann, R. E.; Yazyev, O.; Austin, A. J.; Cammi, R.; Pomelli, C.; Ochterski, J. W.; Martin, R. L.; Morokuma, K.; Zakrzewski, V. G.; Voth, G. A.; Salvador, P.; Dannenberg, J. J.; Dapprich, S.; Daniels, A. D.; Farkas, Ö.; Foresman, J. B.; Ortiz, J. V.; Cioslowski, J.; Fox, D. J. *Gaussian 09; Revision B.1*, 2009.

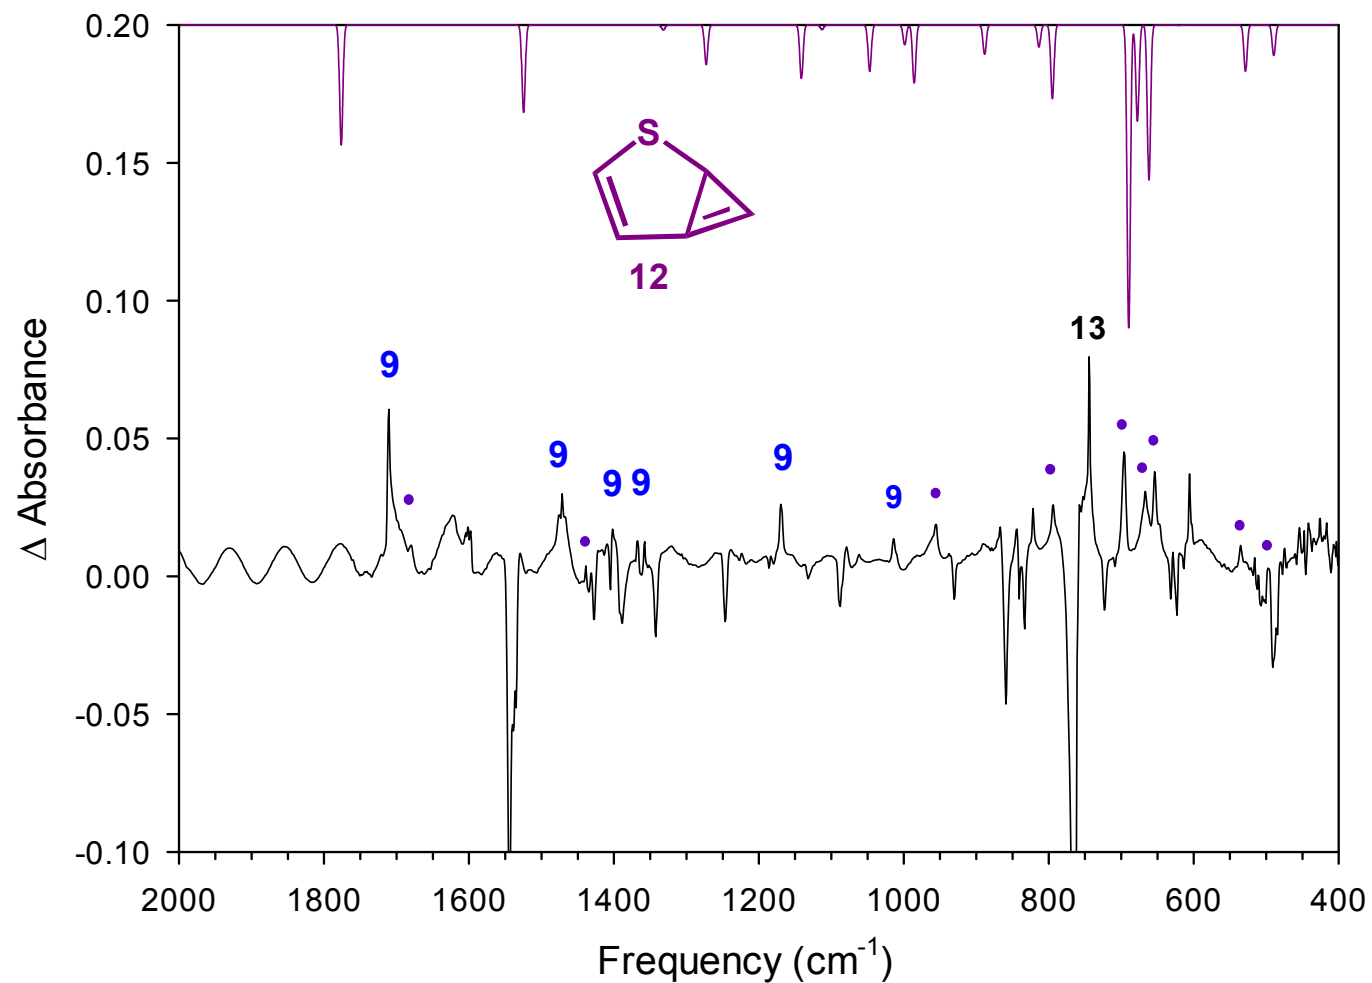

**Figure S1.** IR subtraction spectrum showing spectral changes observed upon irradiation ( $\lambda > 534$  nm, 18 h) of 3-thienyldiazomethane (**1**) ( $\text{N}_2$ , 10 K). The spectrum shows the disappearance of **1** and the growth of bands attributed to 1H-2-thiabicyclo[3.1.0]hexa-3,5-diene (**12**) (marked with purple •). The B3LYP/6-31G\* calculated IR frequencies of **12** can be seen on top of spectrum. (*s-Z*)- $\alpha$ -thial methylenecyclopropene (**9**) and (*s-Z*) and (*s-E*) 3-thienylcarbene (**13**) are also present in the matrix and labeled accordingly.

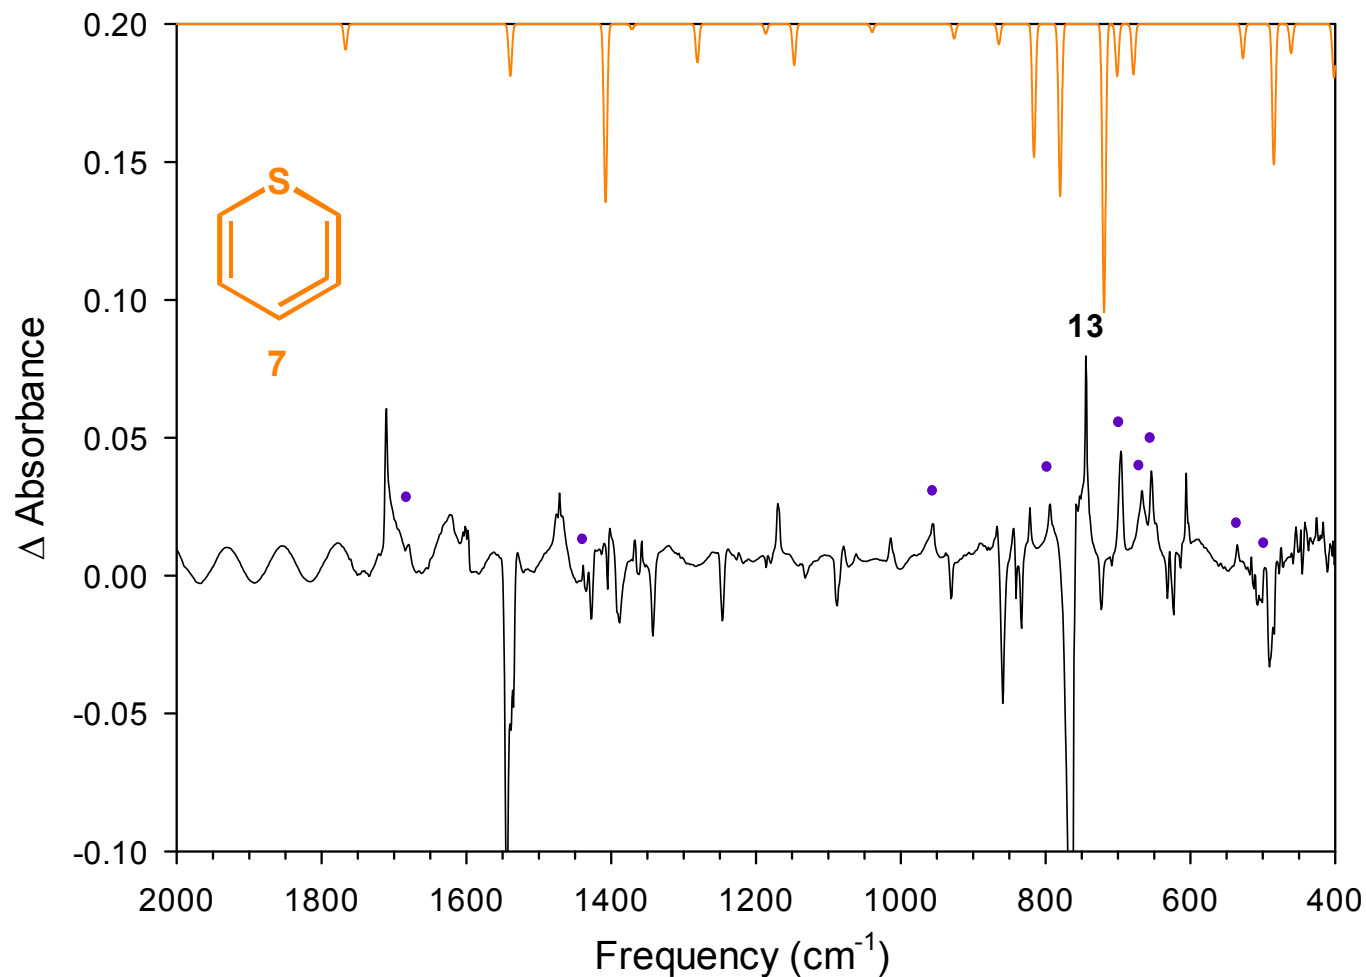

**Figure S2.** IR subtraction spectrum showing spectral changes observed upon irradiation ( $\lambda > 534$  nm, 18 h) of 3-thienyldiazomethane (**1**) ( $\text{N}_2$ , 10 K). The spectrum shows the disappearance of **1** and the growth of bands attributed to 1*H*-2-thiabicyclo[3.1.0]hexa-3,5-diene (**12**) (marked with purple •). The B3LYP/6-31G\* calculated IR frequencies of thiabicyclohexa-2,3,5-triene (**7**), another low lying isomer on the  $\text{C}_5\text{H}_4\text{S}$  potential energy surface can be seen on top of spectrum. The purpose of this spectrum is to illustrate that the experimentally observed bands assigned to **12** do not match up with **7**.

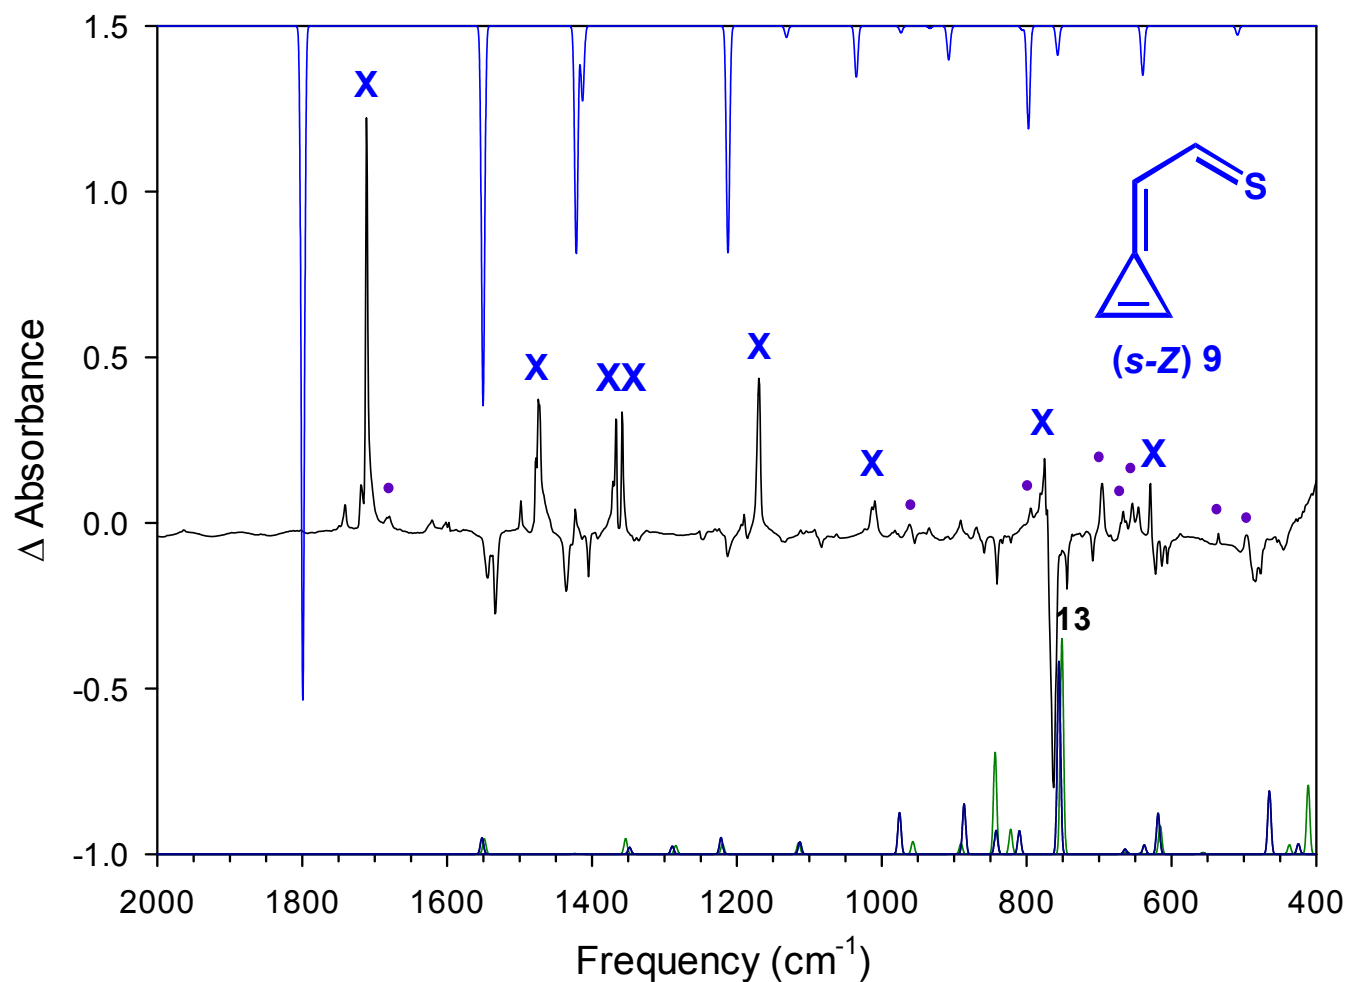

**Figure S3.** IR subtraction spectrum showing spectral changes observed upon irradiation ( $\lambda > 444$  nm, 15 h) of a mixture of 3-thienyldiazomethane (**1**), 1*H*-2-thiabicyclo[3.1.0]hexa-3,5-diene (**12**), (*s*-*Z*)- $\alpha$ -thial methylenecyclopropene (**9**), and 3-thienyl carbene rotamers (**13**) ( $N_2$ , 10 K). The spectrum shows the disappearance of **1** and **13** and the growth of **9** (marked with blue X) and **12** (marked with purple •). B3LYP/6-31G\* calculated IR frequencies for **13** are seen on the bottom of the spectrum, and the major band for **13** is labeled. Calculated IR frequencies for **9** are seen along the top of the spectrum.

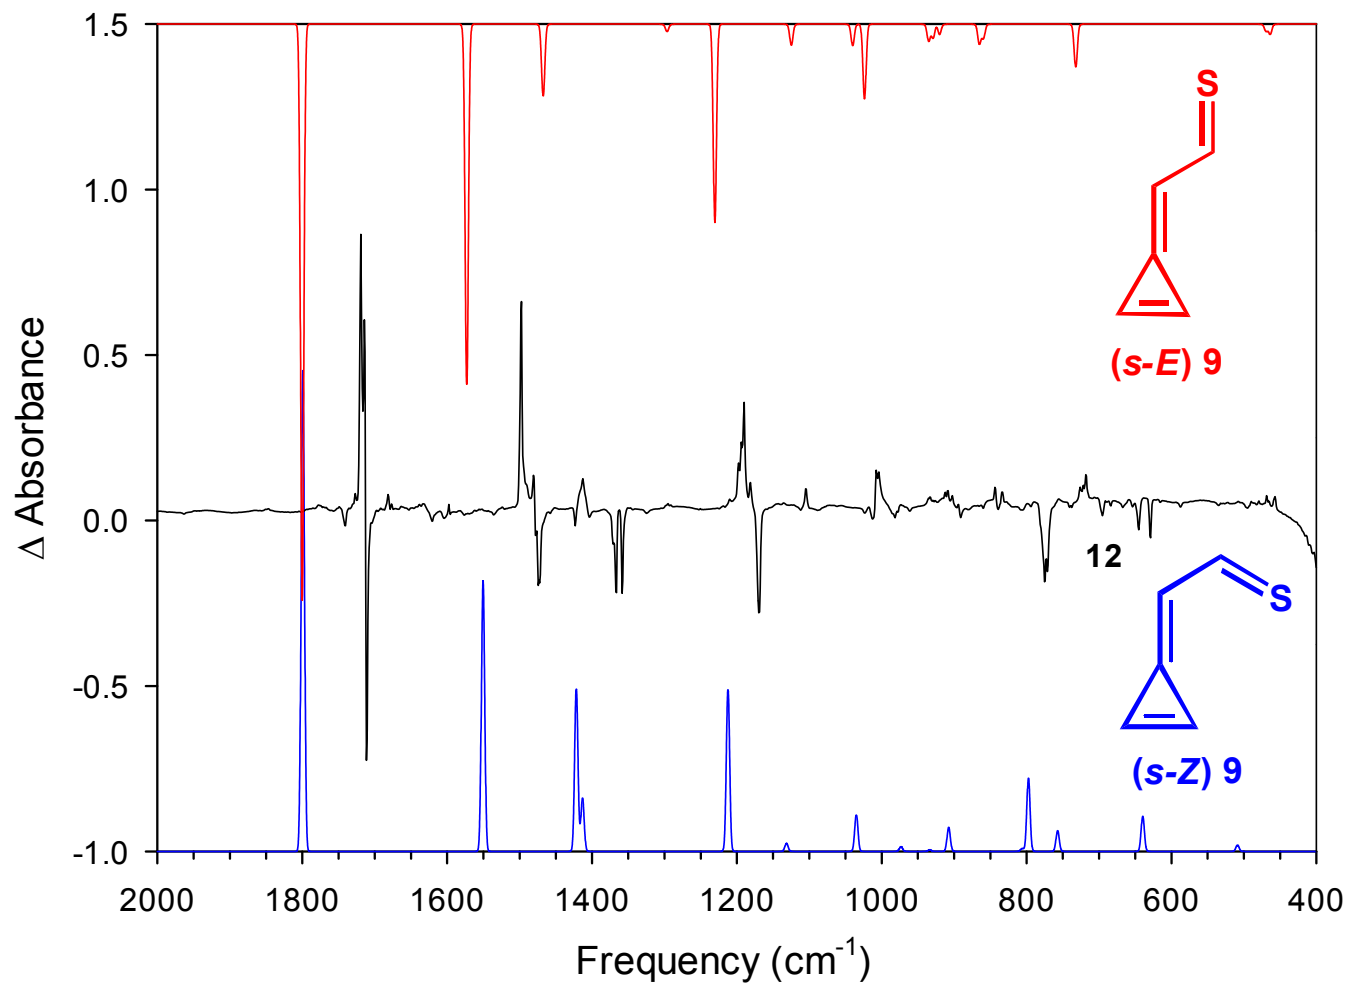

**Figure S4.** IR subtraction spectrum showing spectral changes observed upon irradiation ( $\lambda > 363$  nm, 18 h) of a mixture of a minor amount of 1H-2-thiabicyclo[3.1.0]hexa-3,5-diene (**12**) and *(s-Z)*- $\alpha$ -thial methylenecyclopropene (**9**) ( $\text{N}_2$ , 10 K). The spectrum shows the disappearance of **12**, a decrease in the amount of *(s-Z)* **9**, and the growth of *(s-E)*- $\alpha$ -thial methylenecyclopropene (**9**).

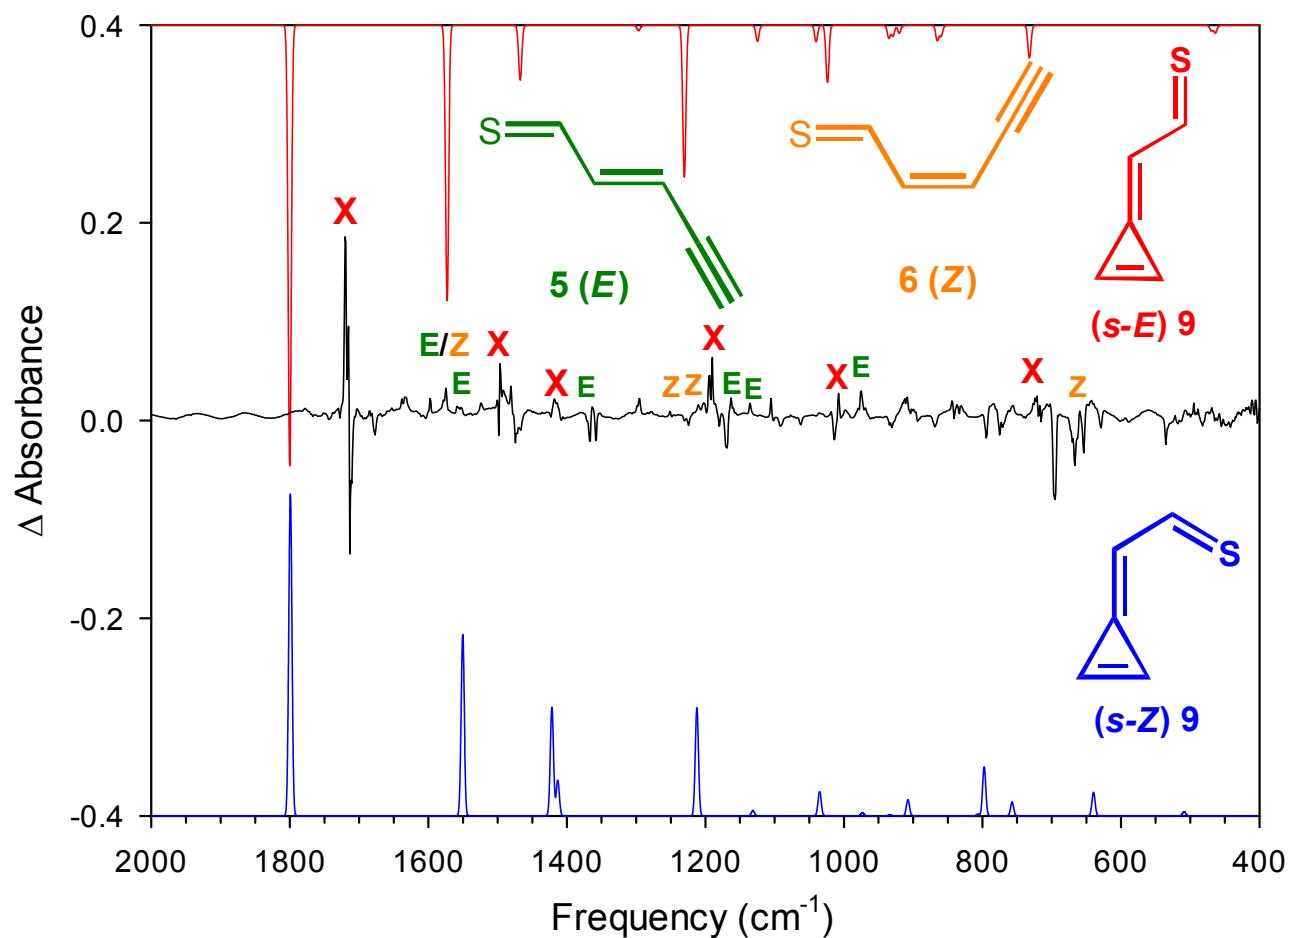

**Figure S5.** IR subtraction spectrum showing spectral changes observed upon irradiation ( $\lambda > 330$  nm, 27 h) of a mixture of (*s-Z*)- and (*s-E*)- $\alpha$ -thial methylenecyclopropene (**9**) ( $N_2$ , 10 K). The spectrum shows further decrease in the amount of (*s-Z*)-**9** and the growth of (*s-E*)-**9** as the major product (marked with red X's). Minor products *E*-pent-2-en-4-ynethial (**5**) and *Z*-pent-2-en-4-ynethial (**6**) are also observed and are labeled accordingly with *E* or *Z*.

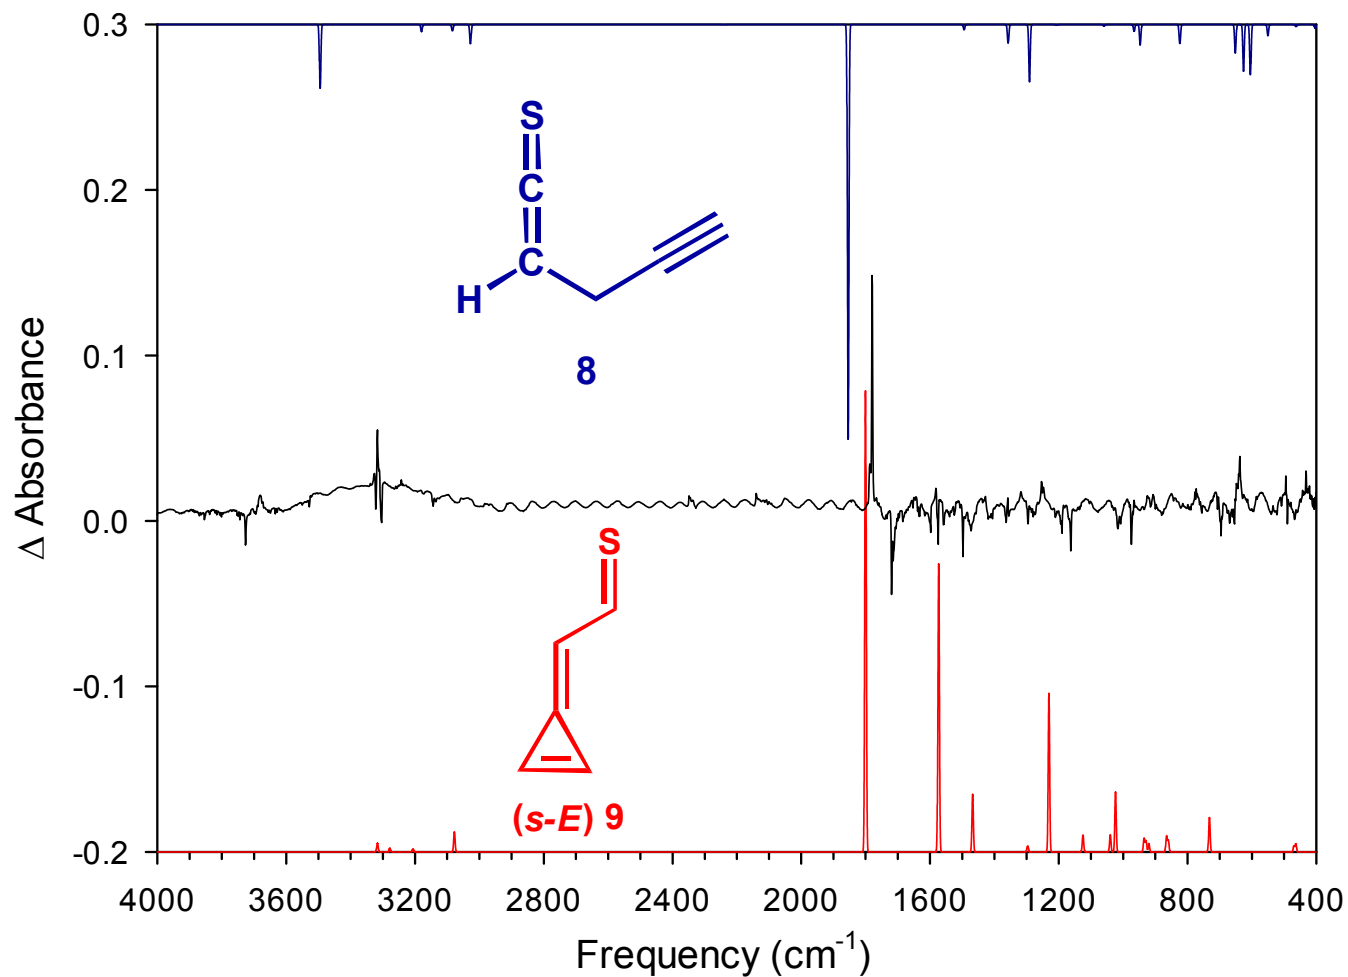

**Figure S6.** IR subtraction spectrum showing spectral changes observed upon irradiation ( $\lambda > 280$  nm, 24 h) of a mixture of (*s-Z*)- and (*s-E*)- $\alpha$ -thial methylenecyclopropene (**9**), and minor amounts of *E*-pent-2-en-4-ynethial (**5**) and *Z*-pent-2-en-4-ynethial (**6**) ( $\text{N}_2$ , 10 K). The spectrum shows decreases in **5**, **6**, and **9** (major) and the growth of propargylthioacetene (**8**).

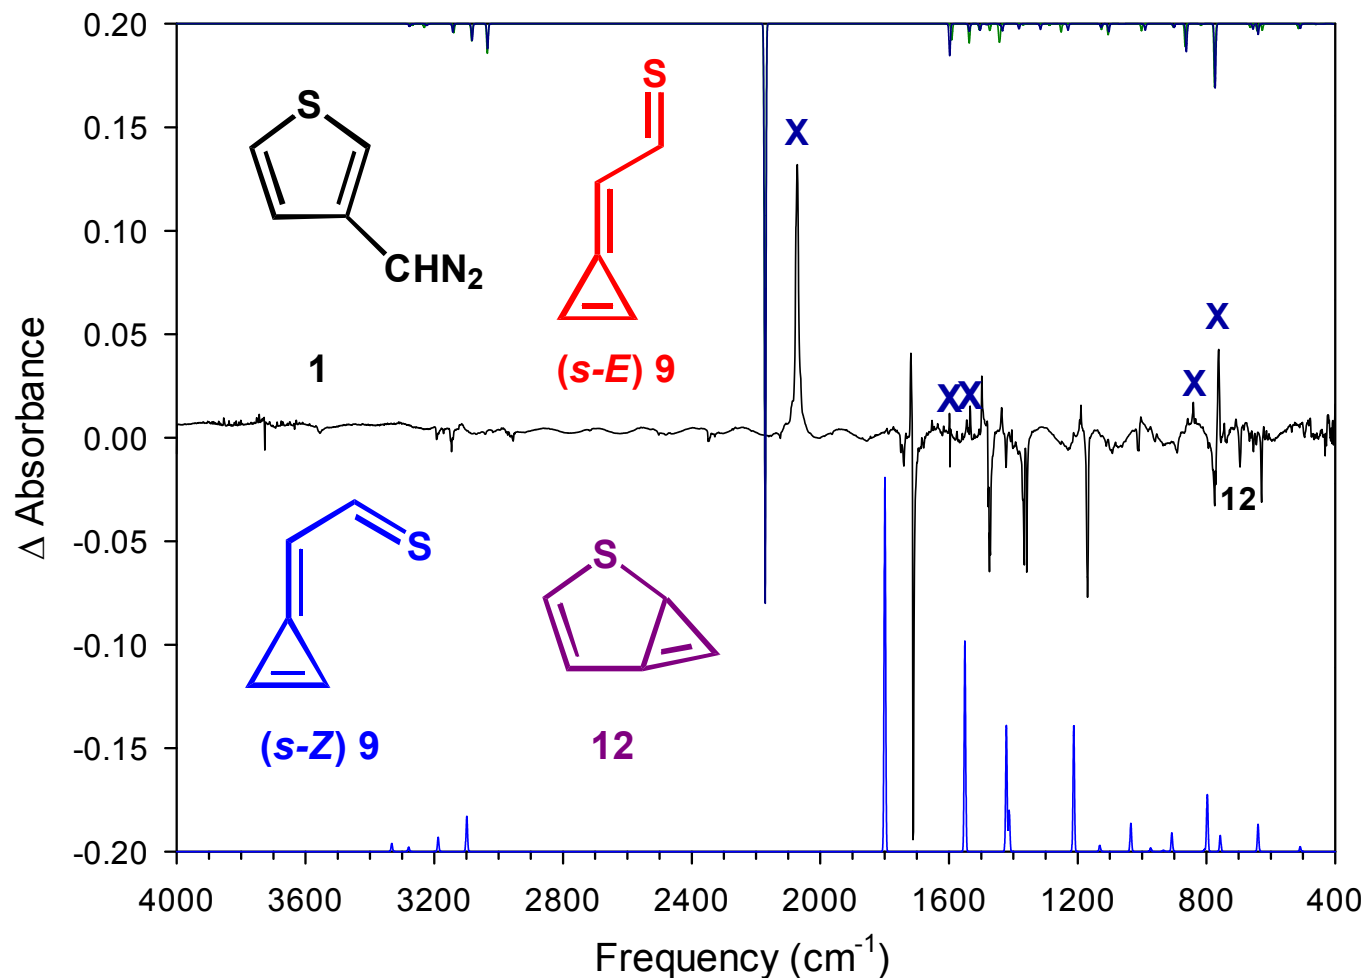

**Figure S7.** IR subtraction spectrum showing spectral changes observed upon irradiation with a monochromator ( $\lambda = 350$  nm, 5.5 h) of a mixture of 3-thienyldiazomethane (**1**), 3-thienylcarbene (**13**), 1H-2-thiabicyclo[3.1.0]hexa-3,5-diene (**12**), (*s-Z*)- and (*s-E*)- $\alpha$ -thial methylenecyclopropene (**9**) ( $\text{N}_2$ , 10 K). The spectrum shows the growth **1** (marked by blue X), a minor amount of **13** (unmarked because of small amount), and (*s-E*)-**9**. A decrease in the amount of **12** and (*s-Z*)-**9** is observed. The B3LYP/6-31G\* calculated IR frequencies of **1** are seen at the top of spectrum. The calculated spectrum of (*s-Z*)-**9** is seen along the bottom of the spectrum.



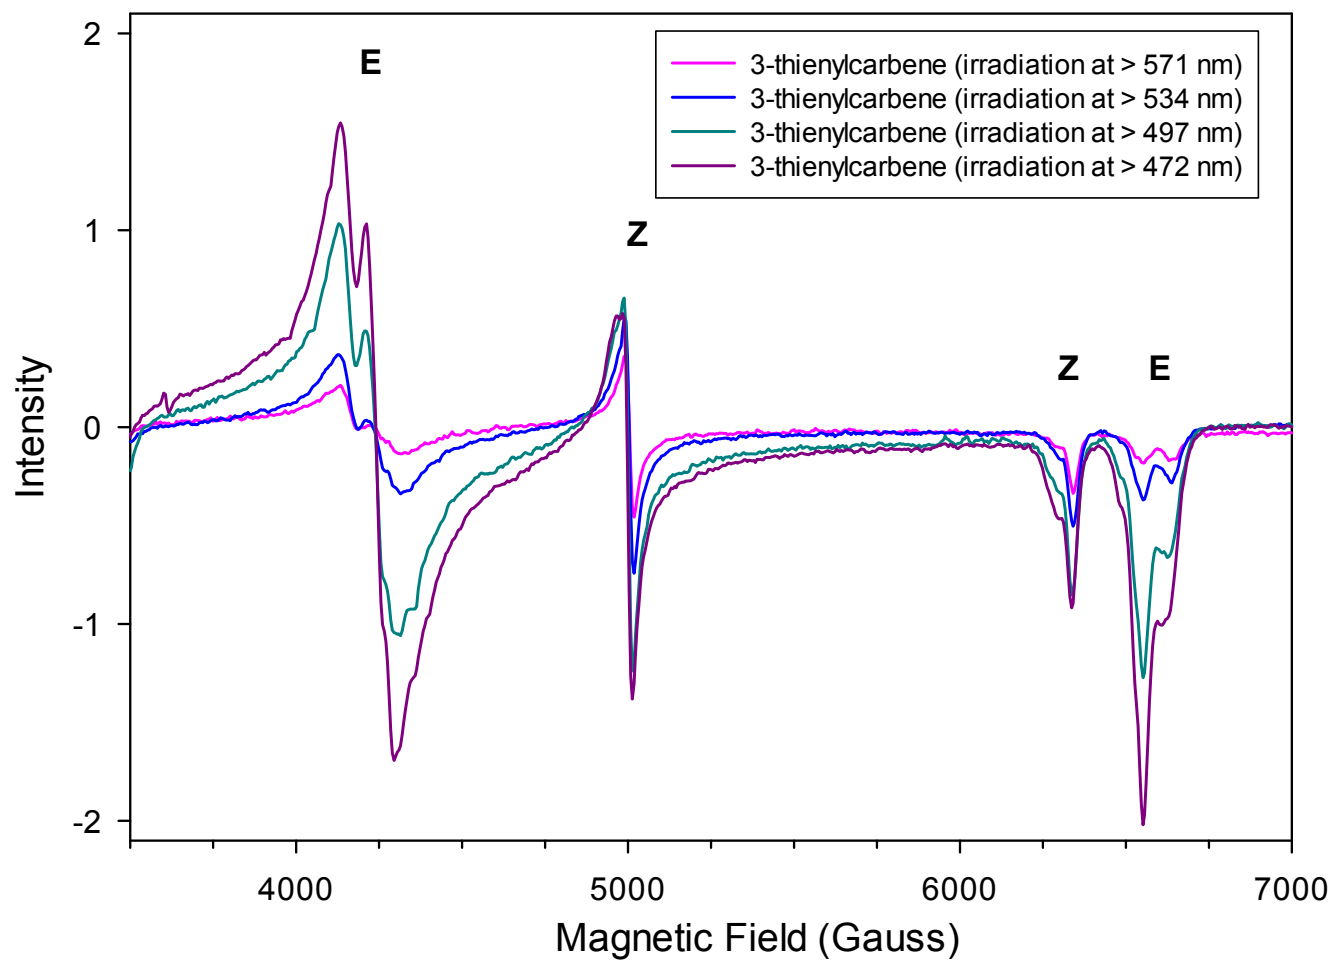

**Figure S8.** EPR spectra of *s-Z* and *s-E* 3-thienylcarbene (**13**) illustrating the wavelength dependence in the photolysis of 3-thienyldiazomethane (**1**) (Ar, 15 K). The *s-Z* conformer is formed in greater proportion upon irradiation at  $\lambda > 571$  nm, while the *s-E* conformer becomes the major photoproduct upon shorter-wavelength irradiation ( $\lambda > 534$ ,  $> 497$ ,  $> 472$  nm). Both rotamers decrease in intensity upon irradiation at  $> 444$  nm (not shown).

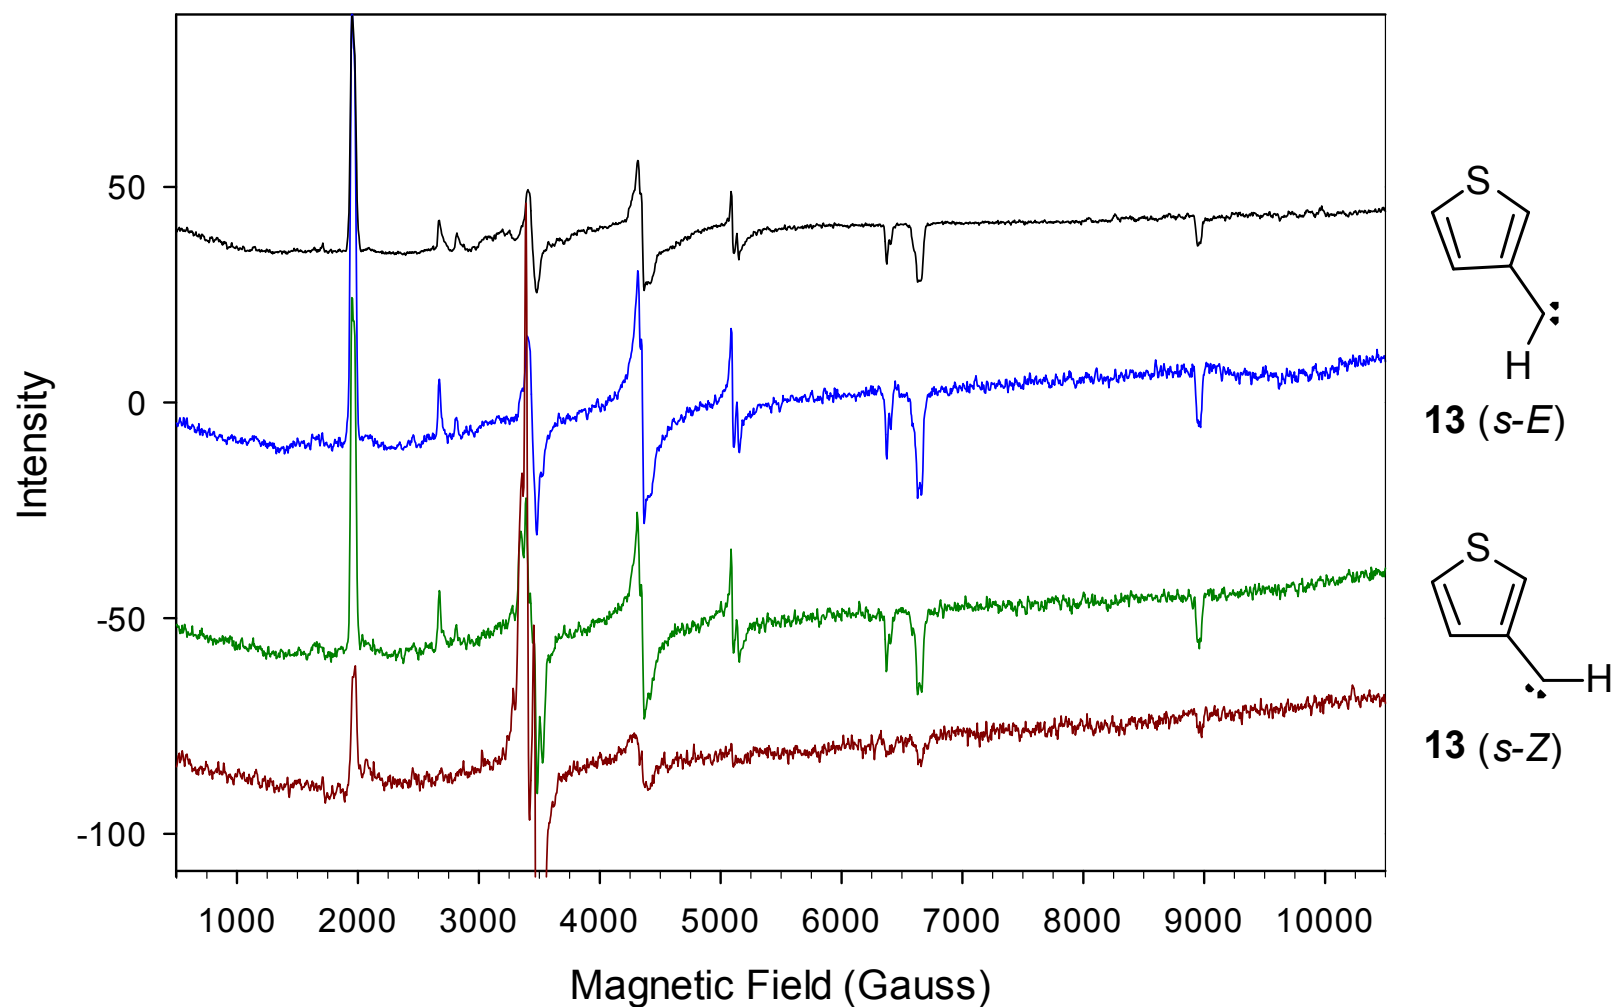

**Figure S9.** EPR spectra of 3-thienylcarbene rotamers (*s-Z* **13** and *s-E* **13**) upon formation and being annealed ( $N_2$ , 15 K). Top (black): 3-thienylcarbene (**13**) after irradiation ( $\lambda > 472$  nm, 17 h) (Receiver Gain =  $1.25 \times 10^4$ ). Second from top (blue): **13** after being annealed to 24 K (Receiver Gain =  $1.00 \times 10^5$ ). Second from bottom (green): **13** after being annealed to 29 K (Receiver Gain =  $1.00 \times 10^5$ ). Bottom (dark red): **13** after being annealed to 35 K (Receiver Gain =  $1.00 \times 10^5$ ).

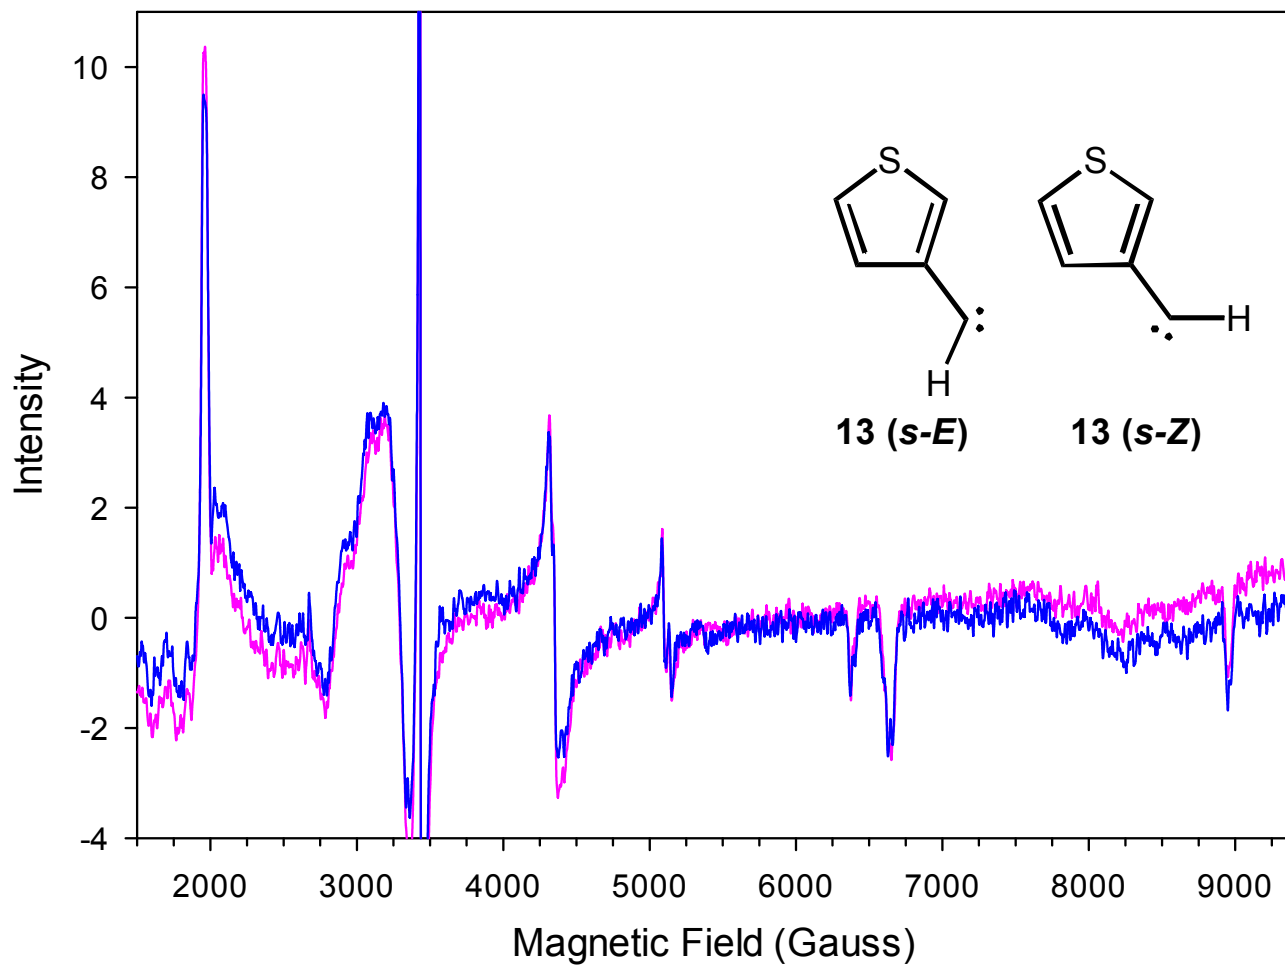

**Figure S10.** Pink: EPR spectrum of *s-Z* and *s-E* 3-thienylcarbene (**13**) formed upon irradiation of (3-thienyl)diazomethane ( $\lambda > 472$  nm, 26 h; Ar, 15 K). Blue: EPR spectrum of *s-Z* and *s-E* 3-thienylcarbene (**13**) after standing in the dark for 46 h. Spectra are on the same scale.

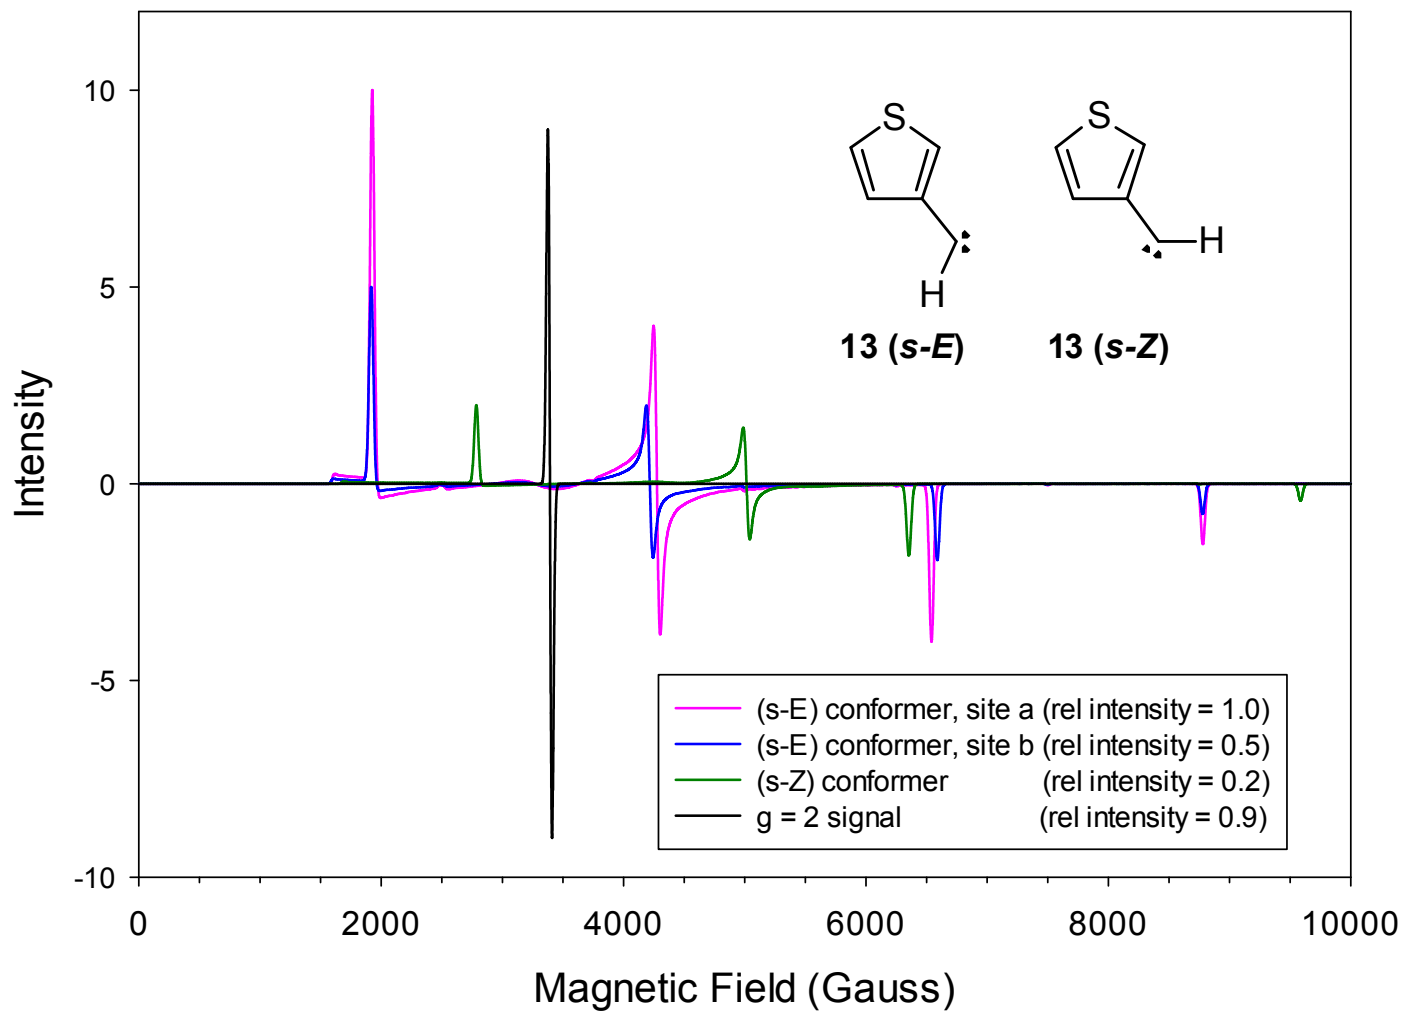

**Figure S10a.** Simulated EPR spectrum of triplet 3-thienylcarbene (**13**) using data from XSophe. Individual components and relative intensities are given in the figure legend.

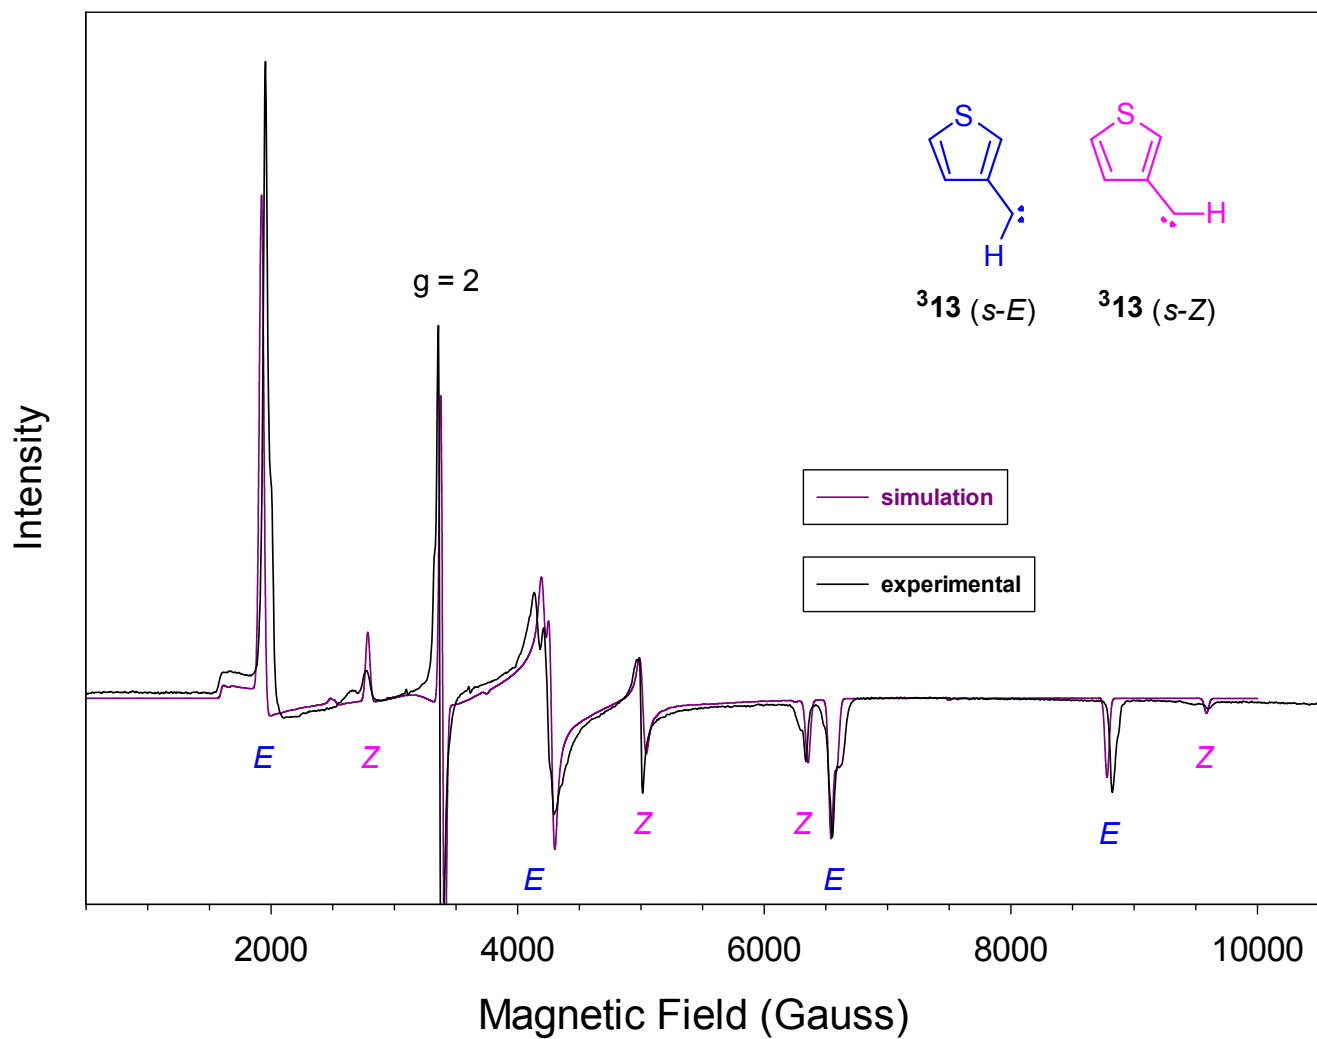

**Figure S10b.** Overlay of experimental and simulated EPR spectra of triplet 3-thienylcarbene (**13**). This figure represents a direct overlay of the spectral data depicted in Figure 5 of the manuscript.

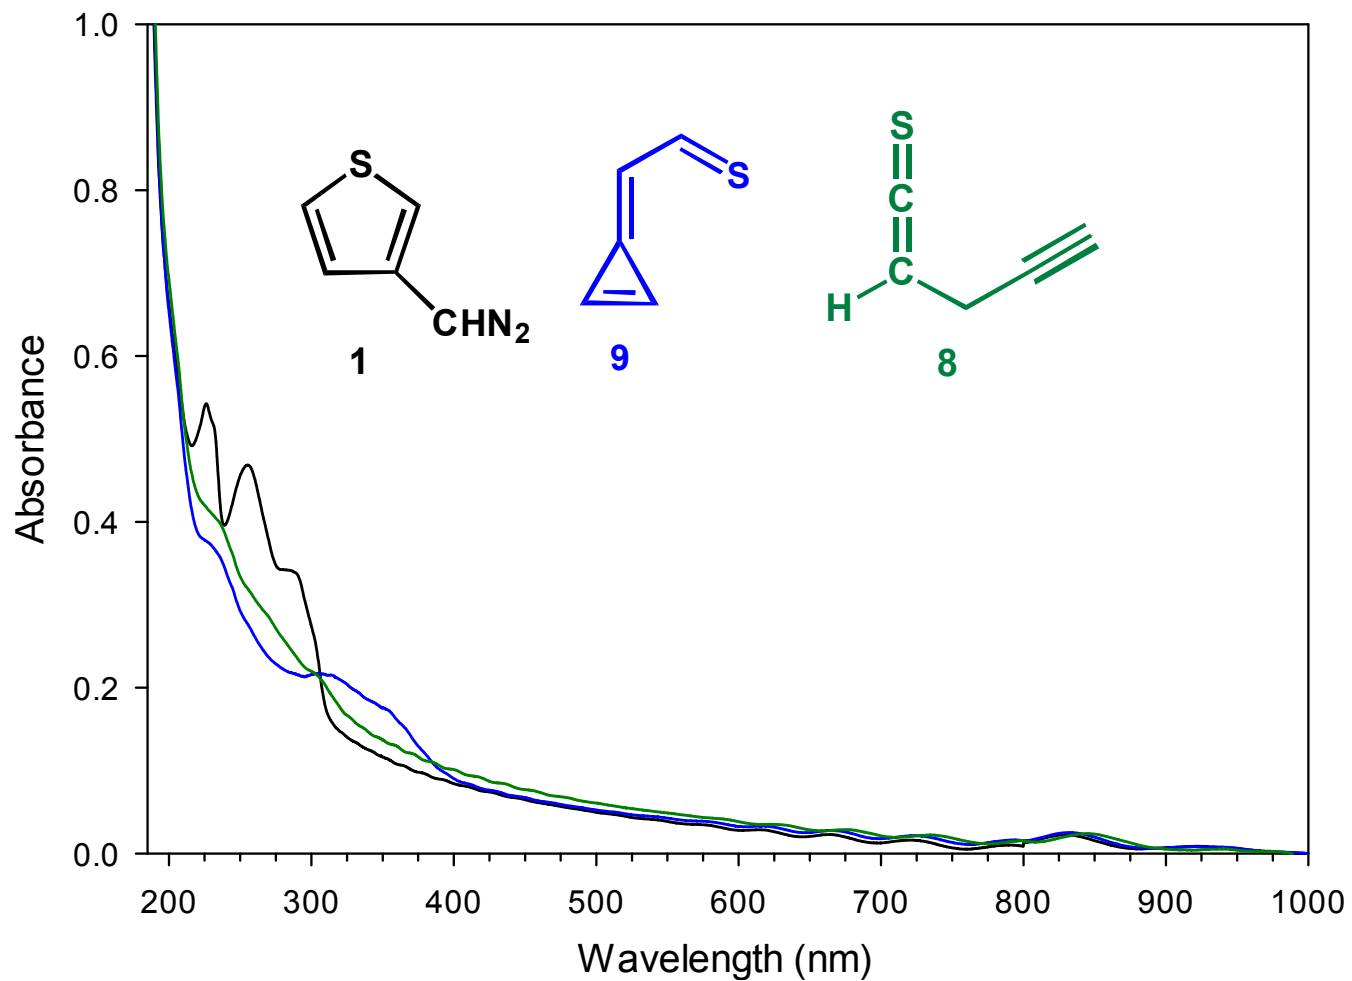

**Figure S11.** UV/vis spectra. **Black:** 3-thienyldiazomethane (**1**) (prior to irradiation; N<sub>2</sub>, 10 K). **Blue:** (*s-Z*)-α-thialmethylene cyclopropene (**9**) (λ > 497 nm, 15 h; N<sub>2</sub>, 10 K). **Green:** propargyl thioketene (**8**) (λ > 280 nm, 24 h; N<sub>2</sub>, 10 K).

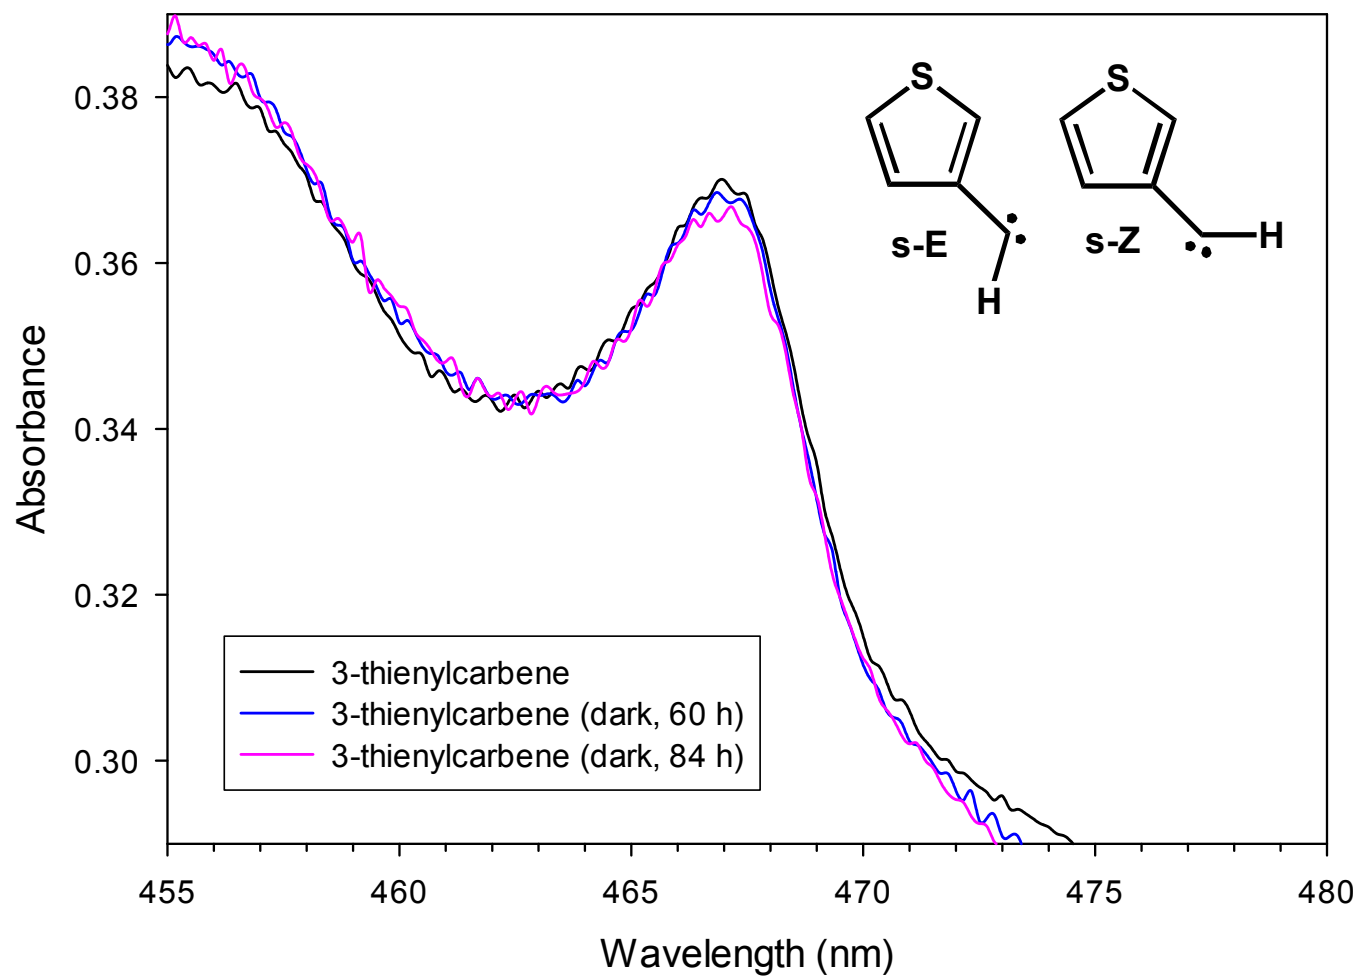

**Figure S12.** Visible spectra. **Black:** *s-Z* and *s-E* triplet 3-thienylcarbene (**13**) after irradiation of 3-thienyldiazomethane (**1**) ( $\lambda > 472$  nm, 26 h; Ar, 15 K). **Blue:** spectrum obtained after standing in the dark for 60 h. **Pink:** spectrum obtained after standing in the dark for 84 h. Spectra are on the same scale.

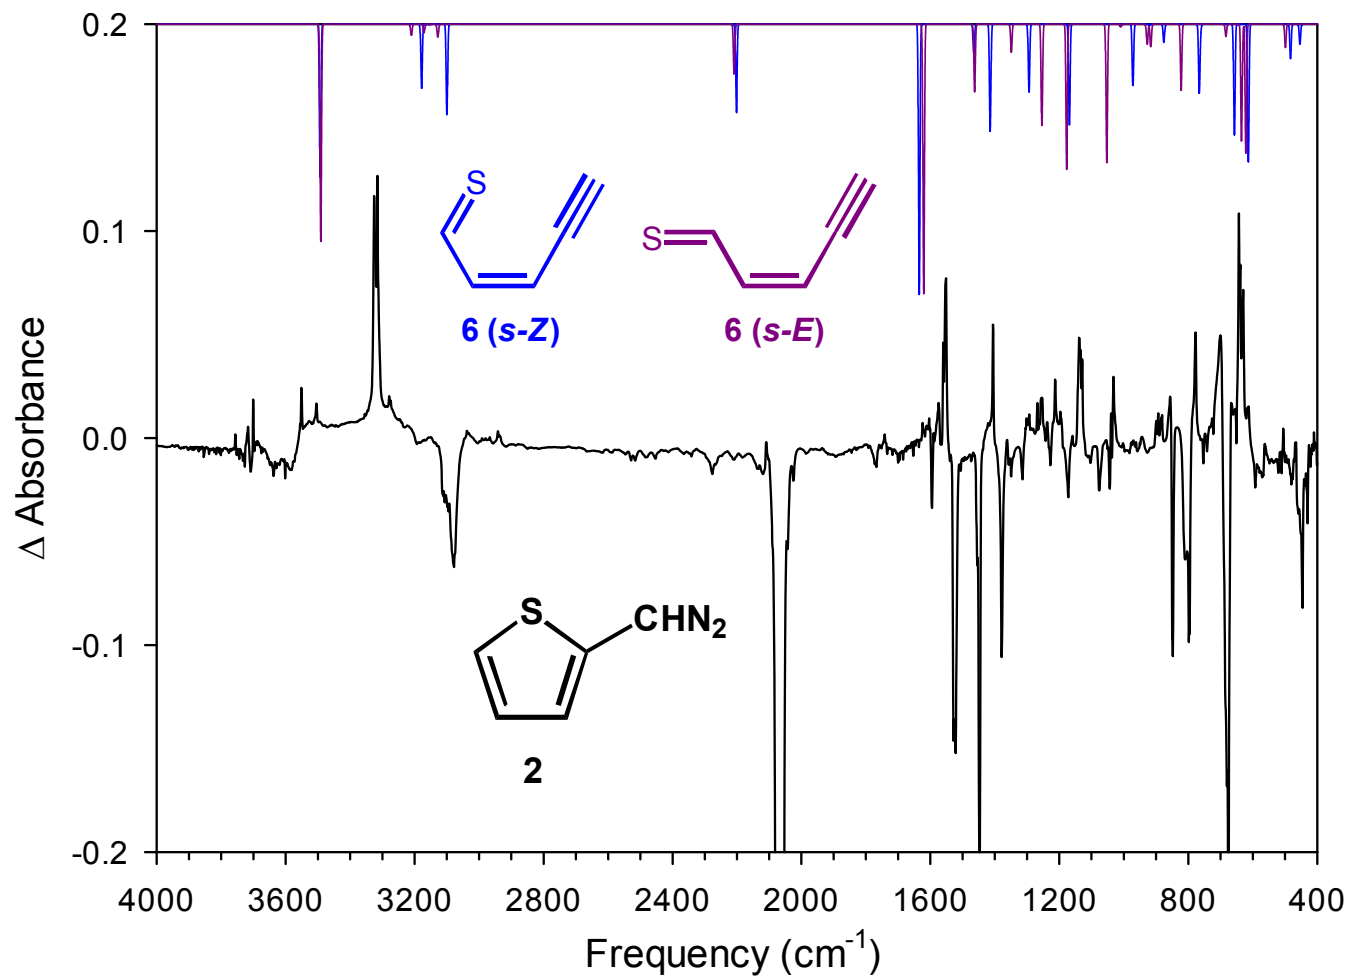

**Figure S13.** IR subtraction spectrum showing spectral changes observed upon irradiation ( $\lambda > 534$  nm, 22 h) of (2-thienyl) diazomethane (**2**) (Ar, 10 K). The spectrum shows the disappearance of **2** and the growth of (*s-Z*) and (*s-E*)-Z-pent-2-en-4-ynethial (**6**).



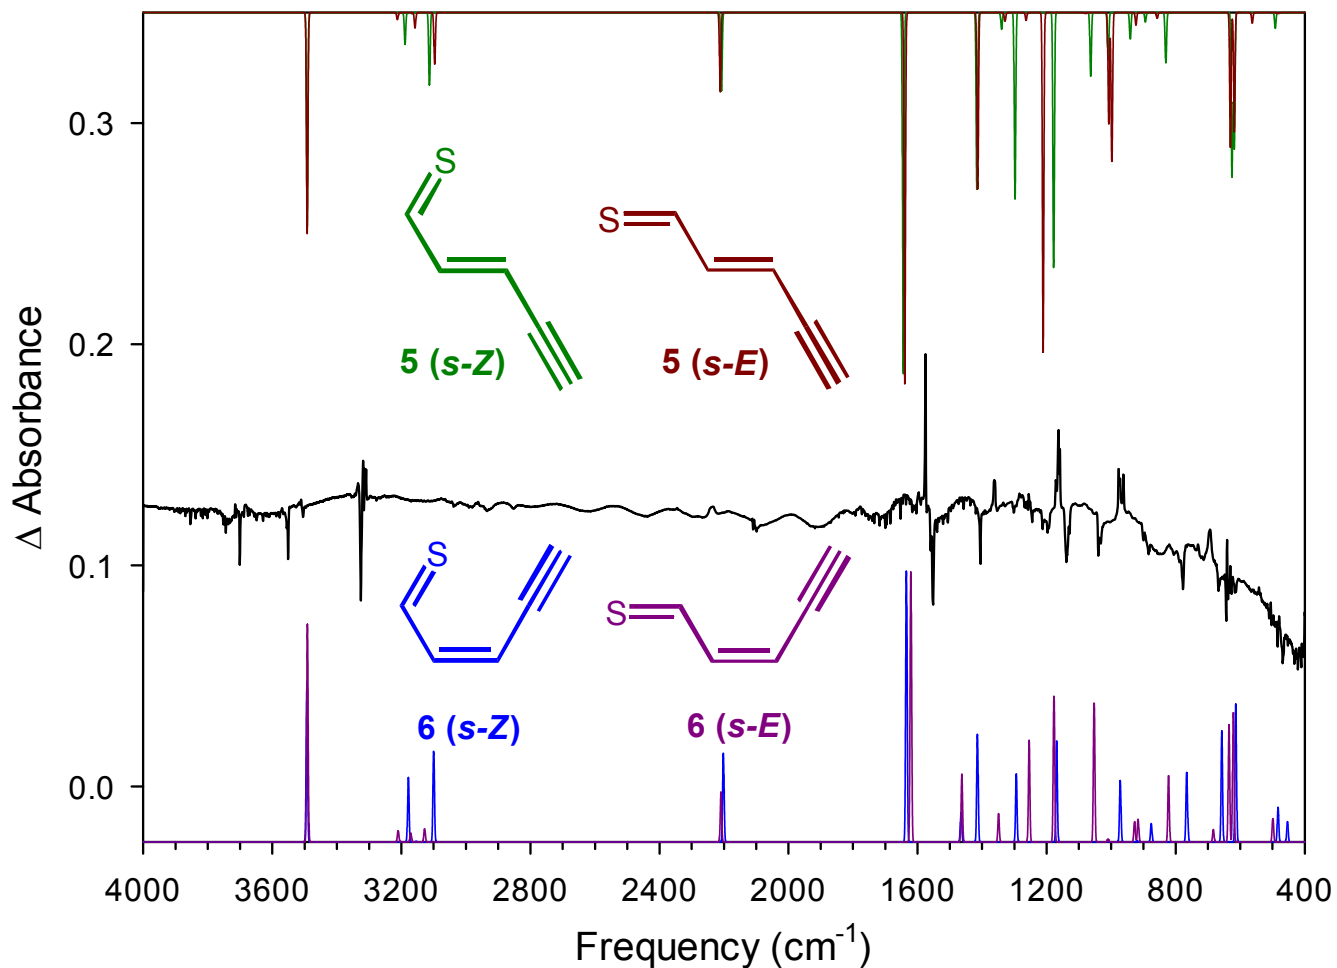

**Figure S14.** IR subtraction spectrum showing spectral changes observed upon irradiation of the matrix shown in Figure S13 ( $\lambda > 363$  nm, 20 h) of *(s-Z)* and *(s-E)-Z-pent-2-en-4-ynethial* (**6**) (Ar, 10 K). The spectrum shows the disappearance of **6** and the growth of *(s-E)-E-pent-2-en-4-ynethial* (**5**). The calculated spectrum of *(s-Z)-E-pent-2-en-4-ynethial* is also shown (green) for comparison purposes.

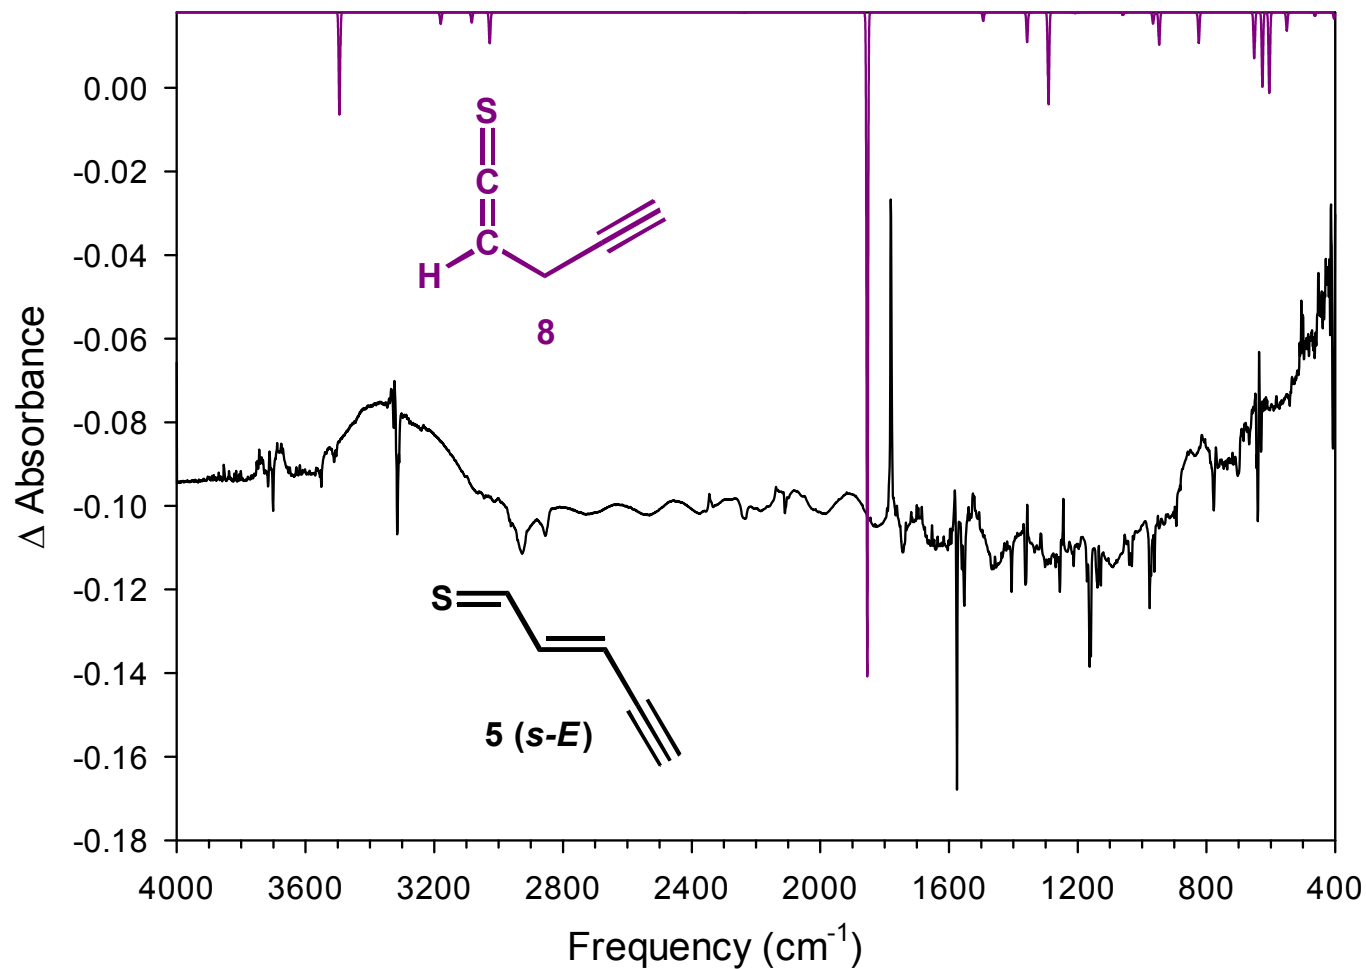

**Figure S15.** IR subtraction spectrum showing spectral changes observed upon irradiation of the matrix shown in Figure S14 ( $\lambda > 237$  nm, 4 h) of *E*-pent-2-en-4-ynethial (**5**) (Ar, 10 K). The spectrum shows the disappearance of (*s-E*)-**5** and the growth of propargyl thioketene (**8**).

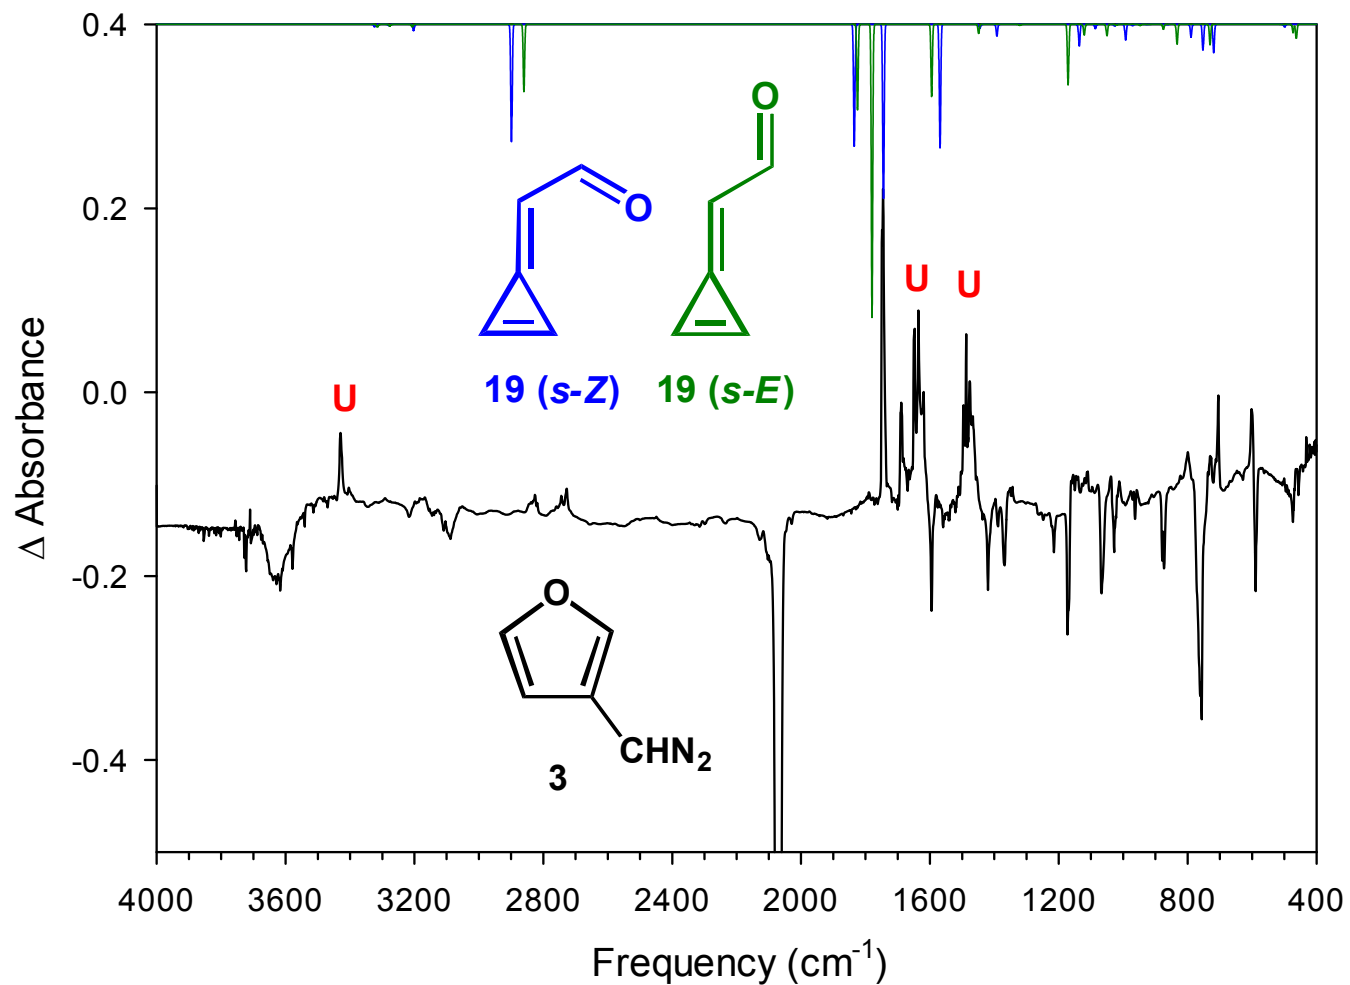

**Figure S16.** IR subtraction spectrum showing spectral changes observed upon irradiation ( $\lambda > 472$  nm, 19 h) of (3-furyl) diazomethane (**3**) (Ar, 10 K). The spectrum shows the disappearance of **3** and the growth of the growth of (*s-Z*) and (*s-E*)-( $\alpha$ -formyl)methylenecyclopropene (**19**) and an unknown species (**U**).

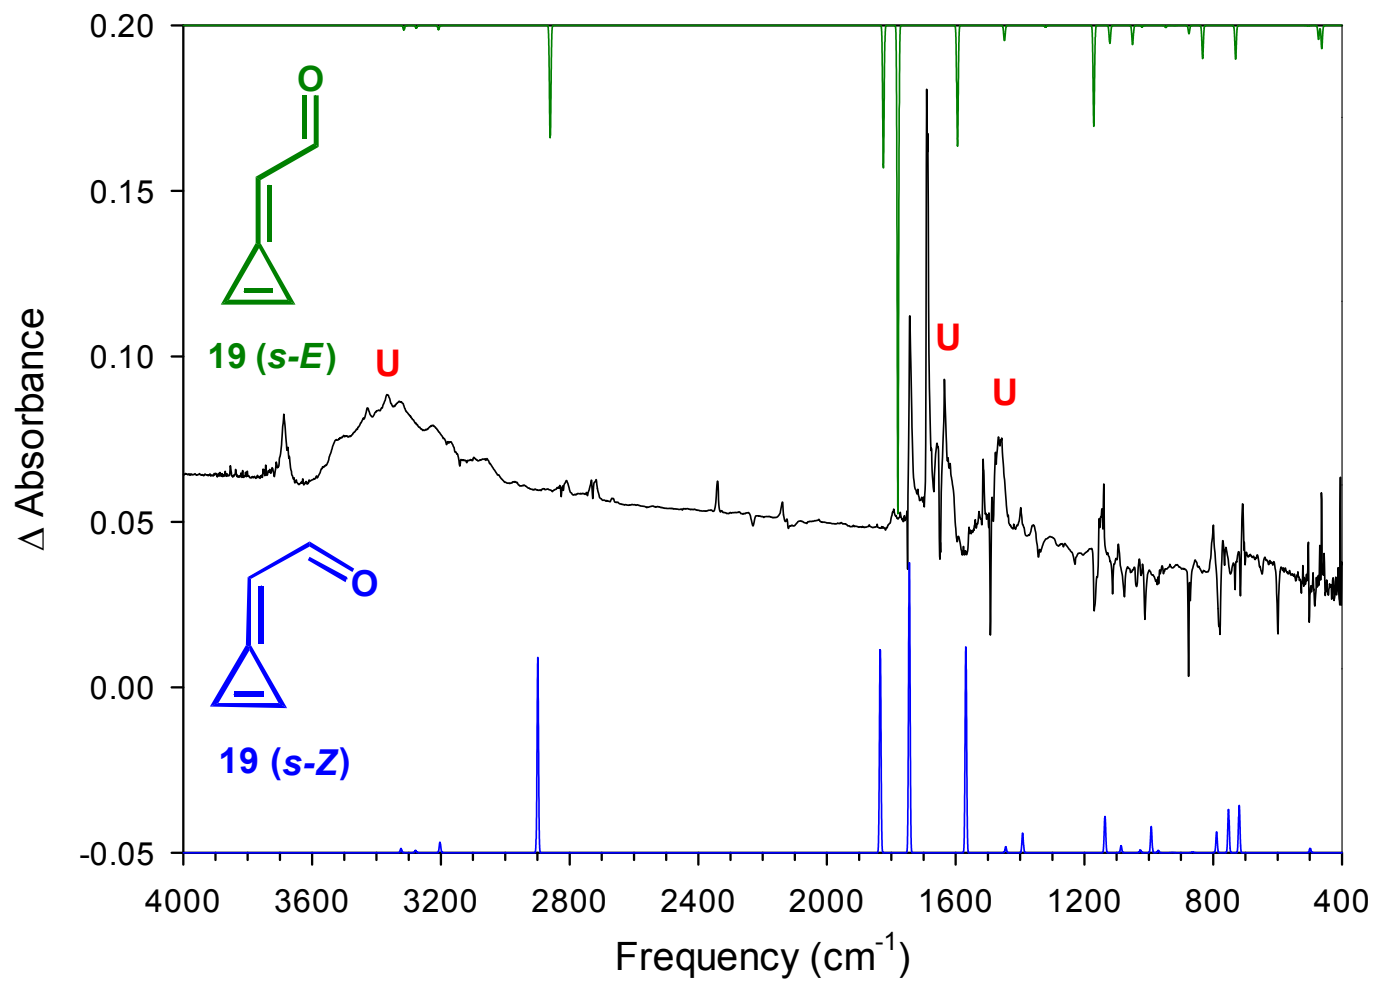

**Figure S17.** IR subtraction spectrum showing spectral changes observed upon irradiation ( $\lambda > 399$  nm, 10 h) of mixture of (*s-Z*) and (*s-E*)-( $\alpha$ -formyl)methylenecyclopropene (**19**) and an unknown species (**U**) (Ar, 10 K). The spectrum shows the disappearance of (*s-Z*)-**19** and the growth of (*s-E*)-**19** and **U**.

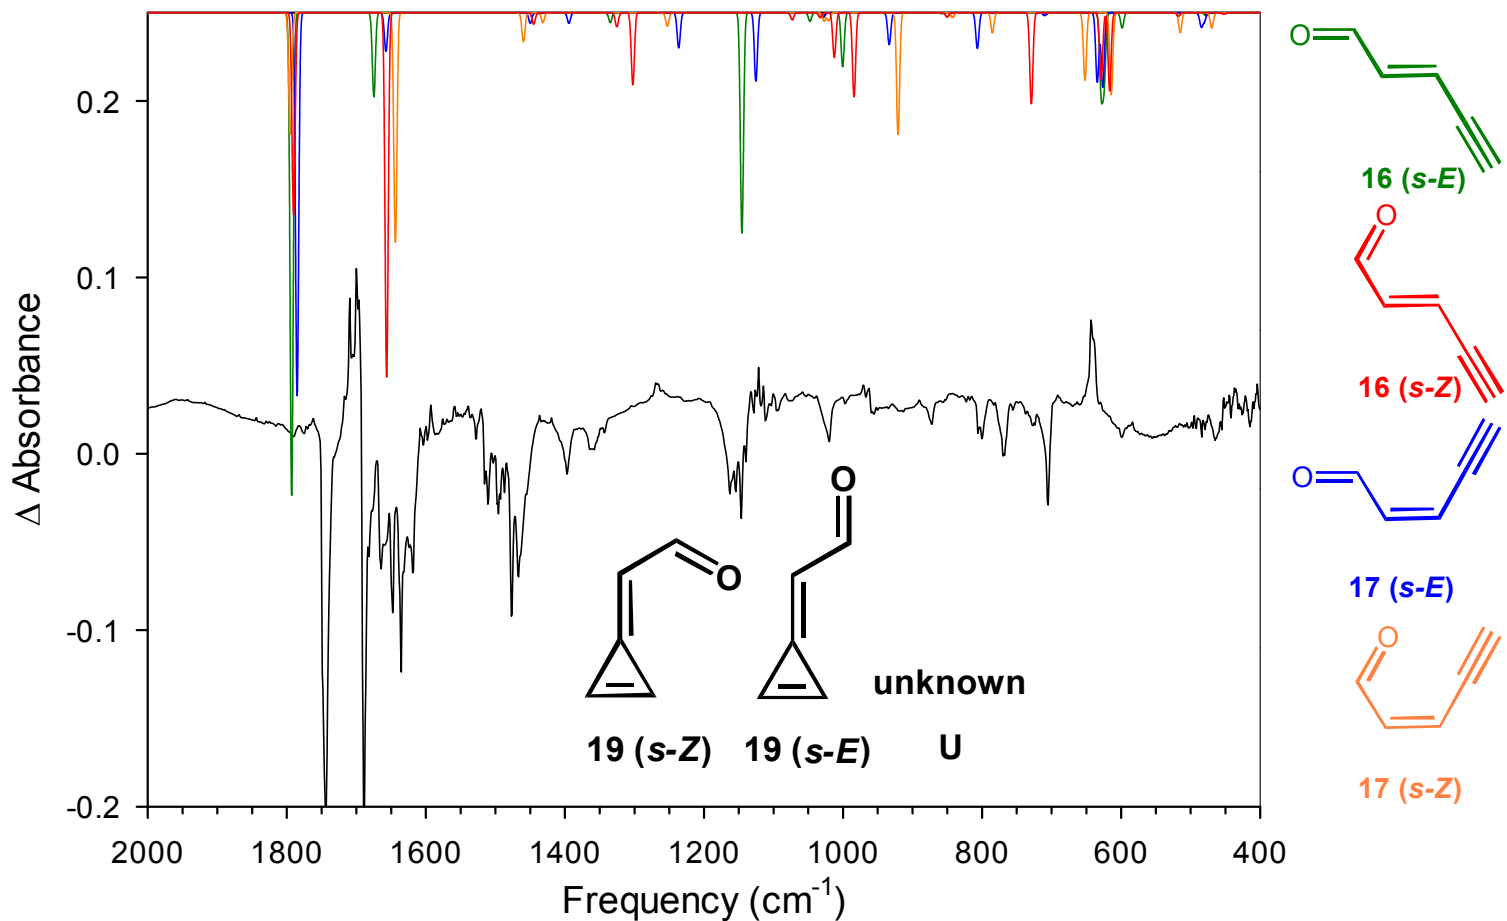

**Figure S18.** IR subtraction spectrum showing spectral changes observed upon irradiation ( $\lambda > 330$  nm, 20 h) of mixture of (*s-Z*) and (*s-E*)-( $\alpha$ -formyl)methylenecyclopropene (**19**), and an unknown species (U) (Ar, 10 K). The spectrum shows the disappearance of **19** and the growth of *E*-pent-2-en-4-ynal (**16**) and *Z*-pent-2-en-4-ynal (**17**). Calculated spectra for (*s-Z*) and (*s-E*) rotamers of **16** and **17** are seen at the top of the spectrum. Experimental IR stretches are best matched with the (*s-E*) rotamers of **16** and **17**.

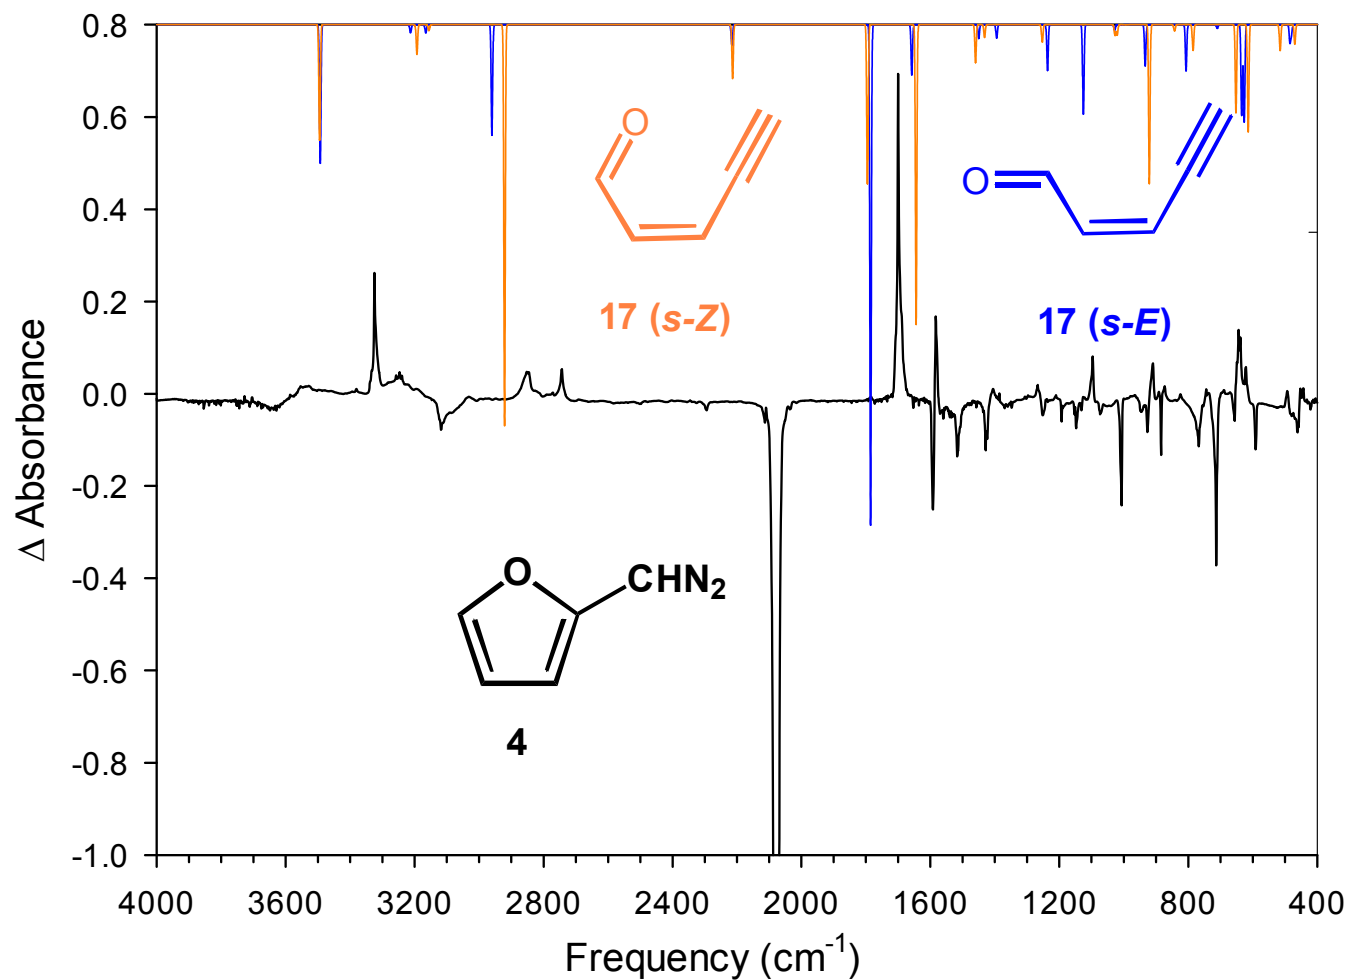

**Figure S19.** IR subtraction spectrum showing spectral changes observed upon irradiation ( $\lambda > 613$  nm, 22 h) of (2-furyl) diazomethane (**4**) (Ar, 10 K). The spectrum shows the disappearance of **4** and the growth of (*s-E*)-Z-pent-2-en-4-ynal (**17**). B3LYP/6-31G\* calculated IR frequencies of (*s-Z*) and (*s-E*)-**17** can be seen at the top of the spectrum.

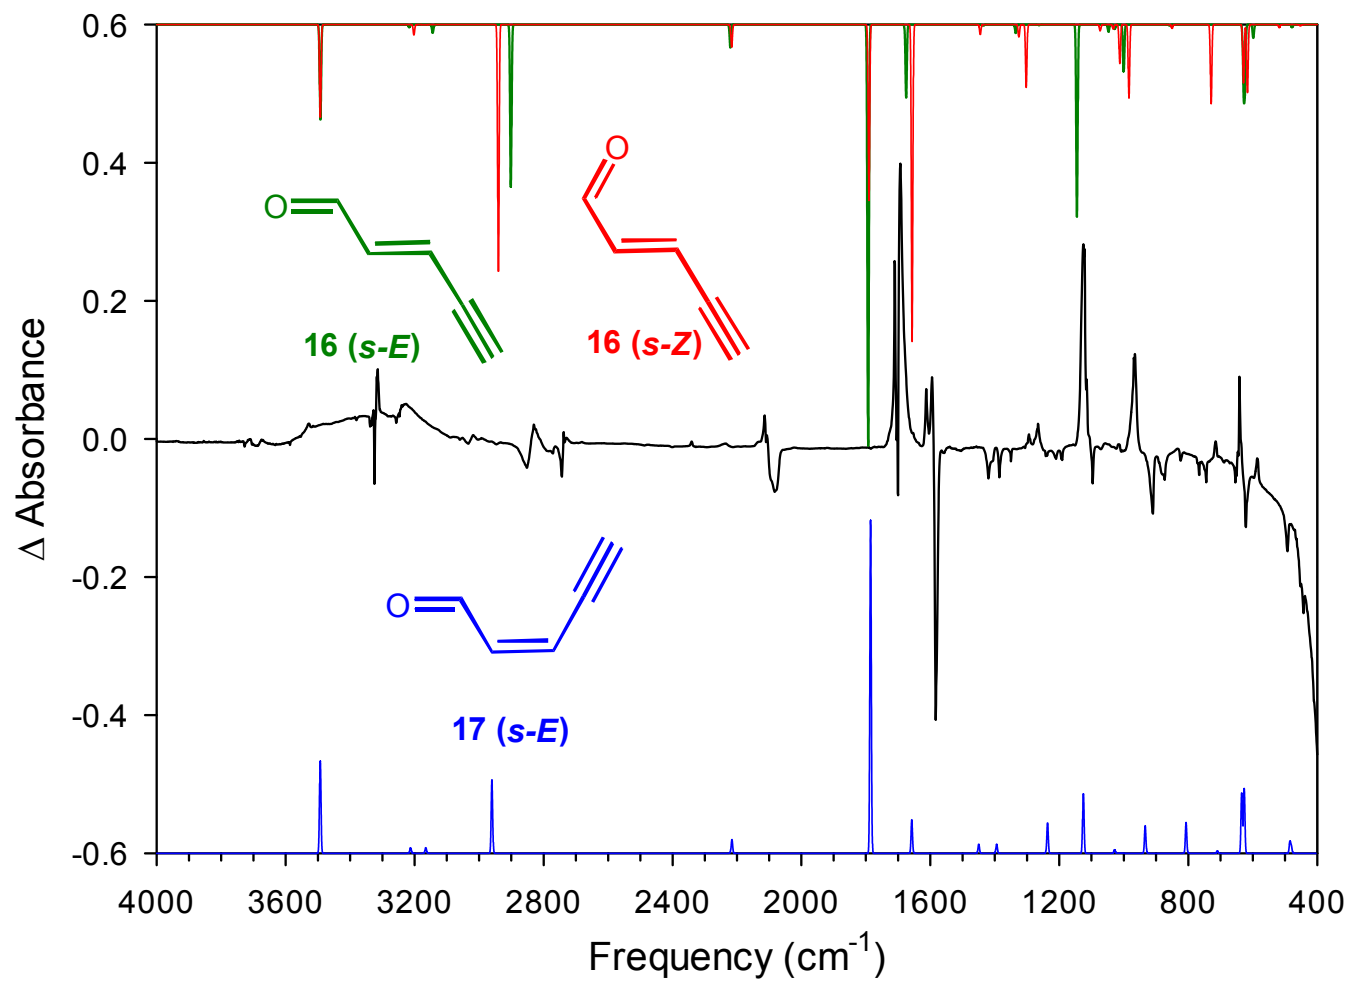

**Figure S20.** IR subtraction spectrum showing spectral changes observed upon irradiation ( $\lambda > 444$  nm, 24 h) of *Z*-pent-2-en-4-ynal (**17**). The spectrum shows the disappearance of (*s-E*)-**17** and the growth of (*s-E*)-*E*-pent-2-en-4-ynal (**16**).

**Table S.3** B3LYP/6-31G\* Uncorrected Energies (Hartree), Zero Point Vibrational Energies (kcal/mol), and Cartesian Coordinates (Å)

**(s-Z)-3-thienyldiazomethane (1)**

E = -700.553741306

ZPVE = 50.87070

|   |          |          |          |
|---|----------|----------|----------|
| S | -2.07625 | 0.015839 | -0.71449 |
| C | -2.01168 | 0.010835 | 1.017988 |
| C | -0.72651 | 0.000994 | 1.474384 |
| C | 0.2497   | -0.00278 | 0.41695  |
| C | -0.34599 | 0.004504 | -0.82519 |
| C | 1.676788 | -0.01312 | 0.703399 |
| N | 2.570433 | -0.01664 | -0.24027 |
| N | 3.337686 | -0.01955 | -1.09372 |
| H | -2.92471 | 0.015441 | 1.597788 |
| H | -0.4637  | -0.00355 | 2.527155 |
| H | 2.064017 | -0.01839 | 1.714264 |
| H | 0.133652 | 0.003836 | -1.79458 |

**Table S.4** B3LYP/6-31G\* Uncorrected Energies (Hartree), Zero Point Vibrational Energies (kcal/mol), and Cartesian Coordinates (Å)

**(s-E)-3-thienyldiazomethane (1)**

E = -700.554121914

ZPVE = 50.90832

|   |          |          |          |
|---|----------|----------|----------|
| S | -1.94906 | 0.043913 | -1.36711 |
| C | -1.91142 | -0.14688 | 0.356599 |
| C | -0.63722 | -0.12972 | 0.841763 |
| C | 0.354857 | 0.040962 | -0.18753 |
| C | -0.21951 | 0.148491 | -1.43462 |
| C | 1.790615 | 0.095862 | 0.036428 |
| H | -2.83247 | -0.26065 | 0.912116 |
| H | -0.39914 | -0.23413 | 1.894957 |
| H | 0.280298 | 0.282753 | -2.38427 |
| H | 2.501598 | 0.226066 | -0.76969 |
| N | 2.305117 | -0.00795 | 1.225572 |
| N | 2.747848 | -0.10191 | 2.28082  |



**Table S.5** B3LYP/6-31G\* Uncorrected Energies (Hartree), Zero Point Vibrational Energies (kcal/mol), and Cartesian Coordinates (Å)

**(s-Z)-2-thienyldiazomethane (2)**

$$E = -700.553197517$$

$$ZPVE = 50.77410$$

|   |          |          |          |
|---|----------|----------|----------|
| S | -1.20807 | 0.003383 | 0.270744 |
| C | -1.10131 | 0.020685 | 2.009413 |
| C | 0.197652 | 0.024149 | 2.431026 |
| C | 1.136306 | 0.012901 | 1.358315 |
| C | 0.539743 | 0.000835 | 0.115407 |
| C | 1.219403 | -0.01227 | -1.15944 |
| N | 0.592726 | -0.02328 | -2.29948 |
| N | 0.034095 | -0.03296 | -3.30239 |
| H | 2.30094  | -0.01348 | -1.21924 |
| H | 2.212635 | 0.013639 | 1.494053 |
| H | 0.483562 | 0.034433 | 3.47743  |
| H | -2.0066  | 0.027106 | 2.600538 |

**Table S.6** B3LYP/6-31G\* Uncorrected Energies (Hartree), Zero Point Vibrational Energies (kcal/mol), and Cartesian Coordinates (Å)

**(s-E)-2-thienyldiazomethane (2)**

$$E = -700.553077536$$

$$ZPVE = 50.80675$$

|   |          |          |          |
|---|----------|----------|----------|
| S | -1.7554  | -0.00733 | 0.05404  |
| C | -1.58888 | 0.015937 | 1.786132 |
| C | -0.27445 | 0.026804 | 2.158748 |
| C | 0.626437 | 0.016599 | 1.053807 |
| C | -0.01604 | -0.0022  | -0.16555 |
| C | 0.524087 | -0.01706 | -1.50808 |
| N | 1.808351 | -0.01427 | -1.71813 |
| N | 2.944439 | -0.01089 | -1.879   |
| H | -0.09548 | -0.03166 | -2.39557 |
| H | 1.706433 | 0.022878 | 1.155702 |
| H | 0.050067 | 0.041722 | 3.193808 |
| H | -2.47118 | 0.02001  | 2.411016 |

**Table S.7** B3LYP/6-31G\* Uncorrected Energies (Hartree), Zero Point Vibrational Energies (kcal/mol), and Cartesian Coordinates (Å)

**(s-Z)-3-furyldiazomethane (3)**

$$E = -377.570395709$$

$$ZPVE = 52.91204$$

|   |          |          |          |
|---|----------|----------|----------|
| O | -2.13693 | 0.01059  | -0.47614 |
| C | -2.22163 | 0.010872 | 0.881173 |
| C | -0.98311 | 0.00478  | 1.439803 |
| C | -0.04248 | 0.000278 | 0.345544 |
| C | -0.80763 | 0.004146 | -0.79204 |
| C | 1.401916 | -0.00677 | 0.495305 |
| N | 2.203138 | -0.01093 | -0.52791 |
| N | 2.892966 | -0.01451 | -1.44571 |
| H | -3.22037 | 0.01578  | 1.290342 |
| H | -0.74749 | 0.003518 | 2.49518  |
| H | 1.88174  | -0.00891 | 1.465457 |
| H | -0.57353 | 0.003098 | -1.8452  |

**Table S.8** B3LYP/6-31G\* Uncorrected Energies (Hartree), Zero Point Vibrational Energies (kcal/mol), and Cartesian Coordinates (Å)

**(s-E)-3-furyldiazomethane (3)**

$$E = -377.571292646$$

$$ZPVE = 52.96146$$

|   |          |          |          |
|---|----------|----------|----------|
| O | -2.08686 | 0.012437 | -1.18277 |
| C | -2.15829 | 0.174879 | 0.166226 |
| C | -0.91919 | 0.150471 | 0.722502 |
| C | 0.009192 | -0.04332 | -0.36585 |
| C | -0.7634  | -0.11931 | -1.49489 |
| C | 1.455101 | -0.14047 | -0.30561 |
| N | 2.096715 | -0.05532 | 0.821095 |
| N | 2.65318  | 0.021388 | 1.822836 |
| H | -3.15075 | 0.29387  | 0.573487 |
| H | -0.67935 | 0.255519 | 1.771588 |
| H | 2.07041  | -0.28726 | -1.18438 |
| H | -0.53515 | -0.25765 | -2.54029 |

**Table S.9** B3LYP/6-31G\* Uncorrected Energies (Hartree), Zero Point Vibrational Energies (kcal/mol), and Cartesian Coordinates (Å)

**(s-Z)-2-furyldiazomethane (4)**

E = -377.574344875

ZPVE = 52.85073

|   |          |          |          |
|---|----------|----------|----------|
| O | -0.87271 | 0.002739 | 0.476679 |
| C | -0.96234 | 0.001086 | 1.845738 |
| C | 0.279339 | -0.00227 | 2.398681 |
| C | 1.211423 | -0.00417 | 1.310427 |
| C | 0.457809 | -0.00133 | 0.164201 |
| C | 0.821376 | -0.00179 | -1.2302  |
| N | -0.07307 | 0.001506 | -2.17534 |
| N | -0.86376 | 0.004454 | -3.00571 |
| H | 1.855477 | -0.00498 | -1.54737 |
| H | 2.290683 | -0.00746 | 1.369116 |
| H | 0.512189 | -0.00388 | 3.454527 |
| H | -1.96451 | 0.003482 | 2.244562 |

**Table S.10** B3LYP/6-31G\* Uncorrected Energies (Hartree), Zero Point Vibrational Energies (kcal/mol), and Cartesian Coordinates (Å)

**(s-E)-2-furyldiazomethane (4)**

E = -377.573818739

ZPVE = 52.79835

|   |          |          |          |
|---|----------|----------|----------|
| O | 0.954121 | 0.293333 | -1.25779 |
| C | 1.026666 | 1.659096 | -1.33543 |
| C | 0.285215 | 2.227249 | -0.34732 |
| C | -0.29174 | 1.15103  | 0.401221 |
| C | 0.146978 | -0.00445 | -0.19441 |
| C | -0.04588 | -1.41497 | 0.041724 |
| N | -0.78777 | -1.84766 | 1.01698  |
| N | -1.44572 | -2.21645 | 1.882081 |
| H | 0.420455 | -2.1636  | -0.58497 |
| H | -0.94166 | 1.225632 | 1.261683 |
| H | 0.158896 | 3.28565  | -0.1661  |
| H | 1.636321 | 2.046749 | -2.13644 |

**Table S.11** B3LYP/6-31G\* Uncorrected Energies (Hartree), Zero Point Vibrational Energies (kcal/mol), and Cartesian Coordinates (Å)

**(s-Z)-E-pent-2-en-4-ynethial (5)**

E = -591.019126029

ZPVE = 43.29916

|   |           |           |           |
|---|-----------|-----------|-----------|
| C | -0.996467 | -0.090462 | 3.392487  |
| H | -1.265453 | -0.184432 | 4.420477  |
| C | -0.683956 | 0.002428  | 2.224432  |
| C | -0.340779 | 0.152396  | 0.864375  |
| H | -0.643804 | 1.073228  | 0.365847  |
| C | 0.340356  | -0.776447 | 0.143930  |
| H | 0.649177  | -1.700231 | 0.628339  |
| C | 0.694236  | -0.624844 | -1.253638 |
| S | 0.371084  | 0.644384  | -2.248739 |
| H | 1.242395  | -1.477140 | -1.664353 |

**Table S.12** B3LYP/6-31G\* Uncorrected Energies (Hartree), Zero Point Vibrational Energies (kcal/mol), and Cartesian Coordinates (Å)

**(s-E)-E-pent-2-en-4-ynethial (5)**

E = -591.022652707

ZPVE = 43.37235

|   |           |           |           |
|---|-----------|-----------|-----------|
| S | -1.254499 | -0.002629 | -2.355870 |
| C | -1.090475 | -0.012578 | -0.721709 |
| C | 0.160911  | 0.002761  | -0.010727 |
| C | 0.205531  | -0.007036 | 1.348734  |
| C | 1.395365  | 0.006895  | 2.109512  |
| C | 2.398453  | 0.018325  | 2.790000  |
| H | 3.290649  | 0.028653  | 3.374801  |
| H | -0.730885 | -0.026975 | 1.907215  |
| H | 1.077322  | 0.022560  | -0.594179 |
| H | -1.983815 | -0.032376 | -0.088782 |

**Table S.13** B3LYP/6-31G\* Uncorrected Energies (Hartree), Zero Point Vibrational Energies (kcal/mol), and Cartesian Coordinates (Å)

**(s-Z)-Z-pent-2-en-4-ynethial (6)**

E = -591.013697909

ZPVE = 43.41683

|   |           |           |           |
|---|-----------|-----------|-----------|
| C | -1.781609 | 1.613933  | -1.781609 |
| H | -2.831713 | 1.773040  | 1.098856  |
| C | -0.607969 | 1.352791  | 0.838403  |
| C | 0.789485  | 1.193918  | 0.739941  |
| H | 1.369461  | 1.978407  | 1.226134  |
| C | 1.496328  | 0.203814  | 0.126315  |
| H | 2.579841  | 0.293089  | 0.181644  |
| C | 1.018189  | -0.956570 | -0.592842 |
| S | -0.527122 | -1.431979 | -0.887480 |
| H | 1.829815  | -1.580194 | -0.979338 |

**Table S.14** B3LYP/6-31G\* Uncorrected Energies (Hartree), Zero Point Vibrational Energies (kcal/mol), and Cartesian Coordinates (Å)

**(s-E)-Z-pent-2-en-4-ynethial (6)**

E = -591.021458570

ZPVE = 43.51655

|   |           |           |           |
|---|-----------|-----------|-----------|
| S | -0.054650 | 0.027762  | -2.450383 |
| C | -0.150679 | 0.007590  | -0.810735 |
| C | 0.983258  | 0.010905  | 0.077967  |
| C | 0.884919  | -0.006034 | 1.436059  |
| C | -0.319996 | -0.029116 | 2.178572  |
| C | -1.323368 | -0.049029 | 2.858371  |
| H | -2.215427 | -0.066511 | 3.443274  |
| H | 1.803586  | -0.001791 | 2.021156  |
| H | 1.970133  | 0.028030  | -0.376245 |
| H | -1.128700 | -0.009818 | -0.323466 |

**Table S.15** B3LYP/6-31G\* Uncorrected Energies (Hartree), Zero Point Vibrational Energies (kcal/mol), and Cartesian Coordinates (Å)

**4-thiacyclohexa-1,2,5-triene (7)**

E = -591.011046449

ZPVE = 44.46642

|   |           |           |           |
|---|-----------|-----------|-----------|
| C | -1.317088 | 0.395131  | -0.839503 |
| C | -1.215232 | 0.097976  | 0.484653  |
| S | 0.256927  | -0.387857 | 1.316351  |
| C | 1.433311  | 0.164147  | 0.106397  |
| C | 1.024983  | 0.137162  | -1.165962 |
| C | -0.204243 | 0.061865  | -1.711579 |
| H | 2.328625  | 0.640947  | 0.494453  |
| H | -0.401292 | -0.358501 | -2.696876 |
| H | -2.088639 | 0.072131  | 1.130161  |
| H | -2.279922 | 0.713444  | -1.233390 |

**Table S.16** B3LYP/6-31G\* Uncorrected Energies (Hartree), Zero Point Vibrational Energies (kcal/mol), and Cartesian Coordinates (Å)

**propargyl thioketene (8)**

E = -591.004477685

ZPVE = 42.96739

|   |           |           |           |
|---|-----------|-----------|-----------|
| C | 2.175379  | 0.986530  | -2.435036 |
| C | 1.734175  | 0.920018  | -1.313336 |
| C | 1.185851  | 0.854391  | 0.043815  |
| C | -0.333728 | 0.720887  | 0.051348  |
| C | -0.970803 | -0.275047 | 0.617427  |
| S | -1.718493 | -1.471537 | 1.306976  |
| H | 2.565157  | 1.035736  | -3.426401 |
| H | -0.914325 | 1.491015  | -0.453047 |
| H | 1.467700  | 1.763396  | 0.594766  |
| H | 1.632119  | 0.013769  | 0.587756  |

**Table S.17** B3LYP/6-31G\* Uncorrected Energies (Hartree), Zero Point Vibrational Energies (kcal/mol), and Cartesian Coordinates (Å)

**(s-Z)- $\alpha$ -thial methylenecyclopropene (9)**

E = -591.000463018

ZPVE = 43.70925

|   |           |           |           |
|---|-----------|-----------|-----------|
| C | -1.245447 | -0.712609 | 0.355189  |
| C | -0.045466 | -0.579653 | 1.117434  |
| C | 1.036313  | 0.109970  | 0.667977  |
| C | 2.355626  | 0.624596  | 0.770949  |
| C | 1.669701  | 0.886257  | -0.338233 |
| S | -1.592611 | -0.106376 | -1.151500 |
| H | 3.268601  | 0.730805  | 1.340737  |
| H | 1.604727  | 1.346551  | -1.312030 |
| H | 0.004926  | -1.048802 | 2.096473  |
| H | -2.020845 | -1.297918 | 0.858916  |

**Table S.18** B3LYP/6-31G\* Uncorrected Energies (Hartree), Zero Point Vibrational Energies (kcal/mol), and Cartesian Coordinates (Å)

**(s-E)- $\alpha$ -thial methylenecyclopropene (9)**

E = -591.000292033

ZPVE = 43.60790

|   |           |           |           |
|---|-----------|-----------|-----------|
| C | -0.719099 | 0.025677  | -2.452066 |
| C | -0.597864 | 0.003970  | -0.803898 |
| C | 0.608423  | 0.008094  | -0.043757 |
| C | 0.587840  | -0.011254 | 1.312738  |
| C | 1.226481  | -0.021368 | 2.588760  |
| S | -0.099428 | -0.037342 | 2.566109  |
| H | 2.138148  | -0.018335 | 3.169064  |
| H | -1.029838 | -0.056510 | 3.115525  |
| H | 1.561015  | 0.027135  | -0.564810 |
| H | -1.516453 | -0.015728 | -0.206434 |

**Table S.19** B3LYP/6-31G\* Uncorrected Energies (Hartree), Zero Point Vibrational Energies (kcal/mol), and Cartesian Coordinates (Å)

**4-thiacyclohexa-2,5-dienylidene (triplet) (10)**

E = -590.988208

ZPVE = 43.7022

|   |          |           |           |
|---|----------|-----------|-----------|
| C | 0.000000 | 1.374198  | 0.267267  |
| C | 0.000000 | 1.251424  | -1.098883 |
| C | 0.000000 | 0.000000  | -1.719587 |
| C | 0.000000 | -1.251424 | -1.098883 |
| C | 0.000000 | -1.374198 | 0.267267  |
| H | 0.000000 | -2.162246 | -1.695591 |
| H | 0.000000 | -2.336798 | 0.767253  |
| S | 0.000000 | 0.000000  | 1.384599  |
| H | 0.000000 | 2.162246  | -1.695591 |
| H | 0.000000 | 2.336798  | 0.767253  |

**Table S.20** B3LYP/6-31G\* Uncorrected Energies (Hartree), Zero Point Vibrational Energies (kcal/mol), and Cartesian Coordinates (Å)

**4-thiacyclohexa-2,5-dienylidene (singlet) (10)**

E = -590.993805

ZPVE = 44.1904

|   |          |           |           |
|---|----------|-----------|-----------|
| C | 0.000000 | 1.333144  | 0.296508  |
| C | 0.000000 | 1.205648  | -1.071672 |
| C | 0.000000 | 0.000000  | -1.853743 |
| C | 0.000000 | -1.205648 | -1.071672 |
| C | 0.000000 | -1.333144 | 0.296508  |
| H | 0.000000 | -2.157543 | -1.610882 |
| H | 0.000000 | -2.294663 | 0.806294  |
| S | 0.000000 | 0.000000  | 1.377100  |
| H | 0.000000 | 2.157543  | -1.610882 |
| H | 0.000000 | 2.294663  | 0.806294  |



**Table S.21** B3LYP/6-31G\* Uncorrected Energies (Hartree), Zero Point Vibrational Energies (kcal/mol), and Cartesian Coordinates (Å)

**(s-Z)-2-thienyl carbene (triplet) (11)**

E = -590.991165600

ZPVE = 42.79053

|   |           |           |           |
|---|-----------|-----------|-----------|
| C | -1.509330 | 0.004531  | -0.452290 |
| C | -1.421630 | 0.004177  | 0.923238  |
| C | -0.101756 | 0.000204  | 1.406855  |
| C | 0.884654  | -0.002683 | 0.388788  |
| C | 2.237789  | -0.006705 | 0.503868  |
| S | 0.055785  | -0.000071 | -1.214753 |
| H | 3.097744  | -0.009290 | -0.149197 |
| H | 0.169953  | -0.000690 | 2.455833  |
| H | -2.294597 | 0.006753  | 1.567539  |
| H | -2.404026 | 0.007218  | -1.060878 |

**Table S.22** B3LYP/6-31G\* Uncorrected Energies (Hartree), Zero Point Vibrational Energies (kcal/mol), and Cartesian Coordinates (Å)

**(s-Z)-2-thienyl carbene (singlet) (11)**

E = -590.990451033

ZPVE = 43.38796

|   |           |           |           |
|---|-----------|-----------|-----------|
| C | -1.465527 | 0.006505  | -0.530525 |
| C | -1.450800 | 0.005978  | 0.859166  |
| C | -0.151978 | 0.000197  | 1.377029  |
| C | 0.888397  | -0.003978 | 0.426669  |
| C | 2.242463  | -0.009924 | 0.721593  |
| S | 0.086905  | 0.000035  | -1.228691 |
| H | 2.847291  | -0.012227 | -0.204200 |
| H | 0.095668  | -0.001225 | 2.432556  |
| H | -2.353915 | 0.009678  | 1.458738  |
| H | -2.354857 | 0.010553  | -1.151631 |

**Table S.23** CCSD/cc-pVTZ Uncorrected Energies (Hartree), Zero Point Vibrational Energies (kcal/mol), and Cartesian Coordinates (Å)

**(s-Z)-2-thienyl carbene (triplet) (11)**

E = -590.1204072

ZPVE = 43.1902

|   |             |            |             |
|---|-------------|------------|-------------|
| S | 0.00000000  | 0.00000000 | 0.00000000  |
| C | 0.00000000  | 0.00000000 | 1.72958016  |
| C | 1.26854928  | 0.00000000 | 2.25037638  |
| C | 2.27514010  | 0.00000000 | 1.26639166  |
| C | 1.77172264  | 0.00000000 | -0.04832951 |
| H | -0.93186721 | 0.00000000 | 2.26828124  |
| H | 1.46805547  | 0.00000000 | 3.31071878  |
| H | 3.33386164  | 0.00000000 | 1.47001539  |
| C | 2.46781358  | 0.00000000 | -1.22438561 |
| H | 2.22203627  | 0.00000000 | -2.27189881 |

**Table S.24** CCSD/cc-pVTZ Uncorrected Energies (Hartree), Zero Point Vibrational Energies (kcal/mol), and Cartesian Coordinates (Å)

**(s-Z)-2-thienyl carbene (singlet) (11)**

E = -590.118175

ZPVE = 43.9838

|   |             |            |             |
|---|-------------|------------|-------------|
| S | 0.00000000  | 0.00000000 | 0.00000000  |
| C | 0.00000000  | 0.00000000 | 1.69545971  |
| C | 1.27372857  | 0.00000000 | 2.23636199  |
| C | 2.26042222  | 0.00000000 | 1.24394197  |
| C | 1.76642692  | 0.00000000 | -0.06475263 |
| H | -0.92558569 | 0.00000000 | 2.24896229  |
| H | 1.46508134  | 0.00000000 | 3.29733791  |
| H | 3.32486294  | 0.00000000 | 1.42043902  |
| C | 2.56296869  | 0.00000000 | -1.22125773 |
| H | 1.90295610  | 0.00000000 | -2.10572111 |

**Table S.25** B3LYP/6-31G\* Uncorrected Energies (Hartree), Zero Point Vibrational Energies (kcal/mol), and Cartesian Coordinates (Å)

**(*s-E*)-2-thienyl carbene (triplet) (11)**

E = -590.989918677

ZPVE = 42.77867

|   |           |           |           |
|---|-----------|-----------|-----------|
| C | -1.469404 | 0.010213  | -0.578724 |
| C | -1.477478 | 0.004520  | 0.799288  |
| C | -0.192641 | -0.004485 | 1.370875  |
| C | 0.856407  | -0.006119 | 0.412680  |
| C | 2.203758  | -0.013972 | 0.602340  |
| S | 0.144164  | 0.004073  | -1.228795 |
| H | 2.873577  | -0.020718 | 1.450489  |
| H | 0.007867  | -0.009821 | 2.436031  |
| H | -2.392258 | 0.006981  | 1.383029  |
| H | -2.319654 | 0.017447  | -1.247581 |

**Table S.26** B3LYP/6-31G\* Uncorrected Energies (Hartree), Zero Point Vibrational Energies (kcal/mol), and Cartesian Coordinates (Å)

**(*s-E*)-2-thienyl carbene (singlet) (11)**

E = -590.987685382

ZPVE = 43.44608

|   |           |           |           |
|---|-----------|-----------|-----------|
| C | -1.452976 | 0.009825  | -0.558454 |
| C | -1.462709 | 0.003910  | 0.833715  |
| C | -0.170729 | -0.005013 | 1.367862  |
| C | 0.867001  | -0.005944 | 0.412525  |
| C | 2.263412  | -0.013477 | 0.480967  |
| S | 0.116216  | 0.004406  | -1.214383 |
| H | 2.529177  | -0.018870 | 1.559248  |
| H | 0.049842  | -0.010595 | 2.430839  |
| H | -2.375303 | 0.006106  | 1.419580  |
| H | -2.327167 | 0.017059  | -1.199233 |

**Table S.27** CCSD/cc-pVTZ Uncorrected Energies (Hartree), Zero Point Vibrational Energies (kcal/mol), and Cartesian Coordinates (Å)

**(*s-E*)-2-thienyl carbene (triplet) (11)**

E = -590.1193378

ZPVE = 43.167

|   |             |            |             |
|---|-------------|------------|-------------|
| S | 0.00000000  | 0.00000000 | 0.00000000  |
| C | 0.00000000  | 0.00000000 | 1.72888219  |
| C | 1.26805256  | 0.00000000 | 2.25002611  |
| C | 2.27370359  | 0.00000000 | 1.26398469  |
| C | 1.76148423  | 0.00000000 | -0.05015265 |
| H | -0.93143031 | 0.00000000 | 2.26807986  |
| H | 1.46910636  | 0.00000000 | 3.31016934  |
| H | 3.33283734  | 0.00000000 | 1.46712995  |
| C | 2.45144211  | 0.00000000 | -1.23260092 |
| H | 3.49416343  | 0.00000000 | -1.50050938 |

**Table S.28** CCSD/cc-pVTZ Uncorrected Energies (Hartree), Zero Point Vibrational Energies (kcal/mol), and Cartesian Coordinates (Å)

**(*s-E*)-2-thienyl carbene (singlet) (11)**

E = -590.1167887

ZPVE = 43.9689

|   |             |            |             |
|---|-------------|------------|-------------|
| S | 0.00000000  | 0.00000000 | 0.00000000  |
| C | 0.00000000  | 0.00000000 | 1.69192547  |
| C | 1.27627033  | 0.00000000 | 2.23384088  |
| C | 2.25895267  | 0.00000000 | 1.23991869  |
| C | 1.75119292  | 0.00000000 | -0.06636238 |
| H | -0.92463665 | 0.00000000 | 2.24644457  |
| H | 1.46924446  | 0.00000000 | 3.29476977  |
| H | 3.32241248  | 0.00000000 | 1.42825655  |
| C | 2.37566048  | 0.00000000 | -1.32815855 |
| H | 3.46238124  | 0.00000000 | -1.12768245 |

**Table S.29** B3LYP/6-31G\* Uncorrected Energies (Hartree), Zero Point Vibrational Energies (kcal/mol), and Cartesian Coordinates (Å)

**2-thiabicyclo[3.1.0]hexa-3,5-diene (12)**

E = -590.989255448

ZPVE = 44.11613

|   |           |           |           |
|---|-----------|-----------|-----------|
| S | -1.061637 | 0.372671  | -0.782874 |
| C | -0.824509 | 0.728174  | 0.933207  |
| C | 0.252763  | 0.172246  | 1.549855  |
| C | 1.024813  | -0.522570 | 0.551657  |
| C | 0.335023  | -0.870530 | -0.729227 |
| C | 1.755996  | -0.483780 | -0.541682 |
| H | -1.464643 | 1.477482  | 1.388066  |
| H | 2.641524  | -0.082046 | -1.013781 |
| H | 0.546311  | 0.370331  | 2.573122  |
| H | -0.001518 | -1.869751 | -1.004271 |

**Table S.30** B3LYP/6-31G\* Uncorrected Energies (Hartree), Zero Point Vibrational Energies (kcal/mol), and Cartesian Coordinates (Å)

**(s-Z)-3-thienyl carbene (triplet) (13)**

E = -590.983919116

ZPVE = 43.00741

|   |           |           |           |
|---|-----------|-----------|-----------|
| C | -1.278238 | 0.001949  | -0.734658 |
| C | -1.191399 | -0.004441 | 0.618478  |
| C | 0.177790  | -0.005126 | 1.113388  |
| C | 1.086677  | 0.001089  | 0.039340  |
| C | 0.524589  | -0.011098 | 2.456610  |
| S | 0.292811  | 0.007576  | -1.500189 |
| H | -2.171970 | 0.003747  | -1.344550 |
| H | -2.050043 | -0.008664 | 1.280164  |
| H | 1.454301  | -0.012607 | 3.010194  |
| H | 2.166232  | 0.002071  | 0.098266  |

**Table S.31** B3LYP/6-31G\* Uncorrected Energies (Hartree), Zero Point Vibrational Energies (kcal/mol), and Cartesian Coordinates (Å)

**(s-Z)-3-thienyl carbene (singlet) (13)**

E = -590.976821079

ZPVE = 43.28164

|   |           |           |           |
|---|-----------|-----------|-----------|
| C | -1.184279 | 0.001811  | -0.893148 |
| C | -1.260903 | -0.004820 | 0.460533  |
| C | 0.031548  | -0.005307 | 1.123791  |
| C | 1.062416  | 0.001384  | 0.172206  |
| C | 0.181002  | -0.011795 | 2.545528  |
| S | 0.486463  | 0.007875  | -1.435908 |
| H | -1.978483 | 0.003672  | -1.627533 |
| H | -2.185739 | -0.009443 | 1.025585  |
| H | 1.275700  | -0.010490 | 2.748592  |
| H | 2.126405  | 0.002627  | 0.374417  |

**Table S.32** CCSD/cc-pVTZ Uncorrected Energies (Hartree), Zero Point Vibrational Energies (kcal/mol), and Cartesian Coordinates (Å)

**(s-Z)-3-thienyl carbene (triplet) (13)**

E = -590.1157646

ZPVE = 43.4472

|   |             |            |             |
|---|-------------|------------|-------------|
| S | 0.00000000  | 0.00000000 | 0.00000000  |
| C | 0.00000000  | 0.00000000 | 1.73404154  |
| C | 1.24790302  | 0.00000000 | 2.25078588  |
| C | 2.28445421  | 0.00000000 | 1.23521334  |
| C | 1.72016380  | 0.00000000 | -0.04059993 |
| H | -0.93304108 | 0.00000000 | 2.27105435  |
| H | 1.46361013  | 0.00000000 | 3.30751158  |
| C | 3.65028968  | 0.00000000 | 1.50847703  |
| H | 2.24622803  | 0.00000000 | -0.97942479 |
| H | 4.53958910  | 0.00000000 | 0.89988341  |

**Table S.33** CCSD/cc-pVTZ Uncorrected Energies (Hartree), Zero Point Vibrational Energies (kcal/mol), and Cartesian Coordinates (Å)

**(s-Z)-3-thienyl carbene (singlet) (13)**

E = -590.1094858

ZPVE = 43.7883

|   |             |            |             |
|---|-------------|------------|-------------|
| S | 0.00000000  | 0.00000000 | 0.00000000  |
| C | 0.00000000  | 0.00000000 | 1.74094967  |
| C | 1.26049372  | 0.00000000 | 2.23552145  |
| C | 2.27877566  | 0.00000000 | 1.20967095  |
| C | 1.69643684  | 0.00000000 | -0.05403604 |
| H | -0.93568084 | 0.00000000 | 2.27253218  |
| H | 1.50652001  | 0.00000000 | 3.28545128  |
| C | 3.68492366  | 0.00000000 | 1.48305202  |
| H | 2.21988994  | 0.00000000 | -0.99624452 |
| H | 4.18872820  | 0.00000000 | 0.49777241  |

**Table S.34** B3LYP/6-31G\* Uncorrected Energies (Hartree), Zero Point Vibrational Energies (kcal/mol), and Cartesian Coordinates (Å)

**(*s-E*)-3-thienyl carbene (triplet) (13)**

$$E = -590.983510731$$

$$ZPVE = 42.92266$$

|   |           |           |           |
|---|-----------|-----------|-----------|
| C | -1.217547 | 0.002415  | -0.794979 |
| C | -1.189588 | -0.005101 | 0.560841  |
| C | 0.162142  | -0.005708 | 1.113369  |
| C | 1.111277  | 0.000664  | 0.078722  |
| C | 0.459289  | -0.012014 | 2.468669  |
| S | 0.384136  | 0.008693  | -1.491687 |
| H | -2.084699 | 0.004689  | -1.442166 |
| H | -2.077780 | -0.009827 | 1.182847  |
| H | -0.123983 | -0.017322 | 3.379905  |
| H | 2.186850  | 0.001821  | 0.186676  |

**Table S.35** B3LYP/6-31G\* Uncorrected Energies (Hartree), Zero Point Vibrational Energies (kcal/mol), and Cartesian Coordinates (Å)

**(*s-E*)-3-thienyl carbene (singlet) (13)**

$$E = -590.977504416$$

$$ZPVE = 43.30839$$

|   |           |           |           |
|---|-----------|-----------|-----------|
| C | -0.784873 | 0.002175  | -1.249901 |
| C | -1.205794 | -0.004605 | 0.569751  |
| C | 0.146397  | -0.005528 | 1.113106  |
| C | 1.083097  | 0.001156  | 0.070027  |
| C | 0.631152  | -0.011388 | 2.455567  |
| S | 0.366904  | 0.008030  | -1.476506 |
| H | -2.106903 | 0.004208  | -1.445498 |
| H | -2.089167 | -0.009002 | 1.199684  |
| H | -0.260719 | -0.016588 | 3.122639  |
| H | 2.156619  | 0.002034  | 0.205811  |



**Table S.36** CCSD/cc-pVTZ Uncorrected Energies (Hartree), Zero Point Vibrational Energies (kcal/mol), and Cartesian Coordinates (Å)

**(*s-E*)-3-thienyl carbene (triplet) (13)**

E = -590.1153869

ZPVE = 43.3765

|   |             |            |             |
|---|-------------|------------|-------------|
| S | 0.00000000  | 0.00000000 | 0.00000000  |
| C | 0.00000000  | 0.00000000 | 1.73328855  |
| C | 1.24821244  | 0.00000000 | 2.25004256  |
| C | 2.28557377  | 0.00000000 | 1.22975426  |
| C | 1.71899716  | 0.00000000 | -0.04167027 |
| H | -0.93250327 | 0.00000000 | 2.27131601  |
| H | 1.46182409  | 0.00000000 | 3.30750711  |
| C | 3.65221888  | 0.00000000 | 1.50132362  |
| H | 2.24656581  | 0.00000000 | -0.97938130 |
| H | 4.23477212  | 0.00000000 | 2.40768084  |

**Table S.37** CCSD/cc-pVTZ Uncorrected Energies (Hartree), Zero Point Vibrational Energies (kcal/mol), and Cartesian Coordinates (Å)

**(*s-E*)-3-thienyl carbene (singlet) (13)**

E = -590.1101821

ZPVE = 43.787

|   |             |            |             |
|---|-------------|------------|-------------|
| S | 0.00000000  | 0.00000000 | 0.00000000  |
| C | 0.00000000  | 0.00000000 | 1.74217342  |
| C | 1.26015170  | 0.00000000 | 2.23683976  |
| C | 2.27978253  | 0.00000000 | 1.20653402  |
| C | 1.69423050  | 0.00000000 | -0.05446200 |
| H | -0.93534461 | 0.00000000 | 2.27485481  |
| H | 1.49133977  | 0.00000000 | 3.29111050  |
| C | 3.70622124  | 0.00000000 | 1.30593513  |
| H | 2.23557037  | 0.00000000 | -0.98565696 |
| H | 3.95209108  | 0.00000000 | 2.38520589  |

**Table S.38** B3LYP/6-31G\* Uncorrected Energies (Hartree), Zero Point Vibrational Energies (kcal/mol), and Cartesian Coordinates (Å)

**2-ethynylcyclopropanethione (14)**

E = -590.983060512

ZPVE = 43.05633

|   |           |           |           |
|---|-----------|-----------|-----------|
| C | 0.237091  | 0.519188  | -0.498136 |
| C | -0.044515 | 0.425117  | 0.966005  |
| C | 1.378668  | 0.689005  | 0.398982  |
| S | -0.345211 | 0.412887  | -1.990025 |
| C | 1.791954  | 1.686017  | 0.545147  |
| C | 2.108446  | -0.117542 | 0.452521  |
| H | -0.532300 | 1.298881  | 1.401358  |
| H | -0.385491 | -0.837414 | 1.564427  |
| H | -0.672268 | -1.901257 | 2.059863  |
| H | -0.925621 | -2.841385 | 2.494522  |

**Table S.39** B3LYP/6-31G\* Uncorrected Energies (Hartree), Zero Point Vibrational Energies (kcal/mol), and Cartesian Coordinates (Å)

**4-thiabicyclo[3.1.0]hexa-2,5-diene (15)**

E = -590.979013030

ZPVE = 44.13261

|   |           |           |           |
|---|-----------|-----------|-----------|
| S | -1.198730 | -0.484549 | -0.592656 |
| C | -0.838419 | -0.121413 | 1.137695  |
| C | 0.440649  | 0.175221  | 1.437326  |
| C | 1.378685  | 0.038278  | 0.273847  |
| C | 0.454330  | -0.029423 | -0.919330 |
| C | 1.289973  | 0.976075  | -0.916295 |
| H | -1.673342 | -0.181993 | 1.827150  |
| H | 0.759911  | 0.354271  | 2.460533  |
| H | 1.501252  | 1.970980  | -1.284037 |
| H | 2.240559  | -0.622907 | 0.399386  |

**Table S.40** B3LYP/6-31G\* Uncorrected Energies (Hartree), Zero Point Vibrational Energies (kcal/mol), and Cartesian Coordinates (Å)

**(s-Z)-E-pent-2-en-4-ynal (16)**

E = -268.057404604

ZPVE = 44.63198

|   |           |           |           |
|---|-----------|-----------|-----------|
| C | 0.156966  | -0.000027 | -0.511425 |
| C | 0.060600  | -0.000015 | 0.836097  |
| H | 0.946733  | 0.000123  | 1.465580  |
| C | -1.260606 | -0.000171 | 1.496026  |
| H | -0.771322 | -0.000152 | -1.083140 |
| C | 1.372548  | 0.000141  | -1.234802 |
| C | 2.396870  | 0.000280  | -1.881823 |
| H | 3.303971  | 0.000404  | -2.443069 |
| H | -1.232576 | -0.000197 | 2.605966  |
| O | -2.325635 | -0.000179 | 0.903778  |

**Table S.41** B3LYP/6-31G\* Uncorrected Energies (Hartree), Zero Point Vibrational Energies (kcal/mol), and Cartesian Coordinates (Å)

**(s-E)-E-pent-2-en-4-ynal (16)**

E = -268.058742846

ZPVE = 44.57668

|   |           |           |           |
|---|-----------|-----------|-----------|
| O | -1.444613 | -0.004027 | -2.477961 |
| C | -1.342252 | -0.012490 | -1.265720 |
| C | -0.062020 | 0.003534  | -0.545609 |
| C | -0.036019 | -0.007413 | 0.804648  |
| C | 1.138515  | 0.006191  | 1.595425  |
| C | 2.124212  | 0.017270  | 2.299045  |
| H | 3.003070  | 0.027340  | 2.903630  |
| H | -0.984243 | -0.028343 | 1.345150  |
| H | 0.847219  | 0.024245  | -1.139841 |
| H | -2.243758 | -0.033571 | -0.611979 |

**Table S.42** B3LYP/6-31G\* Uncorrected Energies (Hartree), Zero Point Vibrational Energies (kcal/mol), and Cartesian Coordinates (Å)

**(s-Z)-Z-pent-2-en-4-ynal (17)**

E = -268.052691689

ZPVE = 44.64611

|   |           |           |           |
|---|-----------|-----------|-----------|
| C | 1.088595  | -0.000927 | -0.590814 |
| C | 1.148288  | -0.002874 | 0.761571  |
| H | 2.126859  | -0.004675 | 1.236017  |
| C | -0.017776 | -0.002491 | 1.664539  |
| H | 0.242232  | -0.005102 | 2.745443  |
| H | 2.030066  | -0.001137 | -1.140427 |
| C | -0.075492 | 0.002003  | -1.395765 |
| C | -0.993338 | 0.004568  | -2.186604 |
| H | -1.845222 | 0.006806  | -2.828371 |
| O | -1.181949 | 0.000304  | 1.308722  |

**Table S.43** B3LYP/6-31G\* Uncorrected Energies (Hartree), Zero Point Vibrational Energies (kcal/mol), and Cartesian Coordinates (Å)

**(s-E)-Z-pent-2-en-4-ynal (17)**

E = -268.056898484

ZPVE = 44.72311

|   |           |           |           |
|---|-----------|-----------|-----------|
| O | -0.055028 | 0.031129  | -2.583313 |
| C | -0.169430 | 0.014875  | -1.370552 |
| C | 0.982830  | 0.017102  | -0.455757 |
| C | 0.874780  | -0.000738 | 0.891994  |
| C | -0.338488 | -0.024012 | 1.630402  |
| C | -1.335844 | -0.044128 | 2.317399  |
| H | -2.226852 | -0.061762 | 2.903802  |
| H | 1.786208  | 0.002580  | 1.489006  |
| H | 1.964135  | 0.034312  | -0.921849 |
| H | -1.166351 | -0.002753 | -0.885374 |

**Table S.44** B3LYP/6-31G\* Uncorrected Energies (Hartree), Zero Point Vibrational Energies (kcal/mol), and Cartesian Coordinates (Å)

**propargyl ketene (18)**

E = -268.046614903

ZPVE = 44.40468

|   |           |           |           |
|---|-----------|-----------|-----------|
| C | 1.779707  | 0.644491  | -2.159384 |
| C | 1.340551  | 0.602028  | -1.035675 |
| C | 0.802266  | 0.567267  | 0.328518  |
| C | -0.712199 | 0.406438  | 0.365619  |
| C | -1.304031 | -0.640234 | 0.900130  |
| O | -1.826653 | -1.569554 | 1.389538  |
| H | 2.162525  | 0.673816  | -3.154193 |
| H | -1.345235 | 1.156137  | -0.097324 |
| H | 1.081563  | 1.493647  | 0.850046  |
| H | 1.276614  | -0.247102 | 0.889926  |

**Table S.45** B3LYP/6-31G\* Uncorrected Energies (Hartree), Zero Point Vibrational Energies (kcal/mol), and Cartesian Coordinates (Å)

**(*s-Z*)-(α-formyl)methylenecyclopropene (19)**

$$E = -268.036073667$$

$$\text{ZPVE} = 44.90026$$

|   |           |           |           |
|---|-----------|-----------|-----------|
| O | -1.752300 | -0.125702 | -1.028875 |
| C | -1.581152 | -0.670587 | 0.055671  |
| C | -0.359170 | -0.623552 | 0.844910  |
| C | 0.705859  | 0.066556  | 0.386327  |
| C | 2.036854  | 0.579281  | 0.430876  |
| C | 1.292993  | 0.877488  | -0.626770 |
| H | 2.980434  | 0.665849  | 0.951531  |
| H | 1.185380  | 1.373536  | -1.579664 |
| H | -0.316727 | -1.145062 | 1.796276  |
| H | -2.402992 | -1.263823 | 0.516765  |

**Table S.46** B3LYP/6-31G\* Uncorrected Energies (Hartree), Zero Point Vibrational Energies (kcal/mol), and Cartesian Coordinates (Å)

**(*s-E*)-(α-formyl)methylenecyclopropene (19)**

$$E = -268.035619450$$

$$\text{ZPVE} = 44.79678$$

|   |           |           |           |
|---|-----------|-----------|-----------|
| O | -0.836396 | 0.027631  | -2.570317 |
| C | -0.757831 | 0.010660  | -1.351411 |
| C | 0.478824  | 0.014484  | -0.589225 |
| C | 0.456562  | -0.005592 | 0.757640  |
| C | 1.084054  | -0.016872 | 2.043557  |
| C | -0.239309 | -0.032485 | 2.011302  |
| H | 1.991572  | -0.014467 | 2.630237  |
| H | -1.172960 | -0.051834 | 2.555168  |
| H | 1.421106  | 0.033870  | -1.128597 |
| H | -1.682358 | -0.009785 | -0.725443 |

**Table S.47** B3LYP/6-31G\* Uncorrected Energies (Hartree), Zero Point Vibrational Energies (kcal/mol), and Cartesian Coordinates (Å)

**4-oxacyclohexa-1,2,4-triene (20)**

E = -268.027820635

ZPVE = 46.75153

|   |           |           |           |
|---|-----------|-----------|-----------|
| C | -1.254420 | -0.205270 | -0.488901 |
| C | -0.978686 | 0.034622  | 0.829875  |
| O | 0.265992  | 0.211431  | 1.289089  |
| C | 1.300453  | -0.055858 | 1.300453  |
| C | 1.130201  | -0.044127 | -0.948408 |
| C | -0.181467 | 0.012226  | -1.399559 |
| H | 2.205480  | -0.250129 | 0.962855  |
| H | -0.421745 | 0.306473  | -2.423364 |
| H | -1.722954 | 0.166176  | 1.607053  |
| H | -2.285205 | -0.363518 | -0.793818 |

**Table S.48** B3LYP/6-31G\* Uncorrected Energies (Hartree), Zero Point Vibrational Energies (kcal/mol), and Cartesian Coordinates (Å)

**2-ethynylcyclopropanone (21)**

E = -268.019201813

ZPVE = 44.25621

|   |           |           |           |
|---|-----------|-----------|-----------|
| C | -0.020317 | 0.731036  | -0.862479 |
| C | 0.031367  | 0.413642  | 0.602984  |
| C | -0.824039 | 1.201437  | -0.366001 |
| O | -1.817533 | -1.149532 | -0.095687 |
| H | -1.393637 | 2.013387  | -1.393637 |
| H | -0.461622 | 1.396074  | -1.373770 |
| H | 0.066398  | 0.689871  | 1.650052  |
| C | 1.432075  | -0.034538 | 0.154209  |
| C | 2.514623  | -0.403383 | -0.236430 |
| H | 3.468719  | -0.731884 | -0.580843 |

**Table S.49** B3LYP/6-31G\* Uncorrected Energies (Hartree), Zero Point Vibrational Energies (kcal/mol), and Cartesian Coordinates (Å)

**(s-Z)-2-furyl carbene (triplet) (22)**

E = -268.00865915

ZPVE = 44.77567

|   |           |           |           |
|---|-----------|-----------|-----------|
| C | -1.246033 | 0.006198  | -0.762920 |
| C | -1.434452 | 0.009205  | 0.594750  |
| C | -0.149452 | 0.002709  | 1.181953  |
| C | 0.786277  | -0.004442 | 0.129362  |
| C | 2.151373  | -0.012409 | 0.109698  |
| O | 0.079402  | -0.002120 | -1.077226 |
| H | 2.931132  | -0.018060 | -0.635733 |
| H | 0.099825  | 0.002937  | 2.233338  |
| H | -2.387484 | 0.015543  | 1.105812  |
| H | -1.924967 | 0.008977  | -1.602670 |

**Table S.50** B3LYP/6-31G\* Uncorrected Energies (Hartree), Zero Point Vibrational Energies (kcal/mol), and Cartesian Coordinates (Å)

**(s-Z)-2-furyl carbene (singlet) (22)**

E = -268.014547

ZPVE = 45.49315

|   |           |           |          |
|---|-----------|-----------|----------|
| C | -0.565548 | -1.336945 | 0.000000 |
| C | 0.821539  | -1.312713 | 0.000000 |
| C | 1.164911  | 0.042351  | 0.000000 |
| C | 0.000000  | 0.826765  | 0.000000 |
| C | -0.149348 | 2.193971  | 0.000000 |
| O | -1.097841 | -0.132105 | 0.000000 |
| H | -1.224257 | 2.449447  | 0.000000 |
| H | 2.155840  | 0.475545  | 0.000000 |
| H | 1.474955  | -2.173680 | 0.000000 |
| H | -1.253136 | -2.175045 | 0.000000 |



**Table S.51** B3LYP/6-31G\* Uncorrected Energies (Hartree), Zero Point Vibrational Energies (kcal/mol), and Cartesian Coordinates (Å)

**(*s-E*)-2-furyl carbene (triplet) (22)**

E = -268.008539619

ZPVE = 44.85671

|   |           |           |           |
|---|-----------|-----------|-----------|
| C | -1.214680 | 0.009688  | -0.840757 |
| C | -1.454666 | 0.006082  | 0.508552  |
| C | -0.191998 | -0.002240 | 1.143226  |
| C | 0.781303  | -0.004983 | 0.120501  |
| C | 2.147633  | -0.012353 | 0.140558  |
| O | 0.002673  | 0.002673  | -1.103516 |
| H | 2.900307  | -0.018300 | 0.913647  |
| H | 0.016960  | -0.006260 | 2.203482  |
| H | -2.426012 | 0.009762  | 0.984210  |
| H | -1.860863 | 0.016261  | -1.705684 |

**Table S.52** B3LYP/6-31G\* Uncorrected Energies (Hartree), Zero Point Vibrational Energies (kcal/mol), and Cartesian Coordinates (Å)

**(*s-E*)-2-furyl carbene (singlet) (22)**

E = -268.01185094

ZPVE = 45.65862

|   |           |           |           |
|---|-----------|-----------|-----------|
| C | -1.207228 | 0.009035  | -0.812943 |
| C | -1.440022 | 0.005010  | 0.555561  |
| C | -0.169550 | -0.002955 | 1.137201  |
| C | 0.808024  | -0.004150 | 0.124348  |
| C | 2.186953  | -0.011808 | 0.029362  |
| O | 0.075345  | 0.003807  | -1.107128 |
| H | 2.567326  | -0.016986 | 1.069306  |
| H | 0.063642  | -0.007556 | 2.194277  |
| H | -2.406320 | 0.007854  | 1.040629  |
| H | -1.896469 | 0.015447  | -1.648357 |

**Table S.53** B3LYP/6-31G\* Uncorrected Energies (Hartree), Zero Point Vibrational Energies (kcal/mol), and Cartesian Coordinates (Å)

**(s-Z)-3-furyl carbene (triplet) (23)**

E = -268.001020802

ZPVE = 44.99565

|   |           |           |           |
|---|-----------|-----------|-----------|
| C | -1.036030 | 0.004390  | -1.081642 |
| C | -1.143781 | -0.003692 | 0.265436  |
| C | 0.215305  | -0.004382 | 0.798886  |
| C | 1.027569  | 0.004049  | -0.339200 |
| C | 0.597914  | -0.011644 | 2.131635  |
| O | 0.276203  | 0.009258  | -1.475616 |
| H | -1.759332 | 0.007668  | -1.883165 |
| H | -2.054030 | -0.008785 | 0.847621  |
| H | 1.539831  | -0.012767 | 2.663197  |
| H | 2.098042  | 0.007491  | -0.473412 |

**Table S.54** B3LYP/6-31G\* Uncorrected Energies (Hartree), Zero Point Vibrational Energies (kcal/mol), and Cartesian Coordinates (Å)

**(s-Z)-3-furyl carbene (singlet) (23)**

E = -267.995922135

ZPVE = 45.39890

|   |           |           |           |
|---|-----------|-----------|-----------|
| C | -1.021673 | 0.004496  | -1.103651 |
| C | -1.156569 | -0.003378 | 0.237156  |
| C | 0.188531  | -0.004262 | 0.806280  |
| C | 1.022202  | 0.003569  | -0.311788 |
| C | 0.531374  | -0.011537 | 2.188280  |
| O | 0.330373  | 0.008829  | -1.448128 |
| H | -1.697130 | 0.008103  | -1.944654 |
| H | -2.074035 | -0.008240 | 0.808173  |
| H | 1.644683  | -0.009820 | 2.230142  |
| H | 2.100304  | 0.005997  | -0.406303 |

**Table S.55** B3LYP/6-31G\* Uncorrected Energies (Hartree), Zero Point Vibrational Energies (kcal/mol), and Cartesian Coordinates (Å)

**(*s-E*)-3-furyl carbene (triplet) (23)**

E = -268.001170103

ZPVE = 44.94363

|   |           |           |           |
|---|-----------|-----------|-----------|
| C | -0.945160 | 0.004741  | -1.142625 |
| C | -1.125904 | -0.003285 | 0.196824  |
| C | 0.207915  | -0.004068 | 0.801064  |
| C | 1.075453  | 0.003629  | -0.291512 |
| C | 0.535461  | -0.011264 | 2.148773  |
| O | 0.385149  | 0.009018  | -1.465758 |
| H | -1.625475 | 0.008204  | -1.981208 |
| H | -2.067306 | -0.008197 | 0.727453  |
| H | -0.026377 | -0.017419 | 3.072533  |
| H | 2.151374  | 0.006748  | -0.367864 |

**Table S.56** B3LYP/6-31G\* Uncorrected Energies (Hartree), Zero Point Vibrational Energies (kcal/mol), and Cartesian Coordinates (Å)

**(*s-E*)-3-furyl carbene (singlet) (23)**

E = -267.998171927

ZPVE = 45.49664

|   |           |           |           |
|---|-----------|-----------|-----------|
| C | -0.987125 | 0.004396  | -1.127338 |
| C | -1.152744 | -0.003439 | 0.209610  |
| C | 0.186319  | -0.004031 | 0.807084  |
| C | 1.038895  | 0.003679  | -0.295452 |
| C | 0.713521  | -0.010382 | 2.125747  |
| O | 0.371964  | 0.008624  | -1.444788 |
| H | -1.645198 | 0.007949  | -1.982644 |
| H | -2.092818 | -0.008290 | 0.744075  |
| H | -0.149604 | -0.016207 | 2.827669  |
| H | 2.118706  | 0.006215  | -0.348698 |

**Table S.57** B3LYP/6-31G\* Uncorrected Energies (Hartree), Zero Point Vibrational Energies (kcal/mol), and Cartesian Coordinates (Å)

**2-oxabicyclo[3.1.0]hexa-3,5-diene (24)**

E = -267.998433618

ZPVE = 45.89506

|   |           |           |           |
|---|-----------|-----------|-----------|
| C | -1.087760 | 0.044759  | -0.837655 |
| C | -1.267621 | 0.315502  | 0.486506  |
| C | 0.070807  | 0.172344  | 1.008495  |
| C | 1.040178  | 0.250385  | -0.111914 |
| O | 0.185476  | -0.098106 | -1.276880 |
| C | 1.136186  | -0.613068 | 1.070103  |
| H | -1.849901 | -0.170194 | -1.578339 |
| H | -2.210134 | 0.399487  | 1.007189  |
| H | 1.524890  | -1.531180 | 1.491061  |
| H | 1.700588  | 1.067205  | -0.398082 |

**Table S.58** B3LYP/6-31G\* Uncorrected Energies (Hartree), Zero Point Vibrational Energies (kcal/mol), and Cartesian Coordinates (Å)

**4-oxabicyclo[3.1.0]hexa-2,5-diene (25)**

E = -267.980564699

ZPVE = 45.85743

|   |           |           |           |
|---|-----------|-----------|-----------|
| O | -1.228878 | -0.141102 | -0.523793 |
| C | -1.030672 | -0.338301 | 0.846856  |
| C | 0.256853  | -0.326566 | 1.251870  |
| C | 1.114397  | -0.248120 | 0.023552  |
| C | 0.060066  | 0.069266  | -0.947033 |
| C | 0.972780  | 1.010890  | -0.917336 |
| H | -1.951943 | -0.504020 | 1.388176  |
| H | 0.574153  | -0.512504 | 2.270757  |
| H | 1.032340  | 2.092050  | -0.895158 |
| H | 1.935930  | -0.949732 | -0.120883 |

**Table S.59** B3LYP/6-31G\* Uncorrected Energies (Hartree), Zero Point Vibrational Energies (kcal/mol), and Cartesian Coordinates (Å)

**(s-E)-penta-2,3,4-trienal (26)**

E = -268.056021576

ZPVE = 44.54690

|   |           |          |           |
|---|-----------|----------|-----------|
| O | -0.867958 | 0.000000 | -2.801218 |
| C | -0.810471 | 0.000000 | -1.585887 |
| C | 0.459182  | 0.000000 | -0.834036 |
| C | 0.481151  | 0.000000 | 0.493749  |
| H | -1.726181 | 0.000000 | -0.958424 |
| H | 1.375914  | 0.000000 | -1.421860 |
| C | 0.468819  | 0.000000 | 1.761419  |
| C | 0.463278  | 0.000000 | 3.080048  |
| H | -0.466316 | 0.000000 | 3.645509  |
| H | 1.388494  | 0.000000 | 3.652760  |

**Table S.60** B3LYP/6-31G\* Uncorrected Energies (Hartree), Zero Point Vibrational Energies (kcal/mol), and Cartesian Coordinates (Å)

**(s-Z)-penta-2,3,4-trienal (26)**

E = -268.051997686

ZPVE = 44.56577

|   |           |          |           |
|---|-----------|----------|-----------|
| O | -2.092817 | 0.000000 | -0.842680 |
| C | -1.956487 | 0.000000 | 0.365324  |
| C | -0.659528 | 0.000000 | 1.080885  |
| C | 0.510906  | 0.000000 | 0.452908  |
| H | -2.839482 | 0.000000 | 1.040208  |
| H | -0.698130 | 0.000000 | 2.170221  |
| C | 1.621235  | 0.000000 | -0.155699 |
| C | 2.773873  | 0.000000 | -0.796749 |
| H | 2.816849  | 0.000000 | -1.884023 |
| H | 3.723311  | 0.000000 | -0.264983 |

**Table S.61** B3LYP/6-31G\* Uncorrected Energies (Hartree), Zero Point Vibrational Energies (kcal/mol), and Cartesian Coordinates (Å)

**(s-E)-pent-1-en-4-yn-3-one (27)**

E = -268.052183662

ZPVE = 44.51333

|   |           |          |           |
|---|-----------|----------|-----------|
| H | 1.262562  | 0.000000 | -3.038760 |
| C | 1.281003  | 0.000000 | -1.953167 |
| H | 2.249262  | 0.000000 | -1.460465 |
| C | 0.157551  | 0.000000 | -1.228341 |
| H | -0.825511 | 0.000000 | -1.692509 |
| C | 0.207852  | 0.000000 | 0.207852  |
| O | 1.251410  | 0.000000 | 0.899120  |
| C | -1.085105 | 0.000000 | 0.934310  |
| C | -2.160955 | 0.000000 | 1.487229  |
| H | -3.099677 | 0.000000 | 1.995329  |

**Table S.62** B3LYP/6-31G\* Uncorrected Energies (Hartree), Zero Point Vibrational Energies (kcal/mol), and Cartesian Coordinates (Å)

**1-ethynyl-3-oxacyclobutene (28)**

E = -268.016013

ZPVE = 45.468047

|   |           |           |           |
|---|-----------|-----------|-----------|
| C | 0.000000  | 0.133189  | 0.000000  |
| C | -0.471121 | -1.315130 | 0.000000  |
| O | 0.951534  | -1.716607 | 0.000000  |
| C | 1.253728  | -0.372390 | 0.000000  |
| H | -0.967253 | -1.679995 | 0.902857  |
| H | 2.282051  | -0.028459 | 0.000000  |
| H | -0.967253 | -1.679995 | -0.902857 |
| C | -0.628340 | 1.385780  | 0.000000  |
| C | -1.198992 | 2.455317  | 0.000000  |
| H | -1.691460 | 3.400711  | 0.000000  |

**Table S.63** B3LYP/6-31G\* Uncorrected Energies (Hartree), Zero Point Vibrational Energies (kcal/mol), and Cartesian Coordinates (Å)

**4-ethynyl-3-oxacyclobutene (29)**

E = -268.001778290

ZPVE = 45.06897

|   |           |           |           |
|---|-----------|-----------|-----------|
| C | -0.113225 | 0.598765  | -1.301578 |
| C | -0.270887 | 0.490163  | 0.209685  |
| O | 1.222070  | 0.497618  | 0.293586  |
| C | 1.206529  | 0.608236  | -1.089702 |
| H | -0.638564 | 1.395575  | 0.704433  |
| H | 2.135550  | 0.686224  | -1.643559 |
| H | -0.795606 | 0.637603  | -2.135442 |
| C | -0.863427 | -0.706725 | 0.776895  |
| C | -1.396626 | -1.681384 | 1.249272  |
| H | -1.852118 | -2.554677 | 1.658437  |

**Table S.64** B3LYP/6-31G\* Uncorrected Energies (Hartree), Zero Point Vibrational Energies (kcal/mol), and Cartesian Coordinates (Å)

**allenyl ethynyl ether (30)**

E = -267.982337428

ZPVE = 43.57935

|   |           |           |           |
|---|-----------|-----------|-----------|
| H | 2.030607  | 3.028296  | -0.120754 |
| C | 1.109817  | 2.720515  | 0.373811  |
| H | 0.525858  | 3.509121  | 0.525858  |
| C | 0.723794  | 1.473260  | 0.393276  |
| C | 0.357298  | 0.220983  | 0.445585  |
| H | 0.640745  | -0.472783 | 1.230699  |
| O | -0.463252 | -0.332506 | -0.554883 |
| C | -0.779718 | -1.595841 | -0.419317 |
| C | -1.096146 | -2.756403 | -0.334735 |
| H | -1.381464 | -3.779663 | -0.269990 |

**Table S.65** B3LYP/6-31G\* Uncorrected Energies (Hartree), Zero Point Vibrational Energies (kcal/mol), and Cartesian Coordinates (Å)

**ethynyl prop-2-ynyl ether (31)**

E = -267.973904028

ZPVE = 43.73710

|   |           |           |           |
|---|-----------|-----------|-----------|
| H | 0.797020  | -0.028395 | -3.878277 |
| C | 0.727896  | -0.019707 | -2.816369 |
| C | 0.682883  | -0.009633 | -1.610216 |
| O | 0.650539  | 0.001423  | -0.302566 |
| C | -0.700572 | -0.002980 | 0.248515  |
| H | -1.219945 | -0.898925 | -0.112636 |
| H | -1.232362 | 0.878904  | -0.128825 |
| C | -0.620721 | 0.010836  | 1.700391  |
| C | -0.589358 | 0.022278  | 2.905759  |
| H | -0.549784 | 0.032262  | 3.971783  |

**Table S.66** B3LYP/6-31G\* Uncorrected Energies (Hartree), Zero Point Vibrational Energies (kcal/mol), and Cartesian Coordinates (Å)

**ethynyl prop-1-ynyl ether (32)**

E = -267.965254406

ZPVE = 43.81419

|   |           |           |           |
|---|-----------|-----------|-----------|
| H | -0.071017 | -1.814521 | -3.480357 |
| C | -0.037875 | -1.617041 | -2.434640 |
| C | -0.000789 | -1.382317 | -1.255550 |
| O | 0.044007  | -1.225618 | 0.057883  |
| C | 0.020445  | 0.017615  | 0.534955  |
| C | 0.004085  | 1.101464  | 1.058338  |
| C | -0.018728 | 2.424962  | 1.677468  |
| H | 0.992903  | 2.776019  | 1.913138  |
| H | -0.595172 | 2.413411  | 2.609979  |
| H | -0.481596 | 3.161939  | 1.010756  |



**Table S.67** B3LYP/6-31G\* Uncorrected Energies (Hartree), Zero Point Vibrational Energies (kcal/mol), and Cartesian Coordinates (Å)

**3-cyclopropenyl ethynyl ether (33)**

E = -267.959912743

ZPVE = 43.65893

|   |           |           |           |
|---|-----------|-----------|-----------|
| C | -1.175074 | 0.117694  | -1.182711 |
| C | -1.484185 | 0.763383  | -0.088721 |
| C | -0.132242 | 0.989255  | -0.621250 |
| O | 1.066683  | 0.449400  | 0.036141  |
| H | 0.217361  | 1.916366  | -1.069664 |
| H | -2.198581 | 0.983142  | 0.691395  |
| H | -1.449600 | -0.581372 | -1.959357 |
| C | 0.945365  | -0.682758 | 0.670103  |
| C | 0.860510  | -1.731073 | 1.264881  |
| H | 0.811116  | -2.652345 | 1.794692  |

**Table S.68** B3LYP/6-31G\* Uncorrected Energies (Hartree), Zero Point Vibrational Energies (kcal/mol), and Cartesian Coordinates (Å)

**(3-thienyl)diazirine (34)**

E = -700.534882342

ZPVE = 51.21966

|   |          |          |          |
|---|----------|----------|----------|
| S | -1.88398 | 0.019251 | -1.30028 |
| C | -1.86037 | -0.38169 | 0.387456 |
| C | -0.59996 | -0.31053 | 0.906835 |
| C | 0.383095 | 0.075492 | -0.06683 |
| C | -0.17361 | 0.285881 | -1.30494 |
| C | 1.819141 | 0.232444 | 0.20838  |
| N | 2.27096  | 0.615634 | 1.570392 |
| N | 2.454555 | -0.56703 | 1.286873 |
| H | -2.77756 | -0.64601 | 0.896115 |
| H | -0.36858 | -0.52331 | 1.944229 |
| H | 0.329267 | 0.582318 | -2.21585 |
| H | 2.472153 | 0.529123 | -0.60631 |

**Table S.69** B3LYP/6-31G\* Uncorrected Energies (Hartree), Zero Point Vibrational Energies (kcal/mol), and Cartesian Coordinates (Å)

**6aH-thieno[2,3-c]pyrazole (35)**

E = -700.530124494

ZPVE = 51.98501

|   |          |          |          |
|---|----------|----------|----------|
| S | -0.12669 | 0.059281 | 0.026258 |
| C | 0.04403  | -0.04414 | 1.787298 |
| C | 1.294206 | 0.131997 | 2.284805 |
| C | 2.24836  | 0.347349 | 1.2284   |
| C | 1.597165 | 0.7293   | -0.05952 |
| C | 3.530134 | 0.075735 | 0.884867 |
| N | 3.683564 | 0.168798 | -0.52783 |
| N | 2.589086 | 0.450119 | -1.11107 |
| H | -0.84685 | -0.25788 | 2.368307 |
| H | 1.540729 | 0.025492 | 3.334949 |
| H | 1.47047  | 1.821419 | -0.1271  |
| H | 4.377555 | -0.22955 | 1.483418 |

**Table S.70** B3LYP/6-31G\* Uncorrected Energies (Hartree), Zero Point Vibrational Energies (kcal/mol), and Cartesian Coordinates (Å)

**3H-thieno[2,3-c]pyrazole (36)**

E = -700.557835098

ZPVE = 52.27689

|   |          |          |          |
|---|----------|----------|----------|
| S | -1.70357 | -0.06202 | -0.57054 |
| C | -1.69707 | 0.280714 | 1.142922 |
| C | -0.43492 | 0.350363 | 1.68405  |
| C | 0.559616 | 0.122494 | 0.697681 |
| C | 0.027162 | -0.1101  | -0.54595 |
| N | 2.153405 | -0.26462 | -0.99267 |
| H | -2.64126 | 0.412267 | 1.655754 |
| H | -0.25155 | 0.554667 | 2.732918 |
| C | 2.02924  | 0.032395 | 0.472356 |
| H | 2.587937 | 0.956241 | 0.668629 |
| H | 2.534891 | -0.77609 | 1.015337 |
| N | 1.007003 | -0.33681 | -1.5288  |

**Table S.71** B3LYP/6-31G\* Uncorrected Energies (Hartree), Zero Point Vibrational Energies (kcal/mol), and Cartesian Coordinates (Å)

**1H-thieno[2,3-c]pyrazole (37)**

E = -700.585329634

ZPVE = 53.37376

|   |          |          |          |
|---|----------|----------|----------|
| S | -0.02131 | 0.139258 | 0.009655 |
| C | 0.059692 | 0.007772 | 1.777128 |
| C | 1.327359 | 0.033361 | 2.270068 |
| C | 2.308615 | 0.1622   | 1.228296 |
| C | 1.714699 | 0.229448 | -0.03299 |
| C | 3.699445 | 0.25356  | 0.9524   |
| N | 3.935486 | 0.365752 | -0.35159 |
| N | 2.706885 | 0.349903 | -0.94641 |
| H | -0.87025 | -0.08058 | 2.322967 |
| H | 1.55001  | -0.03656 | 3.328881 |
| H | 4.53525  | 0.243487 | 1.639569 |
| H | 2.650634 | 0.424469 | -1.94992 |

**Table S.72** B3LYP/6-31G\* (unscaled) Computed Vibrational Frequencies and Intensities

**(s-Z)-3-thienyldiazomethane (1)**

| Frequency (cm <sup>-1</sup> ) | Intensity (Km/mol) | Symmetry |
|-------------------------------|--------------------|----------|
| 67.9948                       | 0.6952             | A''      |
| 115.1815                      | 1.3535             | A'       |
| 243.4098                      | 7.5597             | A''      |
| 334.367                       | 2.454              | A'       |
| 441.8484                      | 3.5564             | A''      |
| 462.7147                      | 0.0363             | A'       |
| 501.742                       | 33.0661            | A''      |
| 518.8187                      | 2.9114             | A''      |
| 620.9694                      | 6.7952             | A'       |
| 640.6707                      | 3.6921             | A''      |
| 665.6771                      | 0.3828             | A''      |
| 717.4506                      | 9.8269             | A'       |
| 774.5411                      | 86.5153            | A''      |
| 845.1619                      | 21.8562            | A'       |
| 880.9808                      | 4.8958             | A'       |
| 884.2482                      | 0.8031             | A''      |
| 975.2918                      | 2.6311             | A'       |
| 1120.69                       | 5.3865             | A'       |
| 1168.734                      | 2.9248             | A'       |
| 1231.921                      | 4.7109             | A'       |
| 1248.395                      | 9.0477             | A'       |
| 1380.264                      | 0.9202             | A'       |
| 1462.126                      | 22.8486            | A'       |
| 1491.213                      | 19.2361            | A'       |
| 1595.96                       | 17.9079            | A'       |
| 2192.98                       | 648.0729           | A'       |
| 3219.813                      | 5.6485             | A'       |
| 3240.45                       | 4.3451             | A'       |
| 3267.048                      | 1.6796             | A'       |
| 3273.904                      | 0.8701             | A'       |

**Table S.73** B3LYP/6-31G\* (unscaled) Computed Vibrational Frequencies and Intensities

**(*s-E*)-3-thienyldiazomethane (1)**

| Frequency (cm <sup>-1</sup> ) | Intensity (Km/mol) | Symmetry |
|-------------------------------|--------------------|----------|
| 68.2344                       | 1.2956             | A''      |
| 124.7495                      | 3.0647             | A'       |
| 236.7713                      | 6.5194             | A''      |
| 328.3994                      | 1.5697             | A'       |
| 446.3139                      | 1.5169             | A''      |
| 453.2039                      | 0.075              | A'       |
| 512.4703                      | 2.9643             | A''      |
| 515.7405                      | 33.3387            | A''      |
| 637.1866                      | 2.5489             | A'       |
| 643.5547                      | 2.5313             | A''      |
| 668.709                       | 0                  | A''      |
| 736.6116                      | 8.5787             | A'       |
| 775.8217                      | 90.4222            | A''      |
| 833.4447                      | 5.4728             | A'       |
| 864.9622                      | 21.3979            | A'       |
| 887.9528                      | 0.351              | A''      |
| 948.0424                      | 4.3855             | A'       |
| 1123.189                      | 5.4359             | A'       |
| 1172.032                      | 2.3461             | A'       |
| 1226.495                      | 2.544              | A'       |
| 1281.193                      | 9.9472             | A'       |
| 1403.813                      | 13.3034            | A'       |
| 1430.589                      | 6.0949             | A'       |
| 1492.699                      | 1.2137             | A'       |
| 1603.769                      | 31.7335            | A'       |
| 2191.371                      | 706.7952           | A'       |
| 3223.512                      | 1.887              | A'       |
| 3238.904                      | 3.9907             | A'       |
| 3267.568                      | 2.2943             | A'       |
| 3273.589                      | 0.5409             | A'       |

**Table S.74** B3LYP/6-31G\* (unscaled) Computed Vibrational Frequencies and Intensities

**(s-Z)-2-thienyldiazomethane (2)**

| Frequency (cm <sup>-1</sup> ) | Intensity (Km/mol) | Symmetry |
|-------------------------------|--------------------|----------|
| 61.5525                       | 0.4324             | A''      |
| 114.9224                      | 1.5774             | A'       |
| 232.0754                      | 4.6913             | A'       |
| 320.3136                      | 1.5365             | A''      |
| 442.0645                      | 11.6018            | A'       |
| 462.5427                      | 0.0749             | A''      |
| 496.7696                      | 14.0781            | A'       |
| 543.8082                      | 5.7719             | A''      |
| 581.287                       | 11.7111            | A''      |
| 654.1297                      | 0.8339             | A''      |
| 672.7584                      | 9.1493             | A'       |
| 683.6408                      | 56.9655            | A'       |
| 753.8615                      | 3.9393             | A''      |
| 809.3561                      | 20.4494            | A'       |
| 859.3568                      | 7.3098             | A''      |
| 902.1479                      | 0.1619             | A'       |
| 1074.522                      | 3.5267             | A'       |
| 1113.854                      | 2.9485             | A'       |
| 1174.511                      | 1.3543             | A'       |
| 1246.443                      | 0.0405             | A'       |
| 1260.62                       | 7.7564             | A'       |
| 1362.92                       | 0.9245             | A'       |
| 1446.08                       | 0.8146             | A'       |
| 1512.818                      | 29.5981            | A'       |
| 1587.891                      | 38.508             | A'       |
| 2188.473                      | 722.5566           | A'       |
| 3216.336                      | 10.2289            | A'       |
| 3230.525                      | 10.0659            | A'       |
| 3234.881                      | 2.4761             | A'       |
| 3276.541                      | 0.445              | A'       |

**Table S.75** B3LYP/6-31G\* (unscaled) Computed Vibrational Frequencies and Intensities

**(s-E)-2-thienyldiazomethane (2)**

| Frequency (cm <sup>-1</sup> ) | Intensity (Km/mol) | Symmetry |
|-------------------------------|--------------------|----------|
| 51.2505                       | 1.7536             | A''      |
| 121.444                       | 2.1919             | A'       |
| 230.6631                      | 5.9085             | A''      |
| 302.0054                      | 1.3669             | A'       |
| 455.3316                      | 0.4133             | A'       |
| 471.5209                      | 23.3246            | A''      |
| 493.2055                      | 5.188              | A''      |
| 528.3816                      | 14.3764            | A''      |
| 575.4642                      | 10.5605            | A''      |
| 596.6012                      | 2.0548             | A'       |
| 682.7846                      | 47.1987            | A''      |
| 740.0267                      | 1.3275             | A'       |
| 806.6708                      | 16.7025            | A''      |
| 822.0989                      | 18.5787            | A'       |
| 854.7316                      | 21.1042            | A'       |
| 902.9899                      | 0.0407             | A'       |
| 1061.796                      | 7.6103             | A''      |
| 1104.787                      | 4.1004             | A'       |
| 1138.437                      | 4.3303             | A'       |
| 1222.348                      | 4.7235             | A'       |
| 1281.227                      | 2.5325             | A'       |
| 1400.309                      | 0.0648             | A'       |
| 1444.138                      | 22.9093            | A'       |
| 1506.891                      | 28.6863            | A'       |
| 1585.674                      | 23.5275            | A'       |
| 2191.352                      | 747.6351           | A'       |
| 3217.355                      | 8.3076             | A'       |
| 3230.922                      | 5.0639             | A'       |
| 3242.866                      | 6.4851             | A'       |
| 3276.558                      | 0.9239             | A'       |

**Table S.76** B3LYP/6-31G\* (unscaled) Computed Vibrational Frequencies and Intensities

**(s-Z)-3-furyldiazomethane (3)**

| Frequency (cm <sup>-1</sup> ) | Intensity (Km/mol) | Symmetry |
|-------------------------------|--------------------|----------|
| 59.3634                       | 0.8037             | A''      |
| 120.2299                      | 1.4573             | A'       |
| 283.2808                      | 7.9281             | A''      |
| 339.8381                      | 2.5308             | A'       |
| 490.624                       | 33.5189            | A''      |
| 496.5291                      | 0.1551             | A'       |
| 515.7408                      | 5.5347             | A''      |
| 609.5514                      | 9.1838             | A''      |
| 643.212                       | 0.5736             | A''      |
| 701.7831                      | 0.6946             | A''      |
| 761.6543                      | 65.3438            | A''      |
| 766.6645                      | 30.6482            | A'       |
| 835.9544                      | 4.7888             | A''      |
| 890.6266                      | 20.3563            | A'       |
| 1000.103                      | 1.2522             | A'       |
| 1065.616                      | 21.9174            | A'       |
| 1104.642                      | 19.6156            | A'       |
| 1202.397                      | 2.1485             | A'       |
| 1220.24                       | 31.7613            | A'       |
| 1249.713                      | 17.1404            | A'       |
| 1288.383                      | 5.3728             | A'       |
| 1397.657                      | 0.6282             | A'       |
| 1467.877                      | 28.719             | A'       |
| 1556.188                      | 9.5135             | A'       |
| 1637.264                      | 7.945              | A'       |
| 2193.18                       | 570.7618           | A'       |
| 3242.779                      | 5.1859             | A'       |
| 3266.039                      | 1.5935             | A'       |
| 3300.284                      | 1.6675             | A'       |
| 3305.091                      | 0.5694             | A'       |



**Table S.77** B3LYP/6-31G\* (unscaled) Computed Vibrational Frequencies and Intensities

**(*s-E*)-3-furyldiazomethane (3)**

| Frequency (cm <sup>-1</sup> ) | Intensity (Km/mol) | Symmetry |
|-------------------------------|--------------------|----------|
| 72.4341                       | 1.7422             | A''      |
| 123.8016                      | 3.2081             | A'       |
| 270.527                       | 7.1273             | A''      |
| 340.3996                      | 1.4817             | A'       |
| 500.8832                      | 0.31               | A'       |
| 509.7103                      | 7.6095             | A''      |
| 515.5509                      | 31.9401            | A''      |
| 608.867                       | 10.274             | A''      |
| 643.2145                      | 0.5804             | A''      |
| 705.9543                      | 1.9367             | A''      |
| 758.9425                      | 10.8418            | A'       |
| 764.4992                      | 66.3674            | A''      |
| 839.0708                      | 3.3673             | A''      |
| 888.786                       | 30.3699            | A'       |
| 982.1826                      | 5.5697             | A'       |
| 1067.875                      | 18.0401            | A'       |
| 1102.404                      | 27.5327            | A'       |
| 1208.482                      | 9.1488             | A'       |
| 1219.656                      | 24.1074            | A'       |
| 1261.307                      | 1.0033             | A'       |
| 1300.322                      | 4.2796             | A'       |
| 1409.967                      | 17.6207            | A'       |
| 1447.709                      | 7.8772             | A'       |
| 1554.963                      | 1.8325             | A'       |
| 1646.114                      | 13.2472            | A'       |
| 2193.915                      | 624.7275           | A'       |
| 3237.677                      | 3.9354             | A'       |
| 3267.15                       | 0.5494             | A'       |
| 3299.705                      | 1.8306             | A'       |
| 3305.011                      | 0.224              | A'       |

**Table S.78** B3LYP/6-31G\* (unscaled) Computed Vibrational Frequencies and Intensities

**(s-Z)-2-furyldiazomethane (4)**

| Frequency (cm <sup>-1</sup> ) | Intensity (Km/mol) | Symmetry |
|-------------------------------|--------------------|----------|
| 72.3094                       | 0.0565             | A''      |
| 122.3977                      | 1.351              | A'       |
| 250.9248                      | 8.4059             | A''      |
| 347.6685                      | 2.7145             | A'       |
| 491.4539                      | 3.0899             | A''      |
| 505.0006                      | 1.0656             | A'       |
| 506.0435                      | 30.019             | A''      |
| 603.5326                      | 5.7695             | A''      |
| 671.3991                      | 16.7524            | A''      |
| 713.5283                      | 26.0695            | A''      |
| 774.6244                      | 8.3681             | A'       |
| 778.77                        | 39.2023            | A''      |
| 857.3926                      | 0.0997             | A''      |
| 899.4584                      | 7.7351             | A'       |
| 949.9972                      | 13.0447            | A'       |
| 1042.259                      | 18.4323            | A'       |
| 1106.112                      | 0.3689             | A'       |
| 1182.4                        | 4.046              | A'       |
| 1198.707                      | 1.5697             | A'       |
| 1245.643                      | 0.421              | A'       |
| 1292.512                      | 8.8606             | A'       |
| 1409.988                      | 0.0131             | A'       |
| 1436.39                       | 3.7479             | A'       |
| 1564.267                      | 20.9292            | A'       |
| 1638.349                      | 65.0334            | A'       |
| 2201.824                      | 735.8133           | A'       |
| 3254.257                      | 5.0751             | A'       |
| 3265.268                      | 7.4192             | A'       |
| 3277.267                      | 1.1023             | A'       |
| 3309.883                      | 0.275              | A'       |

**Table S.79** B3LYP/6-31G\* (unscaled) Computed Vibrational Frequencies and Intensities

**(*s-E*)-2-furyldiazomethane (4)**

| Frequency (cm <sup>-1</sup> ) | Intensity (Km/mol) | Symmetry |
|-------------------------------|--------------------|----------|
| 56.9148                       | 1.4249             | A''      |
| 124.8033                      | 2.4959             | A'       |
| 258.7831                      | 11.466             | A''      |
| 350.1311                      | 2.1281             | A'       |
| 488.6428                      | 11.2276            | A''      |
| 498.9758                      | 0.9367             | A'       |
| 500.6121                      | 28.6373            | A''      |
| 603.4963                      | 3.3106             | A''      |
| 670.2043                      | 17.3448            | A''      |
| 714.096                       | 23.0989            | A''      |
| 766.3146                      | 15.5013            | A'       |
| 777.2369                      | 31.691             | A''      |
| 857.1539                      | 0.3028             | A''      |
| 899.577                       | 4.9867             | A'       |
| 970.0631                      | 6.4009             | A'       |
| 1040.204                      | 25.6445            | A'       |
| 1112.56                       | 9.0079             | A'       |
| 1165.095                      | 3.173              | A'       |
| 1210.119                      | 0.0152             | A'       |
| 1229.868                      | 7.374              | A'       |
| 1275.198                      | 0.349              | A'       |
| 1406.712                      | 4.4653             | A'       |
| 1476.085                      | 23.8639            | A'       |
| 1551.21                       | 17.6665            | A'       |
| 1629.159                      | 34.9201            | A'       |
| 2197.736                      | 721.4159           | A'       |
| 3251.789                      | 7.8303             | A'       |
| 3264.888                      | 6.9082             | A'       |
| 3276.539                      | 0.5917             | A'       |
| 3308.817                      | 0.3374             | A'       |

**Table S.80** B3LYP/6-31G\* (unscaled) Computed Vibrational Frequencies and Intensities

**(s-Z)-E-pent-2-en-4-ynethial (5)**

| Frequency (cm <sup>-1</sup> ) | Intensity (Km/mol) | Symmetry |
|-------------------------------|--------------------|----------|
| 113.4619                      | 0.0695             | A''      |
| 129.9601                      | 0.5332             | A'       |
| 209.5252                      | 4.6920             | A''      |
| 238.7765                      | 1.6417             | A'       |
| 453.5988                      | 0.2093             | A''      |
| 491.3680                      | 5.6945             | A'       |
| 618.3954                      | 48.8150            | A'       |
| 624.9773                      | 41.4990            | A''      |
| 626.5890                      | 21.2564            | A'       |
| 830.5196                      | 18.1436            | A''      |
| 893.9276                      | 3.4002             | A'       |
| 940.7766                      | 9.5219             | A''      |
| 1009.2095                     | 17.0070            | A''      |
| 1063.4628                     | 23.0222            | A'       |
| 1178.1559                     | 92.2518            | A'       |
| 1297.9323                     | 67.4517            | A'       |
| 1339.5577                     | 6.0182             | A'       |
| 1416.1371                     | 63.8249            | A'       |
| 1644.1315                     | 130.5609           | A'       |
| 2207.4167                     | 28.2867            | A'       |
| 3113.1178                     | 26.2082            | A'       |
| 3166.5137                     | 0.3702             | A'       |
| 3188.7021                     | 11.4620            | A'       |
| 3491.9872                     | 77.4926            | A'       |

**Table S.81** B3LYP/6-31G\* (unscaled) Computed Vibrational Frequencies and Intensities

**(s-E)-E-pent-2-en-4-ynethial (5)**

| Frequency (cm <sup>-1</sup> ) | Intensity (Km/mol) | Symmetry |
|-------------------------------|--------------------|----------|
| 119.9506                      | 0.0037             | A''      |
| 121.5038                      | 1.7361             | A'       |
| 221.0709                      | 3.1216             | A''      |
| 303.3371                      | 5.6185             | A'       |
| 389.0593                      | 0.4820             | A'       |
| 481.4243                      | 0.3356             | A''      |
| 562.7597                      | 3.8055             | A'       |
| 618.3334                      | 43.0838            | A''      |
| 630.4640                      | 48.7332            | A'       |
| 857.3707                      | 2.0734             | A''      |
| 923.1258                      | 4.5381             | A''      |
| 997.8385                      | 53.7718            | A'       |
| 1007.4915                     | 40.2870            | A''      |
| 1079.0621                     | 0.3563             | A'       |
| 1210.7960                     | 122.8575           | A'       |
| 1263.5040                     | 2.8110             | A'       |
| 1328.9197                     | 3.0635             | A'       |
| 1413.5206                     | 63.7720            | A'       |
| 1639.5495                     | 134.2853           | A'       |
| 2211.4309                     | 28.6808            | A'       |
| 3096.9096                     | 18.6736            | A'       |
| 3157.7164                     | 5.6104             | A'       |
| 3212.3500                     | 2.5273             | A'       |
| 3491.9089                     | 79.9740            | A'       |

**Table S.82** B3LYP/6-31G\* (unscaled) Computed Vibrational Frequencies and Intensities

**(s-Z)-Z-pent-2-en-4-ynethial (6)**

| Frequency (cm <sup>-1</sup> ) | Intensity (Km/mol) | Symmetry |
|-------------------------------|--------------------|----------|
| 89.8786                       | 2.1706             | A''      |
| 130.3166                      | 1.0425             | A'       |
| 232.6436                      | 0.2480             | A'       |
| 307.6903                      | 0.7308             | A''      |
| 453.6725                      | 7.3173             | A'       |
| 482.8862                      | 12.5251            | A''      |
| 613.7152                      | 49.8211            | A'       |
| 656.9285                      | 40.1386            | A''      |
| 762.9269                      | 4.0650             | A'       |
| 766.0970                      | 23.3718            | A''      |
| 875.6077                      | 6.6331             | A'       |
| 919.7187                      | 0.3341             | A''      |
| 971.7686                      | 22.2245            | A'       |
| 1002.4086                     | 0.0001             | A''      |
| 1168.8603                     | 36.5243            | A'       |
| 1293.9497                     | 24.6557            | A''      |
| 1414.3513                     | 38.8276            | A'       |
| 1465.1306                     | 10.7272            | A'       |
| 1634.4097                     | 97.9164            | A'       |
| 2201.7281                     | 32.0999            | A'       |
| 3099.9723                     | 32.7816            | A'       |
| 3154.3279                     | 0.2032             | A'       |
| 3178.4863                     | 23.2403            | A'       |
| 3493.0391                     | 55.6347            | A'       |

**Table S.83** B3LYP/6-31G\* (unscaled) Computed Vibrational Frequencies and Intensities

**(*s-E*)-*Z*-pent-2-en-4-ynethial (6)**

| Frequency (cm <sup>-1</sup> ) | Intensity (Km/mol) | Symmetry |
|-------------------------------|--------------------|----------|
| 119.0970                      | 0.6960             | A'       |
| 131.5279                      | 0.9965             | A''      |
| 271.2126                      | 0.7273             | A''      |
| 295.5563                      | 8.3691             | A'       |
| 383.3593                      | 0.8871             | A'       |
| 498.7992                      | 8.4511             | A''      |
| 621.3576                      | 46.7021            | A''      |
| 634.8250                      | 42.3143            | A'       |
| 683.2353                      | 4.4973             | A'       |
| 822.0271                      | 23.9330            | A''      |
| 916.4752                      | 8.1759             | A''      |
| 927.3896                      | 7.2893             | A'       |
| 1009.5280                     | 0.9909             | A''      |
| 1052.7528                     | 50.1993            | A'       |
| 1177.1601                     | 52.6203            | A'       |
| 1254.1288                     | 36.6719            | A'       |
| 1348.8011                     | 10.1599            | A'       |
| 1462.7122                     | 24.4400            | A'       |
| 1620.6126                     | 97.5833            | A'       |
| 2209.1829                     | 17.9576            | A'       |
| 3128.1780                     | 4.6967             | A'       |
| 3170.9944                     | 3.1582             | A'       |
| 3210.1232                     | 4.0062             | A'       |
| 3491.2258                     | 78.6710            | A'       |

**Table S.84** B3LYP/6-31G\* (unscaled) Computed Vibrational Frequencies and Intensities

**4-thiacyclohexa-1,2,5-triene (7)**

| Frequency (cm <sup>-1</sup> ) | Intensity (Km/mol) | Symmetry |
|-------------------------------|--------------------|----------|
| 247.4932                      | 23.1487            | A        |
| 401.6391                      | 13.0244            | A        |
| 460.8204                      | 7.0565             | A        |
| 484.7846                      | 33.9136            | A        |
| 527.4042                      | 8.2922             | A        |
| 678.6087                      | 12.1999            | A        |
| 701.1234                      | 12.6085            | A        |
| 719.2167                      | 69.6481            | A        |
| 779.8097                      | 41.5891            | A        |
| 816.0627                      | 32.1764            | A        |
| 864.5795                      | 4.9097             | A        |
| 926.2950                      | 3.5085             | A        |
| 1039.5061                     | 1.9353             | A        |
| 1147.1519                     | 9.9364             | A        |
| 1186.4460                     | 2.3453             | A        |
| 1281.1095                     | 9.2474             | A        |
| 1371.3954                     | 1.2743             | A        |
| 1407.9035                     | 43.0420            | A        |
| 1539.4797                     | 12.5549            | A        |
| 1767.0630                     | 6.1463             | A        |
| 3160.8330                     | 20.6219            | A        |
| 3181.8226                     | 14.3791            | A        |
| 3198.0943                     | 12.7714            | A        |
| 3216.0695                     | 3.6599             | A        |



**Table S.85** B3LYP/6-31G\* (unscaled) Computed Vibrational Frequencies and Intensities

**propargyl thioketene (8)**

| Frequency (cm <sup>-1</sup> ) | Intensity (Km/mol) | Symmetry |
|-------------------------------|--------------------|----------|
| 46.4027                       | 0.2898             | A        |
| 152.1138                      | 0.1636             | A        |
| 197.9184                      | 0.6962             | A        |
| 332.1916                      | 2.2120             | A        |
| 403.5622                      | 3.7307             | A        |
| 463.1063                      | 1.9995             | A        |
| 550.3167                      | 10.8165            | A        |
| 604.6812                      | 48.6021            | A        |
| 626.1152                      | 44.8356            | A        |
| 651.5315                      | 27.7815            | A        |
| 823.9461                      | 18.2129            | A        |
| 947.1696                      | 19.5565            | A        |
| 965.8906                      | 6.5005             | A        |
| 1059.6143                     | 1.4786             | A        |
| 1207.4163                     | 0.4836             | A        |
| 1290.9242                     | 55.6585            | A        |
| 1357.2021                     | 18.2251            | A        |
| 1493.8699                     | 5.1053             | A        |
| 1853.9544                     | 398.9808           | A        |
| 2241.7639                     | 0.1758             | A        |
| 3027.9453                     | 18.1239            | A        |
| 3084.0111                     | 5.8203             | A        |
| 3179.8179                     | 7.6738             | A        |
| 3494.6626                     | 60.3348            | A        |

**Table S.86** B3LYP/6-31G\* (unscaled) Computed Vibrational Frequencies and Intensities

**(*s-Z*)- $\alpha$ -thial methylenecyclopropene (9)**

| Frequency (cm <sup>-1</sup> ) | Intensity (Km/mol) | Symmetry |
|-------------------------------|--------------------|----------|
| 129.5721                      | 3.7294             | A'       |
| 148.0544                      | 1.0367             | A''      |
| 247.4935                      | 9.8051             | A''      |
| 334.7602                      | 0.3736             | A'       |
| 508.8217                      | 5.3639             | A''      |
| 639.6986                      | 29.7384            | A'       |
| 757.1140                      | 17.6312            | A''      |
| 797.4082                      | 62.0034            | A'       |
| 806.0586                      | 2.4993             | A''      |
| 907.5507                      | 20.4238            | A'       |
| 928.7995                      | 0.0206             | A''      |
| 933.5975                      | 1.4645             | A''      |
| 973.3675                      | 4.0430             | A'       |
| 1035.0499                     | 30.7528            | A'       |
| 1131.4944                     | 6.8191             | A'       |
| 1212.4920                     | 136.8468           | A'       |
| 1413.2696                     | 45.0903            | A'       |
| 1421.8994                     | 137.2799           | A'       |
| 1550.5023                     | 229.0089           | A'       |
| 1799.3744                     | 406.9012           | A'       |
| 3099.0361                     | 38.4754            | A'       |
| 3188.0784                     | 15.5984            | A'       |
| 3279.5207                     | 4.7207             | A'       |
| 3332.0464                     | 8.9792             | A'       |

**Table S.87** B3LYP/6-31G\* (unscaled) Computed Vibrational Frequencies and Intensities

**(*s-E*)- $\alpha$ -thial methylenecyclopropene (9)**

| Frequency (cm <sup>-1</sup> ) | Intensity (Km/mol) | Symmetry |
|-------------------------------|--------------------|----------|
| 118.1890                      | 0.0700             | A''      |
| 142.1994                      | 0.0871             | A'       |
| 283.1040                      | 2.1594             | A''      |
| 350.3533                      | 6.4049             | A'       |
| 463.6324                      | 9.6171             | A''      |
| 469.4910                      | 6.9309             | A'       |
| 732.1181                      | 41.4395            | A''      |
| 859.5871                      | 13.5639            | A''      |
| 865.2882                      | 18.9020            | A'       |
| 920.1508                      | 10.0260            | A''      |
| 929.0043                      | 13.3951            | A''      |
| 935.1766                      | 16.4156            | A'       |
| 1023.7360                     | 72.2054            | A'       |
| 1040.0664                     | 20.7261            | A'       |
| 1124.7751                     | 20.3880            | A'       |
| 1230.5468                     | 191.6680           | A'       |
| 1296.5497                     | 7.1558             | A'       |
| 1467.5649                     | 69.4352            | A'       |
| 1573.0652                     | 348.2824           | A'       |
| 1800.2869                     | 557.2771           | A'       |
| 3077.8390                     | 24.3687            | A'       |
| 3206.2680                     | 3.3427             | A'       |
| 3278.3670                     | 4.4177             | A'       |
| 3316.8080                     | 10.4195            | A'       |

**Table S.88** B3LYP/6-31G\* (unscaled) Computed Vibrational Frequencies and Intensities**4-thiacyclohexa-2,5-dienylidene (triplet) (10)**

| <b>Frequency (cm<sup>-1</sup>)</b> | <b>Intensity (Km/mol)</b> | <b>Symmetry</b> |
|------------------------------------|---------------------------|-----------------|
| 144.1251                           | 7.5001                    | B1              |
| 359.2745                           | 0.0000                    | A2              |
| 440.8691                           | 2.6367                    | A1              |
| 515.8622                           | 39.5622                   | B1              |
| 538.3881                           | 0.4052                    | B2              |
| 663.6756                           | 0.0000                    | A2              |
| 682.4337                           | 9.1395                    | A1              |
| 689.1932                           | 49.8622                   | B1              |
| 737.9576                           | 0.0015                    | B2              |
| 900.0327                           | 1.6531                    | B1              |
| 902.0157                           | 0.7272                    | A1              |
| 912.3045                           | 0.0000                    | A2              |
| 976.7184                           | 11.2770                   | A1              |
| 1148.1954                          | 7.8178                    | B2              |
| 1192.6933                          | 0.1673                    | A1              |
| 1257.3035                          | 43.1047                   | B2              |
| 1353.5471                          | 2.0660                    | B2              |
| 1403.6466                          | 0.4580                    | A1              |
| 1429.0412                          | 0.0513                    | B2              |
| 1537.2398                          | 0.0168                    | A1              |
| 3169.0973                          | 9.8611                    | B2              |
| 3170.5543                          | 2.2931                    | A1              |
| 3222.9428                          | 0.6162                    | A1              |
| 3223.0129                          | 4.4386                    | B2              |

**Table S.89** B3LYP/6-31G\* (unscaled) Computed Vibrational Frequencies and Intensities**4-thiacyclohexa-2,5-dienylidene (singlet) (10)**

| <b>Frequency (cm<sup>-1</sup>)</b> | <b>Intensity (Km/mol)</b> | <b>Symmetry</b> |
|------------------------------------|---------------------------|-----------------|
| 132.7398                           | 23.0410                   | B1              |
| 198.6640                           | 0.0000                    | A2              |
| 461.7588                           | 4.7197                    | A1              |
| 520.8193                           | 4.2635                    | B1              |
| 567.7926                           | 0.3136                    | B2              |
| 736.9938                           | 23.5377                   | A1              |
| 745.2104                           | 29.7440                   | B1              |
| 795.7296                           | 0.0000                    | A2              |
| 810.4740                           | 2.4001                    | B2              |
| 898.4520                           | 1.3163                    | A1              |
| 981.4225                           | 0.3104                    | A1              |
| 985.4722                           | 0.0000                    | A2              |
| 994.2722                           | 0.9534                    | B1              |
| 1143.0010                          | 0.2523                    | B2              |
| 1228.1877                          | 10.0049                   | A1              |
| 1335.8336                          | 0.1375                    | B2              |
| 1403.5048                          | 1.3821                    | B2              |
| 1429.9689                          | 7.3029                    | A1              |
| 1459.0924                          | 2.5861                    | B2              |
| 1510.6393                          | 42.5923                   | A1              |
| 3100.8511                          | 66.6766                   | B2              |
| 3103.1646                          | 6.7913                    | A1              |
| 3182.1225                          | 1.0344                    | A1              |
| 3185.3162                          | 16.9256                   | B2              |

**Table S.90** B3LYP/6-31G\* (unscaled) Computed Vibrational Frequencies and Intensities**(s-Z)-2-thienyl carbene (triplet) (11)**

| Frequency (cm <sup>-1</sup> ) | Intensity (Km/mol) | Symmetry |
|-------------------------------|--------------------|----------|
| 316.5488                      | 1.5614             | A''      |
| 316.5488                      | 4.0862             | A'       |
| 445.3312                      | 27.1973            | A''      |
| 469.9115                      | 21.2356            | A''      |
| 541.3309                      | 0.0942             | A'       |
| 567.0699                      | 0.2381             | A''      |
| 616.3511                      | 1.7204             | A'       |
| 665.2321                      | 47.7807            | A''      |
| 737.8128                      | 4.9278             | A'       |
| 770.0327                      | 12.3142            | A''      |
| 825.2680                      | 19.6047            | A'       |
| 856.8486                      | 24.2974            | A'       |
| 906.1707                      | 0.3353             | A''      |
| 1076.2463                     | 4.7195             | A'       |
| 1106.2570                     | 3.9419             | A'       |
| 1167.1874                     | 14.4231            | A'       |
| 1305.6986                     | 3.5426             | A'       |
| 1388.6117                     | 2.4407             | A'       |
| 1429.8178                     | 1.2706             | A'       |
| 1502.7392                     | 5.8233             | A'       |
| 3220.5441                     | 5.7219             | A'       |
| 3241.5605                     | 3.8123             | A'       |
| 3266.0516                     | 1.3643             | A'       |
| 3293.6811                     | 1.4745             | A'       |

**Table S.91** B3LYP/6-31G\* (unscaled) Computed Vibrational Frequencies and Intensities

**(s-Z)-2-thienyl carbene (singlet) (11)**

| Frequency (cm <sup>-1</sup> ) | Intensity (Km/mol) | Symmetry |
|-------------------------------|--------------------|----------|
| 207.3744                      | 0.2558             | A''      |
| 311.4328                      | 11.4749            | A'       |
| 377.4984                      | 13.2334            | A''      |
| 519.2452                      | 14.9018            | A'       |
| 550.8419                      | 0.4830             | A''      |
| 563.7090                      | 1.3012             | A'       |
| 678.4411                      | 678.4411           | A''      |
| 764.1951                      | 764.1951           | A'       |
| 792.1635                      | 792.1635           | A''      |
| 882.0084                      | 882.0084           | A'       |
| 906.9368                      | 906.9368           | A''      |
| 962.7151                      | 962.7151           | A''      |
| 1036.1229                     | 1036.1229          | A'       |
| 1069.0584                     | 1069.0584          | A'       |
| 1111.4208                     | 1111.4208          | A'       |
| 1162.7304                     | 36.5675            | A'       |
| 1313.5615                     | 16.4147            | A'       |
| 1398.3658                     | 88.5173            | A'       |
| 1472.0547                     | 61.7295            | A'       |
| 1548.2557                     | 44.7907            | A'       |
| 3000.6408                     | 96.5967            | A'       |
| 3228.1613                     | 0.6329             | A'       |
| 3241.7119                     | 1.9977             | A'       |
| 3251.6763                     | 2.1462             | A'       |

**Table S.92** CCSD/cc-pVTZ (unscaled) Computed Vibrational Frequencies and Intensities

**(s-Z)-2-thienyl carbene (triplet) (11)**

| Frequency (cm <sup>-1</sup> ) | Intensity (Km/mol) | Symmetry |
|-------------------------------|--------------------|----------|
| 221.3541                      | 2.0971             | A''      |
| 317.4751                      | 2.472              | A'       |
| 472.6379                      | 1.3954             | A''      |
| 481.449                       | 40.0569            | A''      |
| 547.8369                      | 0.017              | A'       |
| 572.7244                      | 1.6391             | A''      |
| 671.7829                      | 1.8324             | A'       |
| 696.0119                      | 60.0742            | A''      |
| 751.5079                      | 3.3614             | A'       |
| 800.7288                      | 11.6682            | A''      |
| 850.3227                      | 11.2152            | A'       |
| 873.7626                      | 22.0313            | A'       |
| 926.6199                      | 0.7524             | A''      |
| 1069.5794                     | 2.1261             | A'       |
| 1106.8333                     | 3.112              | A'       |
| 1202.0997                     | 14.4147            | A'       |
| 1307.508                      | 5.0891             | A'       |
| 1336.8968                     | 2.0957             | A'       |
| 1424.8357                     | 2.713              | A'       |
| 1517.114                      | 3.0655             | A'       |
| 3239.5566                     | 3.035              | A'       |
| 3258.1141                     | 1.5051             | A'       |
| 3279.6246                     | 1.416              | A'       |
| 3285.6548                     | 1.5976             | A'       |



**Table S.93** CCSD/cc-pVTZ (unscaled) Computed Vibrational Frequencies and Intensities

**(s-Z)-2-thienyl carbene (singlet) (11)**

| Frequency (cm <sup>-1</sup> ) | Intensity (Km/mol) | Symmetry |
|-------------------------------|--------------------|----------|
| 212.3067                      | 0.1371             | A''      |
| 323.8503                      | 7.2728             | A'       |
| 414.4724                      | 15.5979            | A''      |
| 563.9221                      | 0.2107             | A''      |
| 574.4751                      | 3.0932             | A'       |
| 666.4761                      | 10.0451            | A'       |
| 673.8652                      | 12.8811            | A''      |
| 770.8974                      | 5.5254             | A'       |
| 796.2943                      | 87.1228            | A''      |
| 889.6467                      | 31.4826            | A'       |
| 923.6027                      | 0.4922             | A''      |
| 978.8093                      | 1.1324             | A''      |
| 1061.4314                     | 43.6353            | A'       |
| 1095.7343                     | 2.8837             | A'       |
| 1113.3491                     | 8.9153             | A'       |
| 1226.0312                     | 1.8816             | A'       |
| 1310.8983                     | 36.3312            | A'       |
| 1385.7939                     | 208.3565           | A'       |
| 1463.4538                     | 58.3526            | A'       |
| 1559.3321                     | 66.0987            | A'       |
| 2991.0898                     | 73.6756            | A'       |
| 3244.9759                     | 0.5159             | A'       |
| 3257.6918                     | 0.1462             | A'       |
| 3268.7358                     | 0.9064             | A'       |

**Table S.94** B3LYP/6-31G\* (unscaled) Computed Vibrational Frequencies and Intensities

**(*s-E*)-2-thienyl carbene (triplet) (11)**

| Frequency (cm <sup>-1</sup> ) | Intensity (Km/mol) | Symmetry |
|-------------------------------|--------------------|----------|
| 221.0622                      | 0.8541             | A''      |
| 318.1642                      | 2.3337             | A'       |
| 422.4918                      | 26.1967            | A''      |
| 496.2700                      | 1.4929             | A''      |
| 551.2696                      | 0.3875             | A'       |
| 565.7129                      | 0.0059             | A''      |
| 606.2826                      | 7.4542             | A'       |
| 666.1551                      | 60.9509            | A''      |
| 735.2658                      | 3.3006             | A'       |
| 759.7439                      | 17.4776            | A''      |
| 848.7283                      | 15.6982            | A'       |
| 860.6903                      | 20.6393            | A'       |
| 902.4638                      | 0.3101             | A''      |
| 1080.6544                     | 3.3910             | A'       |
| 1107.2466                     | 3.1960             | A'       |
| 1169.5270                     | 2.7287             | A'       |
| 1304.7931                     | 3.3091             | A'       |
| 1379.7566                     | 4.3825             | A'       |
| 1425.8801                     | 1.3981             | A'       |
| 1496.2238                     | 6.0276             | A'       |
| 3217.9159                     | 5.5371             | A'       |
| 3237.9314                     | 5.8051             | A'       |
| 3268.8858                     | 1.2862             | A'       |
| 3280.9970                     | 1.7172             | A'       |

**Table S.95** B3LYP/6-31G\* (unscaled) Computed Vibrational Frequencies and Intensities

**(*s-E*)-2-thienyl carbene (singlet) (11)**

| Frequency (cm <sup>-1</sup> ) | Intensity (Km/mol) | Symmetry |
|-------------------------------|--------------------|----------|
| 212.2615                      | 4.4798             | A''      |
| 322.9003                      | 6.8612             | A'       |
| 382.2628                      | 22.2833            | A''      |
| 557.8655                      | 24.7571            | A''      |
| 573.4436                      | 2.1794             | A'       |
| 619.1107                      | 7.7638             | A'       |
| 656.4700                      | 24.7508            | A'       |
| 755.8438                      | 3.6963             | A'       |
| 775.8639                      | 34.9585            | A''      |
| 888.4902                      | 22.8314            | A'       |
| 897.2212                      | 1.7960             | A''      |
| 952.2453                      | 0.3299             | A''      |
| 1019.8118                     | 18.8553            | A'       |
| 1099.6760                     | 22.7661            | A'       |
| 1115.5050                     | 14.8857            | A'       |
| 1226.4940                     | 7.8393             | A'       |
| 1309.7834                     | 22.5603            | A'       |
| 1368.0635                     | 94.7470            | A'       |
| 1470.2844                     | 50.2940            | A'       |
| 1530.1176                     | 24.8875            | A'       |
| 2950.9513                     | 124.1566           | A'       |
| 3219.6077                     | 1.9728             | A'       |
| 3234.3427                     | 4.2945             | A'       |
| 3252.3611                     | 1.4719             | A'       |

**Table S.96** CCSD/cc-pVTZ (unscaled) Computed Vibrational Frequencies and Intensities

**(*s-E*)-2-thienyl carbene (triplet) (11)**

| Frequency (cm <sup>-1</sup> ) | Intensity (Km/mol) | Symmetry |
|-------------------------------|--------------------|----------|
| 227.8632                      | 1.2252             | A''      |
| 318.4351                      | 2.6373             | A'       |
| 443.3949                      | 25.4583            | A''      |
| 506.8472                      | 1.8271             | A''      |
| 555.0675                      | 0.227              | A'       |
| 570.0468                      | 0.569              | A''      |
| 652.4392                      | 5.548              | A'       |
| 697.2255                      | 70.7629            | A''      |
| 750.4378                      | 2.3227             | A'       |
| 791.2244                      | 15.1957            | A''      |
| 865.2881                      | 13.4012            | A'       |
| 889.8573                      | 14.7389            | A'       |
| 922.4388                      | 0.7718             | A''      |
| 1072.4772                     | 2.6001             | A'       |
| 1107.8788                     | 3.118              | A'       |
| 1197.437                      | 3.579              | A'       |
| 1308.6599                     | 4.1452             | A'       |
| 1333.2854                     | 6.0493             | A'       |
| 1422.4506                     | 2.5026             | A'       |
| 1512.8406                     | 3.5513             | A'       |
| 3237.4528                     | 3.2021             | A'       |
| 3254.4694                     | 2.662              | A'       |
| 3277.2482                     | 1.88               | A'       |
| 3281.0038                     | 1.3188             | A'       |

**Table S.97** CCSD/cc-pVTZ (unscaled) Computed Vibrational Frequencies and Intensities

**(*s-E*)-2-thienyl carbene (singlet) (11)**

| Frequency (cm <sup>-1</sup> ) | Intensity (Km/mol) | Symmetry |
|-------------------------------|--------------------|----------|
| 214.1141                      | 3.6496             | A''      |
| 324.2148                      | 6.8595             | A'       |
| 421.9359                      | 17.1741            | A''      |
| 560.9453                      | 31.0831            | A''      |
| 578.5733                      | 1.7944             | A'       |
| 665.6466                      | 28.949             | A''      |
| 691.2529                      | 4.9288             | A'       |
| 766.9046                      | 6.3076             | A'       |
| 790.3233                      | 45.2846            | A''      |
| 897.5405                      | 37.0796            | A'       |
| 916.7778                      | 4.0901             | A''      |
| 966.5625                      | 0.4894             | A''      |
| 1058.2013                     | 5.297              | A'       |
| 1101.2101                     | 43.2672            | A'       |
| 1113.7807                     | 23.1358            | A'       |
| 1262.2311                     | 23.4255            | A'       |
| 1313.0967                     | 38.1073            | A'       |
| 1364.4314                     | 220.9169           | A'       |
| 1466.8165                     | 53.0407            | A'       |
| 1549.582                      | 52.7949            | A'       |
| 2976.2711                     | 89.8395            | A'       |
| 3236.7837                     | 0.7131             | A'       |
| 3251.8515                     | 1.3835             | A'       |
| 3267.7154                     | 0.7645             | A'       |

**Table S.98** B3LYP/6-31G\* (unscaled) Computed Vibrational Frequencies and Intensities

**2-thiabicyclo[3.1.0]hexa-3,5-diene (12)**

| Frequency (cm <sup>-1</sup> ) | Intensity (Km/mol) | Symmetry |
|-------------------------------|--------------------|----------|
| 288.4450                      | 5.1232             | A        |
| 328.0444                      | 2.4098             | A        |
| 489.5940                      | 7.3413             | A        |
| 528.5782                      | 11.1556            | A        |
| 620.8399                      | 0.0842             | A        |
| 661.7199                      | 37.4769            | A        |
| 677.6008                      | 23.1284            | A        |
| 689.6169                      | 73.2052            | A        |
| 794.9829                      | 17.8243            | A        |
| 813.5686                      | 5.3080             | A        |
| 888.4722                      | 7.0667             | A        |
| 985.6982                      | 13.9957            | A        |
| 998.7725                      | 4.7365             | A        |
| 1047.0441                     | 11.1798            | A        |
| 1112.7496                     | 1.0918             | A        |
| 1141.2439                     | 12.8832            | A        |
| 1272.8739                     | 9.5953             | A        |
| 1331.9973                     | 1.2254             | A        |
| 1524.7865                     | 21.1318            | A        |
| 1776.3356                     | 28.9732            | A        |
| 3133.2911                     | 32.5063            | A        |
| 3227.0272                     | 0.5068             | A        |
| 3251.2479                     | 4.0529             | A        |
| 3275.1449                     | 0.3753             | A        |

**Table S.99** B3LYP/6-31G\* (unscaled) Computed Vibrational Frequencies and Intensities

**(s-Z)-3-thienyl carbene (triplet) (13)**

| Frequency (cm <sup>-1</sup> ) | Intensity (Km/mol) | Symmetry |
|-------------------------------|--------------------|----------|
| 230.2856                      | 2.8102             | A''      |
| 332.9358                      | 5.2268             | A'       |
| 424.8469                      | 3.7521             | A''      |
| 464.7577                      | 22.9057            | A'       |
| 558.3848                      | 0.2322             | A'       |
| 618.3891                      | 15.0062            | A''      |
| 637.2126                      | 3.2917             | A''      |
| 664.0452                      | 1.8485             | A'       |
| 755.3259                      | 69.7490            | A''      |
| 810.0020                      | 8.5495             | A'       |
| 841.9969                      | 8.6248             | A'       |
| 886.2660                      | 18.2022            | A'       |
| 899.2907                      | 0.1709             | A''      |
| 975.4522                      | 15.0728            | A'       |
| 1112.8602                     | 4.4187             | A'       |
| 1221.9962                     | 5.9258             | A'       |
| 1289.3100                     | 2.8476             | A'       |
| 1348.1937                     | 2.4775             | A'       |
| 1419.6152                     | 0.0459             | A'       |
| 1551.8065                     | 5.9277             | A'       |
| 3233.3796                     | 2.3103             | A'       |
| 3264.4344                     | 1.8267             | A'       |
| 3270.0802                     | 1.1249             | A'       |
| 3273.2543                     | 1.7141             | A'       |

**Table S.100** B3LYP/6-31G\* (unscaled) Computed Vibrational Frequencies and Intensities

**(s-Z)-3-thienyl carbene (singlet) (13)**

| Frequency (cm <sup>-1</sup> ) | Intensity (Km/mol) | Symmetry |
|-------------------------------|--------------------|----------|
| 144.0879                      | 19.4556            | A''      |
| 362.9422                      | 10.1430            | A'       |
| 388.0851                      | 14.4198            | A''      |
| 559.9900                      | 2.4644             | A'       |
| 584.6080                      | 20.5627            | A''      |
| 632.2876                      | 28.5065            | A''      |
| 662.4395                      | 0.2993             | A'       |
| 722.2213                      | 5.1535             | A''      |
| 806.7412                      | 1.9645             | A'       |
| 823.0643                      | 61.0665            | A''      |
| 888.3153                      | 42.3332            | A'       |
| 933.6567                      | 0.8227             | A''      |
| 961.5001                      | 1.1772             | A'       |
| 1104.9649                     | 14.9100            | A'       |
| 1116.4781                     | 21.2112            | A'       |
| 1219.9507                     | 13.1133            | A'       |
| 1272.5976                     | 63.9307            | A'       |
| 1402.8998                     | 27.4016            | A'       |
| 1437.5696                     | 106.9324           | A'       |
| 1546.2689                     | 13.6591            | A'       |
| 2922.0172                     | 138.4670           | A'       |
| 3243.5535                     | 0.6321             | A'       |
| 3263.9619                     | 1.3179             | A'       |
| 3275.7428                     | 0.8887             | A'       |



**Table S.101** CCSD/cc-pVTZ (unscaled) Computed Vibrational Frequencies and Intensities

**(s-Z)-3-thienyl carbene (triplet) (13)**

| Frequency (cm <sup>-1</sup> ) | Intensity (Km/mol) | Symmetry |
|-------------------------------|--------------------|----------|
| 235.3709                      | 3.0888             | A''      |
| 334.5247                      | 4.9067             | A'       |
| 434.3221                      | 6.4414             | A''      |
| 476.7988                      | 18.0179            | A''      |
| 565.2696                      | 0.1529             | A'       |
| 626.2352                      | 15.1979            | A''      |
| 673.1558                      | 1.1725             | A'       |
| 684.8437                      | 3.366              | A''      |
| 780.2331                      | 70.7374            | A''      |
| 833.0116                      | 10.4657            | A'       |
| 858.8637                      | 8.1745             | A'       |
| 902.4998                      | 10.5506            | A'       |
| 933.5874                      | 0.0555             | A''      |
| 987.1748                      | 12.2723            | A'       |
| 1110.9139                     | 3.6535             | A'       |
| 1222.1019                     | 3.4673             | A'       |
| 1286.3188                     | 3.693              | A'       |
| 1380.5828                     | 4.8959             | A'       |
| 1423.0909                     | 0.4454             | A'       |
| 1571.4291                     | 6.8802             | A'       |
| 3248.1656                     | 0.9645             | A'       |
| 3265.1588                     | 0.3891             | A'       |
| 3277.5372                     | 0.6528             | A'       |
| 3280.6259                     | 1.3911             | A'       |

**Table S.102** CCSD/cc-pVTZ (unscaled) Computed Vibrational Frequencies and Intensities

**(s-Z)-3-thienyl carbene (singlet) (13)**

| Frequency (cm <sup>-1</sup> ) | Intensity (Km/mol) | Symmetry |
|-------------------------------|--------------------|----------|
| 173.2718                      | 15.4985            | A''      |
| 363.0906                      | 13.5752            | A'       |
| 405.5744                      | 19.1486            | A''      |
| 565.2993                      | 4.3719             | A'       |
| 588.2931                      | 25.2927            | A''      |
| 631.9141                      | 34.5473            | A''      |
| 674.9791                      | 2.5239             | A'       |
| 746.4618                      | 9.6746             | A''      |
| 831.9761                      | 4.1341             | A'       |
| 849.6883                      | 57.5203            | A''      |
| 908.7085                      | 42.6943            | A'       |
| 950.9422                      | 0.8466             | A''      |
| 972.169                       | 0.3961             | A'       |
| 1107.7167                     | 13.6072            | A'       |
| 1124.5858                     | 24.136             | A'       |
| 1233.1251                     | 21.5553            | A'       |
| 1280.8466                     | 94.4411            | A'       |
| 1439.4544                     | 21.2349            | A'       |
| 1456.5178                     | 186.1406           | A'       |
| 1557.2204                     | 46.3792            | A'       |
| 2957.6457                     | 95.1939            | A'       |
| 3255.5259                     | 1.2804             | A'       |
| 3270.4853                     | 2.1538             | A'       |
| 3284.8737                     | 0.3869             | A'       |

**Table S.103** B3LYP/6-31G\* (unscaled) Computed Vibrational Frequencies and Intensities

**(*s-E*)-3-thienyl carbene (triplet) (13)**

| Frequency (cm <sup>-1</sup> ) | Intensity (Km/mol) | Symmetry |
|-------------------------------|--------------------|----------|
| 229.8101                      | 0.8370             | A''      |
| 331.9465                      | 0.7930             | A'       |
| 410.8722                      | 25.0543            | A''      |
| 437.3061                      | 3.2842             | A''      |
| 556.2456                      | 0.6577             | A'       |
| 615.6011                      | 10.2787            | A''      |
| 642.7157                      | 0.4713             | A''      |
| 661.7021                      | 0.9120             | A'       |
| 751.0335                      | 78.1174            | A''      |
| 822.3692                      | 8.9274             | A'       |
| 843.3596                      | 36.9560            | A'       |
| 890.4561                      | 3.6215             | A'       |
| 891.6614                      | 0.1986             | A''      |
| 956.9979                      | 4.5144             | A'       |
| 1114.5889                     | 4.1435             | A'       |
| 1220.0644                     | 3.6349             | A'       |
| 1284.6886                     | 3.0712             | A'       |
| 1353.8378                     | 5.6938             | A'       |
| 1423.4396                     | 0.2916             | A'       |
| 1548.4560                     | 5.6303             | A'       |
| 3228.0574                     | 3.4317             | A'       |
| 3264.8925                     | 2.6215             | A'       |
| 3268.0110                     | 1.4553             | A'       |
| 3276.7229                     | 1.3771             | A'       |

**Table S.104** B3LYP/6-31G\* (unscaled) Computed Vibrational Frequencies and Intensities

**(*s-E*)-3-thienyl carbene (singlet) (13)**

| Frequency (cm <sup>-1</sup> ) | Intensity (Km/mol) | Symmetry |
|-------------------------------|--------------------|----------|
| 182.9407                      | 0.0395             | A''      |
| 354.6757                      | 9.9085             | A'       |
| 391.4328                      | 22.5641            | A''      |
| 565.9100                      | 2.0179             | A'       |
| 577.4740                      | 27.8792            | A''      |
| 636.3785                      | 0.7619             | A''      |
| 654.4438                      | 2.1454             | A'       |
| 722.5307                      | 22.0043            | A''      |
| 803.0433                      | 1.6801             | A'       |
| 849.5372                      | 56.6115            | A''      |
| 892.7329                      | 48.6351            | A'       |
| 920.3262                      | 0.8105             | A''      |
| 959.3598                      | 6.7322             | A'       |
| 1098.2640                     | 1.7404             | A'       |
| 1114.7693                     | 8.1600             | A'       |
| 1209.7266                     | 15.5958            | A'       |
| 1271.4795                     | 43.4238            | A'       |
| 1396.8120                     | 1.2913             | A'       |
| 1446.8240                     | 134.4207           | A'       |
| 1548.9581                     | 19.1897            | A'       |
| 2921.1716                     | 144.1146           | A'       |
| 3227.2383                     | 1.3762             | A'       |
| 3268.7398                     | 1.1843             | A'       |
| 3279.8893                     | 4.8018             | A'       |

**Table S.105** CCSD/cc-pVTZ (unscaled) Computed Vibrational Frequencies and Intensities

**(*s-E*)-3-thienyl carbene (triplet) (13)**

| Frequency (cm <sup>-1</sup> ) | Intensity (Km/mol) | Symmetry |
|-------------------------------|--------------------|----------|
| 234.5973                      | 1.6152             | A''      |
| 334.131                       | 0.7034             | A'       |
| 426.1609                      | 25.2401            | A''      |
| 447.826                       | 0.6607             | A''      |
| 562.8277                      | 0.4627             | A'       |
| 622.4599                      | 13.7079            | A''      |
| 671.0272                      | 0.6627             | A'       |
| 689.4085                      | 0.0922             | A''      |
| 777.1296                      | 77.537             | A''      |
| 842.5105                      | 15.069             | A'       |
| 862.8557                      | 23.0059            | A'       |
| 908.0348                      | 2.0181             | A'       |
| 927.2128                      | 0.0443             | A''      |
| 968.0389                      | 4.726              | A'       |
| 1112.0735                     | 3.7861             | A'       |
| 1221.4077                     | 2.3989             | A'       |
| 1281.4432                     | 3.5418             | A'       |
| 1386.3272                     | 6.1221             | A'       |
| 1426.6971                     | 0.9257             | A'       |
| 1568.4304                     | 6.9173             | A'       |
| 3243.717                      | 1.5683             | A'       |
| 3267.296                      | 1.499              | A'       |
| 3278.7094                     | 0.3721             | A'       |
| 3282.0464                     | 1.744              | A'       |

**Table S.106** CCSD/cc-pVTZ (unscaled) Computed Vibrational Frequencies and Intensities

**(*s-E*)-3-thienyl carbene (singlet) (13)**

| Frequency (cm <sup>-1</sup> ) | Intensity (Km/mol) | Symmetry |
|-------------------------------|--------------------|----------|
| 192.1676                      | 0.0296             | A''      |
| 355.9647                      | 8.4185             | A'       |
| 408.6436                      | 19.7686            | A''      |
| 568.9531                      | 4.9646             | A'       |
| 577.7256                      | 30.968             | A''      |
| 638.1522                      | 1.0058             | A''      |
| 668.1496                      | 5.6529             | A'       |
| 744.6824                      | 26.9329            | A''      |
| 830.2523                      | 2.0544             | A'       |
| 874.5624                      | 54.2404            | A''      |
| 909.2113                      | 53.3167            | A'       |
| 939.3064                      | 0.5914             | A''      |
| 972.4137                      | 5.0539             | A'       |
| 1110.8894                     | 1.2063             | A'       |
| 1113.372                      | 12.495             | A'       |
| 1223.658                      | 24.9687            | A'       |
| 1283.7225                     | 79.7315            | A'       |
| 1431.2672                     | 2.7276             | A'       |
| 1465.7064                     | 195.5607           | A'       |
| 1558.1581                     | 54.9221            | A'       |
| 2956.5676                     | 103.1564           | A'       |
| 3242.5994                     | 0.7693             | A'       |
| 3280.1471                     | 0.6654             | A'       |
| 3283.2391                     | 6.1921             | A'       |

**Table S.107** B3LYP/6-31G\* (unscaled) Computed Vibrational Frequencies and Intensities

**2-ethynylcyclopropanethione (14)**

| <b>Frequency (cm<sup>-1</sup>)</b> | <b>Intensity (Km/mol)</b> | <b>Symmetry</b> |
|------------------------------------|---------------------------|-----------------|
| 97.7477                            | 0.3097                    | A               |
| 197.1614                           | 1.0186                    | A               |
| 305.5630                           | 2.1012                    | A               |
| 336.4695                           | 1.1782                    | A               |
| 486.0304                           | 3.8697                    | A               |
| 521.0215                           | 0.5027                    | A               |
| 581.6420                           | 39.8244                   | A               |
| 640.4928                           | 17.7266                   | A               |
| 643.7578                           | 44.5728                   | A               |
| 777.3970                           | 2.4094                    | A               |
| 845.8627                           | 7.8936                    | A               |
| 945.8408                           | 35.8659                   | A               |
| 1020.8839                          | 9.5491                    | A               |
| 1050.1037                          | 2.7201                    | A               |
| 1089.4792                          | 2.2814                    | A               |
| 1110.7083                          | 2.3368                    | A               |
| 1322.3515                          | 17.6559                   | A               |
| 1430.8667                          | 12.8438                   | A               |
| 1512.3123                          | 105.7016                  | A               |
| 2239.7044                          | 8.8600                    | A               |
| 3127.9513                          | 0.2314                    | A               |
| 3129.1300                          | 4.5308                    | A               |
| 3210.2488                          | 0.7549                    | A               |
| 3495.6150                          | 72.6217                   | A               |

**Table S.108** B3LYP/6-31G\* (unscaled) Computed Vibrational Frequencies and Intensities

**4-thiabicyclo[3.1.0]hexa-2,5-diene (15)**

| Frequency (cm <sup>-1</sup> ) | Intensity (Km/mol) | Symmetry |
|-------------------------------|--------------------|----------|
| 267.7921                      | 5.3174             | A        |
| 330.6983                      | 6.1987             | A        |
| 505.6039                      | 5.7910             | A        |
| 545.4197                      | 2.4363             | A        |
| 604.6023                      | 15.1090            | A        |
| 626.4690                      | 33.7196            | A        |
| 703.4525                      | 28.6051            | A        |
| 728.8625                      | 43.6012            | A        |
| 806.9800                      | 30.7263            | A        |
| 810.8157                      | 8.8798             | A        |
| 904.7869                      | 2.4901             | A        |
| 961.4174                      | 2.7801             | A        |
| 1004.5923                     | 1.8446             | A        |
| 1036.9201                     | 20.0388            | A        |
| 1114.6529                     | 5.3037             | A        |
| 1146.7939                     | 0.8737             | A        |
| 1302.9820                     | 4.6975             | A        |
| 1340.4968                     | 5.6335             | A        |
| 1588.5295                     | 9.7375             | A        |
| 1735.9352                     | 29.4007            | A        |
| 3091.4112                     | 56.2736            | A        |
| 3200.7944                     | 6.7057             | A        |
| 3243.1264                     | 3.8712             | A        |
| 3268.0711                     | 1.1603             | A        |



**Table S.109** B3LYP/6-31G\* (unscaled) Computed Vibrational Frequencies and Intensities

**(s-Z)-E-pent-2-en-4-ynal (16)**

| Frequency (cm <sup>-1</sup> ) | Intensity (Km/mol) | Symmetry |
|-------------------------------|--------------------|----------|
| 140.0421                      | 0.1208             | A''      |
| 146.4983                      | 1.8962             | A'       |
| 224.2771                      | 9.2594             | A''      |
| 271.2857                      | 6.3504             | A'       |
| 451.9460                      | 0.9043             | A''      |
| 517.6884                      | 2.0939             | A'       |
| 616.5676                      | 49.1881            | A'       |
| 628.7955                      | 42.1807            | A''      |
| 729.1429                      | 57.2711            | A'       |
| 850.1561                      | 2.7060             | A''      |
| 984.0504                      | 52.9424            | A'       |
| 1012.4862                     | 28.1649            | A''      |
| 1032.7158                     | 3.061              | A''      |
| 1073.2936                     | 4.3842             | A'       |
| 1302.5823                     | 45.3873            | A'       |
| 1325.4820                     | 8.7816             | A'       |
| 1445.1690                     | 7.1146             | A'       |
| 1656.5550                     | 229.3551           | A'       |
| 1790.4961                     | 127.2157           | A'       |
| 2216.8698                     | 16.2175            | A'       |
| 2940.3429                     | 178.4587           | A'       |
| 3169.1836                     | 0.0529             | A'       |
| 3202.2933                     | 7.5349             | A'       |
| 3492.6068                     | 67.0650            | A'       |

**Table S.110** B3LYP/6-31G\* (unscaled) Computed Vibrational Frequencies and Intensities

**(s-E)-E-pent-2-en-4-ynal (16)**

| Frequency (cm <sup>-1</sup> ) | Intensity (Km/mol) | Symmetry |
|-------------------------------|--------------------|----------|
| 126.2381                      | 0.9190             | A''      |
| 138.7480                      | 2.9319             | A'       |
| 232.4875                      | 8.2971             | A''      |
| 323.5595                      | 12.8641            | A'       |
| 476.1565                      | 0.0243             | A''      |
| 478.0668                      | 1.8233             | A'       |
| 598.5769                      | 9.4822             | A'       |
| 624.4967                      | 42.2101            | A''      |
| 628.7080                      | 47.6258            | A'       |
| 857.7822                      | 0.5969             | A''      |
| 1000.5995                     | 33.9012            | A''      |
| 1028.4981                     | 3.0892             | A''      |
| 1047.4066                     | 5.2321             | A'       |
| 1145.5134                     | 138.7691           | A'       |
| 1262.7693                     | 0.4024             | A'       |
| 1334.9790                     | 6.1120             | A'       |
| 1436.2679                     | 0.6909             | A'       |
| 1674.9334                     | 52.9233            | A'       |
| 1793.1451                     | 303.9245           | A'       |
| 2219.9754                     | 16.5428            | A'       |
| 2900.7039                     | 117.6071           | A'       |
| 3144.2873                     | 5.8488             | A'       |
| 3216.2585                     | 1.8512             | A'       |
| 3491.6830                     | 68.8304            | A'       |

**Table S.111** B3LYP/6-31G\* (unscaled) Computed Vibrational Frequencies and Intensities

**(s-Z)-Z-pent-2-en-4-ynal (17)**

| Frequency (cm <sup>-1</sup> ) | Intensity (Km/mol) | Symmetry |
|-------------------------------|--------------------|----------|
| 120.2705                      | 8.8031             | A''      |
| 142.1430                      | 3.6717             | A'       |
| 267.4848                      | 1.7523             | A'       |
| 298.2561                      | 0.0211             | A''      |
| 469.5454                      | 9.4160             | A''      |
| 515.0672                      | 12.5448            | A'       |
| 614.1571                      | 51.5521            | A'       |
| 652.0249                      | 42.4449            | A''      |
| 785.1828                      | 12.4465            | A''      |
| 842.4305                      | 2.9959             | A'       |
| 920.7101                      | 76.5299            | A'       |
| 993.3496                      | 0.0481             | A''      |
| 1020.4132                     | 5.0019             | A'       |
| 1027.2601                     | 5.1858             | A''      |
| 1252.8438                     | 8.4405             | A'       |
| 1431.8652                     | 6.1727             | A'       |
| 1459.7740                     | 18.2928            | A'       |
| 1644.0015                     | 144.4513           | A'       |
| 1795.0842                     | 76.5903            | A'       |
| 2213.8061                     | 25.9430            | A'       |
| 2921.1204                     | 193.2650           | A'       |
| 3155.8329                     | 2.8196             | A'       |
| 3193.0249                     | 14.3286            | A'       |
| 3494.7580                     | 55.6365            | A'       |

**Table S.112** B3LYP/6-31G\* (unscaled) Computed Vibrational Frequencies and Intensities

**(s-E)-Z-pent-2-en-4-ynal (17)**

| Frequency (cm <sup>-1</sup> ) | Intensity (Km/mol) | Symmetry |
|-------------------------------|--------------------|----------|
| 135.9469                      | 1.6544             | A'       |
| 153.4572                      | 6.1021             | A''      |
| 267.0435                      | 1.3114             | A''      |
| 317.2154                      | 12.2995            | A'       |
| 480.1791                      | 4.9391             | A'       |
| 484.8071                      | 8.4698             | A''      |
| 626.4132                      | 46.7011            | A''      |
| 634.2116                      | 43.6891            | A'       |
| 709.9447                      | 1.7825             | A'       |
| 806.7349                      | 22.3611            | A''      |
| 933.5544                      | 19.9797            | A'       |
| 1009.5120                     | 0.2373             | A''      |
| 1028.3629                     | 2.5254             | A''      |
| 1125.4295                     | 43.0638            | A'       |
| 1236.5934                     | 22.0665            | A'       |
| 1394.3473                     | 6.5193             | A'       |
| 1449.9965                     | 6.5841             | A'       |
| 1657.5144                     | 24.2745            | A'       |
| 1785.3771                     | 241.1509           | A'       |
| 2216.0511                     | 9.9396             | A'       |
| 2960.3515                     | 53.2327            | A'       |
| 3165.5829                     | 4.0445             | A'       |
| 3212.7588                     | 3.8731             | A'       |
| 3492.8776                     | 66.7394            | A'       |

**Table S.113** B3LYP/6-31G\* (unscaled) Computed Vibrational Frequencies and Intensities

**propargyl ketene (18)**

| <b>Frequency (cm<sup>-1</sup>)</b> | <b>Intensity (Km/mol)</b> | <b>Symmetry</b> |
|------------------------------------|---------------------------|-----------------|
| 53.2345                            | 0.7321                    | A               |
| 179.5269                           | 1.1953                    | A               |
| 212.7502                           | 2.6663                    | A               |
| 333.5144                           | 2.1207                    | A               |
| 469.5441                           | 14.4606                   | A               |
| 520.2441                           | 4.0194                    | A               |
| 579.1460                           | 41.1375                   | A               |
| 604.0994                           | 48.4077                   | A               |
| 620.0565                           | 37.4139                   | A               |
| 640.3155                           | 20.8690                   | A               |
| 895.4473                           | 6.1617                    | A               |
| 958.2668                           | 6.0746                    | A               |
| 1033.3068                          | 14.9841                   | A               |
| 1156.6894                          | 1.7458                    | A               |
| 1239.0005                          | 4.1715                    | A               |
| 1342.2090                          | 39.6794                   | A               |
| 1437.5749                          | 5.7483                    | A               |
| 1496.2695                          | 4.2126                    | A               |
| 2228.7130                          | 662.5854                  | A               |
| 2241.9015                          | 24.9702                   | A               |
| 3030.7101                          | 20.3332                   | A               |
| 3074.4988                          | 8.9207                    | A               |
| 3219.1862                          | 8.6421                    | A               |
| 3495.3174                          | 55.8752                   | A               |

**Table S.114** B3LYP/6-31G\* (unscaled) Computed Vibrational Frequencies and Intensities

**(*s-Z*)-(α-formyl)methylenecyclopropene (19)**

| Frequency (cm <sup>-1</sup> ) | Intensity (Km/mol) | Symmetry |
|-------------------------------|--------------------|----------|
| 136.8213                      | 8.1545             | A'       |
| 180.2756                      | 3.6383             | A''      |
| 246.8634                      | 14.3640            | A''      |
| 392.1039                      | 2.1273             | A'       |
| 498.9675                      | 4.8649             | A''      |
| 719.3387                      | 51.5021            | A'       |
| 752.4857                      | 47.0178            | A''      |
| 789.6789                      | 22.8471            | A''      |
| 864.0791                      | 0.8649             | A'       |
| 926.6929                      | 0.3477             | A''      |
| 971.0256                      | 2.6297             | A'       |
| 992.5756                      | 28.5340            | A'       |
| 1026.3594                     | 3.1327             | A''      |
| 1086.3757                     | 7.7068             | A'       |
| 1136.3259                     | 39.5112            | A'       |
| 1392.0914                     | 21.3319            | A'       |
| 1444.6763                     | 6.6258             | A'       |
| 1568.5299                     | 223.9695           | A'       |
| 1744.1227                     | 315.4390           | A'       |
| 1834.5703                     | 220.8581           | A'       |
| 2898.9783                     | 212.4197           | A'       |
| 3202.7774                     | 11.4735            | A'       |
| 3278.6264                     | 2.6719             | A'       |
| 3323.8406                     | 4.7007             | A'       |

**Table S.115** B3LYP/6-31G\* (unscaled) Computed Vibrational Frequencies and Intensities

**(*s-E*)-(α-formyl)methylenecyclopropene (19)**

| Frequency (cm <sup>-1</sup> ) | Intensity (Km/mol) | Symmetry |
|-------------------------------|--------------------|----------|
| 146.1791                      | 0.3891             | A''      |
| 160.5009                      | 0.7763             | A'       |
| 289.3906                      | 4.0399             | A''      |
| 462.9068                      | 25.0986            | A'       |
| 472.7502                      | 15.0159            | A''      |
| 504.8372                      | 0.4857             | A'       |
| 730.5565                      | 36.6097            | A'       |
| 832.9059                      | 35.9903            | A''      |
| 875.3525                      | 8.9669             | A''      |
| 921.9663                      | 0.2336             | A'       |
| 947.1219                      | 2.2653             | A''      |
| 1021.2407                     | 1.7506             | A'       |
| 1050.5802                     | 20.7167            | A''      |
| 1121.1117                     | 19.2963            | A'       |
| 1170.9502                     | 109.7027           | A'       |
| 1320.9771                     | 1.8806             | A'       |
| 1448.6383                     | 16.3587            | A'       |
| 1594.5773                     | 131.0810           | A'       |
| 1779.5883                     | 531.1781           | A'       |
| 1824.6984                     | 154.9566           | A'       |
| 2860.3484                     | 122.0688           | A'       |
| 3207.1659                     | 4.5146             | A'       |
| 3276.5067                     | 3.0018             | A'       |
| 3314.9490                     | 4.9691             | A'       |

**Table S.116** B3LYP/6-31G\* (unscaled) Computed Vibrational Frequencies and Intensities

**4-oxa-cyclohexa-1,2,4-triene (20)**

| <b>Frequency (cm<sup>-1</sup>)</b> | <b>Intensity (Km/mol)</b> | <b>Symmetry</b> |
|------------------------------------|---------------------------|-----------------|
| 248.9299                           | 48.2386                   | A               |
| 406.6117                           | 6.5075                    | A               |
| 559.1819                           | 27.8678                   | A               |
| 605.0359                           | 23.3726                   | A               |
| 658.7406                           | 22.2755                   | A               |
| 784.8191                           | 22.8614                   | A               |
| 830.2104                           | 15.3764                   | A               |
| 899.5470                           | 19.9317                   | A               |
| 920.4787                           | 20.5335                   | A               |
| 939.4773                           | 20.4667                   | A               |
| 1001.2944                          | 27.2957                   | A               |
| 1063.4409                          | 3.5709                    | A               |
| 1075.7982                          | 6.2206                    | A               |
| 1197.3030                          | 22.5968                   | A               |
| 1251.6667                          | 5.2670                    | A               |
| 1369.9190                          | 5.3480                    | A               |
| 1455.1897                          | 7.8989                    | A               |
| 1464.9349                          | 36.2807                   | A               |
| 1513.1290                          | 63.3784                   | A               |
| 1659.7514                          | 95.4252                   | A               |
| 3131.0151                          | 36.0057                   | A               |
| 3199.8172                          | 13.0120                   | A               |
| 3221.2075                          | 20.6224                   | A               |
| 3245.6705                          | 4.0732                    | A               |



**Table S.117** B3LYP/6-31G\* (unscaled) Computed Vibrational Frequencies and Intensities

**2-ethynylcyclopropanone (21)**

| Frequency (cm <sup>-1</sup> ) | Intensity (Km/mol) | Symmetry |
|-------------------------------|--------------------|----------|
| 118.2940                      | 2.4019             | A        |
| 193.9604                      | 1.0401             | A        |
| 349.5135                      | 4.7454             | A        |
| 415.7740                      | 0.5049             | A        |
| 491.8777                      | 6.3414             | A        |
| 559.8702                      | 22.2428            | A        |
| 579.3170                      | 30.4424            | A        |
| 644.4178                      | 43.7529            | A        |
| 699.2489                      | 6.4151             | A        |
| 804.0236                      | 22.0010            | A        |
| 831.4665                      | 10.2700            | A        |
| 970.2859                      | 125.2053           | A        |
| 1056.3484                     | 20.5733            | A        |
| 1076.2142                     | 9.8706             | A        |
| 1098.3476                     | 6.1566             | A        |
| 1109.8581                     | 5.7188             | A        |
| 1333.8925                     | 1.3511             | A        |
| 1440.5205                     | 6.9172             | A        |
| 1959.3309                     | 322.7898           | A        |
| 2237.1948                     | 8.9872             | A        |
| 3134.4296                     | 3.7286             | A        |
| 3135.3155                     | 3.2077             | A        |
| 3222.6278                     | 0.5927             | A        |
| 3495.5387                     | 71.0680            | A        |

**Table S.118** B3LYP/6-31G\* (unscaled) Computed Vibrational Frequencies and Intensities

**(s-Z)-2-furyl carbene (triplet) (22)**

| Frequency (cm <sup>-1</sup> ) | Intensity (Km/mol) | Symmetry |
|-------------------------------|--------------------|----------|
| 250.8064                      | 2.4684             | A''      |
| 353.7840                      | 4.6285             | A'       |
| 393.7740                      | 50.8312            | A''      |
| 574.9451                      | 5.9102             | A''      |
| 649.4992                      | 0.1996             | A''      |
| 704.4588                      | 2.5517             | A'       |
| 707.4175                      | 34.0121            | A''      |
| 751.5593                      | 22.7070            | A''      |
| 829.2771                      | 16.4733            | A'       |
| 864.4375                      | 1.5940             | A''      |
| 887.0370                      | 6.8136             | A'       |
| 902.8122                      | 16.6826            | A'       |
| 1042.6724                     | 18.7904            | A'       |
| 1122.9069                     | 4.0823             | A'       |
| 1183.2791                     | 23.8907            | A'       |
| 1199.1987                     | 14.2740            | A'       |
| 1328.7676                     | 6.2954             | A'       |
| 1411.3550                     | 1.4725             | A'       |
| 1463.3999                     | 3.0982             | A'       |
| 1550.1465                     | 6.9466             | A'       |
| 3264.3045                     | 2.7171             | A'       |
| 3280.0413                     | 0.8495             | A'       |
| 3297.0073                     | 0.9598             | A'       |
| 3308.1484                     | 2.3686             | A'       |

**Table S.119** B3LYP/6-31G\* (unscaled) Computed Vibrational Frequencies and Intensities

**(s-Z)-2-furyl carbene (singlet) (22)**

| Frequency (cm <sup>-1</sup> ) | Intensity (Km/mol) | Symmetry |
|-------------------------------|--------------------|----------|
| 227.2654                      | 0.3118             | A''      |
| 375.1207                      | 13.0064            | A'       |
| 483.7331                      | 1.1038             | A''      |
| 629.0945                      | 5.5878             | A''      |
| 645.4633                      | 8.2596             | A'       |
| 745.3974                      | 13.1390            | A'       |
| 794.7456                      | 2.7285             | A''      |
| 814.0636                      | 78.7819            | A''      |
| 894.8558                      | 15.7301            | A'       |
| 919.3408                      | 0.9139             | A''      |
| 949.1199                      | 2.2238             | A''      |
| 1016.3512                     | 30.6832            | A'       |
| 1063.3078                     | 5.9274             | A'       |
| 1122.4535                     | 24.8743            | A'       |
| 1142.0766                     | 2.0772             | A'       |
| 1237.7969                     | 26.1104            | A'       |
| 1359.6187                     | 14.5566            | A'       |
| 1460.0156                     | 158.4865           | A'       |
| 1496.8366                     | 13.6779            | A'       |
| 1613.5297                     | 63.5868            | A'       |
| 3023.7744                     | 72.2026            | A'       |
| 3246.9002                     | 3.2706             | A'       |
| 3274.3439                     | 0.8905             | A'       |
| 3287.6714                     | 0.7742             | A'       |

**Table S.120** B3LYP/6-31G\* (unscaled) Computed Vibrational Frequencies and Intensities

**(*s-E*)-2-furyl carbene (triplet) (22)**

| Frequency (cm <sup>-1</sup> ) | Intensity (Km/mol) | Symmetry |
|-------------------------------|--------------------|----------|
| 255.5985                      | 4.1001             | A''      |
| 362.5039                      | 4.5723             | A'       |
| 415.8359                      | 28.6552            | A''      |
| 577.4798                      | 7.7708             | A''      |
| 655.2127                      | 0.0481             | A''      |
| 710.4745                      | 1.4475             | A'       |
| 710.7934                      | 42.7340            | A''      |
| 741.2464                      | 24.7221            | A''      |
| 804.6540                      | 23.5612            | A'       |
| 860.3853                      | 1.5121             | A''      |
| 887.4626                      | 6.4402             | A'       |
| 939.1879                      | 15.1278            | A'       |
| 1044.0301                     | 21.1842            | A'       |
| 1126.0918                     | 3.6914             | A'       |
| 1190.4175                     | 18.6569            | A'       |
| 1211.3437                     | 11.6238            | A'       |
| 1330.1588                     | 6.3714             | A'       |
| 1415.8119                     | 1.4542             | A'       |
| 1447.0539                     | 2.5990             | A'       |
| 1547.3601                     | 8.8295             | A'       |
| 3262.1185                     | 2.8009             | A'       |
| 3278.3058                     | 2.5990             | A'       |
| 3299.5668                     | 8.8295             | A'       |
| 3304.6283                     | 2.8009             | A'       |

**Table S.121** B3LYP/6-31G\* (unscaled) Computed Vibrational Frequencies and Intensities

**(*s-E*)-2-furyl carbene (singlet) (22)**

| Frequency (cm <sup>-1</sup> ) | Intensity (Km/mol) | Symmetry |
|-------------------------------|--------------------|----------|
| 209.4108                      | 6.2055             | A''      |
| 402.5419                      | 6.7976             | A'       |
| 496.8343                      | 51.2663            | A''      |
| 644.2936                      | 0.0951             | A''      |
| 706.7343                      | 3.7559             | A'       |
| 778.3044                      | 7.6397             | A''      |
| 793.6735                      | 17.4552            | A'       |
| 802.3143                      | 40.1115            | A''      |
| 894.9587                      | 13.8230            | A'       |
| 914.1238                      | 0.4505             | A''      |
| 935.6967                      | 0.7982             | A''      |
| 1019.4621                     | 22.3307            | A'       |
| 1076.4437                     | 49.0444            | A'       |
| 1137.2593                     | 3.0767             | A'       |
| 1194.1875                     | 22.5314            | A'       |
| 1238.0298                     | 15.6712            | A'       |
| 1360.0333                     | 15.9717            | A'       |
| 1450.6927                     | 162.8699           | A'       |
| 1485.9295                     | 4.5141             | A'       |
| 1598.0842                     | 43.3995            | A'       |
| 2994.8455                     | 91.9093            | A'       |
| 3257.6721                     | 0.3398             | A'       |
| 3265.6963                     | 1.6596             | A'       |
| 3281.4441                     | 1.6777             | A'       |

**Table S.122** B3LYP/6-31G\* (unscaled) Computed Vibrational Frequencies and Intensities

**(s-Z)-3-furyl carbene (triplet) (23)**

| Frequency (cm <sup>-1</sup> ) | Intensity (Km/mol) | Symmetry |
|-------------------------------|--------------------|----------|
| 272.4610                      | 4.3693             | A''      |
| 337.7293                      | 5.9415             | A'       |
| 428.6168                      | 29.5463            | A''      |
| 577.5824                      | 11.6350            | A''      |
| 613.5692                      | 10.3667            | A''      |
| 663.6617                      | 5.3279             | A''      |
| 692.2183                      | 1.8025             | A'       |
| 764.5913                      | 48.8508            | A''      |
| 852.9238                      | 1.5578             | A''      |
| 853.5562                      | 1.5297             | A'       |
| 878.4461                      | 27.8103            | A'       |
| 992.7920                      | 6.4094             | A'       |
| 1055.5830                     | 28.0826            | A'       |
| 1111.6178                     | 12.5731            | A'       |
| 1207.0684                     | 39.4959            | A'       |
| 1250.5499                     | 4.7002             | A'       |
| 1339.9183                     | 0.9642             | A'       |
| 1356.7244                     | 9.3020             | A'       |
| 1483.8085                     | 8.5754             | A'       |
| 1591.4407                     | 9.0902             | A'       |
| 3269.0373                     | 2.7983             | A'       |
| 3275.7900                     | 0.5302             | A'       |
| 3300.3820                     | 1.7569             | A'       |
| 3304.8487                     | 0.4371             | A'       |

**Table S.123** B3LYP/6-31G\* (unscaled) Computed Vibrational Frequencies and Intensities

**(s-Z)-3-furyl carbene (singlet) (23)**

| Frequency (cm <sup>-1</sup> ) | Intensity (Km/mol) | Symmetry |
|-------------------------------|--------------------|----------|
| 171.9752                      | 19.9192            | A''      |
| 355.8628                      | 15.8110            | A'       |
| 462.3785                      | 48.0999            | A''      |
| 642.0724                      | 10.6500            | A''      |
| 681.1990                      | 1.5497             | A''      |
| 687.9483                      | 5.3648             | A'       |
| 761.1125                      | 23.9133            | A''      |
| 866.6188                      | 17.7558            | A'       |
| 868.2995                      | 17.8963            | A''      |
| 897.9915                      | 6.7453             | A''      |
| 985.2046                      | 8.2998             | A'       |
| 999.9655                      | 6.3014             | A'       |
| 1105.9919                     | 4.0279             | A'       |
| 1124.7083                     | 24.1882            | A'       |
| 1199.7729                     | 145.7700           | A'       |
| 1271.9939                     | 0.7536             | A'       |
| 1367.9329                     | 5.7886             | A'       |
| 1401.9734                     | 5.1642             | A'       |
| 1524.3782                     | 138.0744           | A'       |
| 1589.3271                     | 2.3966             | A'       |
| 2913.6583                     | 133.8775           | A'       |
| 3278.5076                     | 0.6044             | A'       |
| 3282.6166                     | 0.8365             | A'       |
| 3315.4997                     | 0.5115             | A'       |

**Table S.124** B3LYP/6-31G\* (unscaled) Computed Vibrational Frequencies and Intensities

**(*s-E*)-3-furyl carbene (triplet) (23)**

| Frequency (cm <sup>-1</sup> ) | Intensity (Km/mol) | Symmetry |
|-------------------------------|--------------------|----------|
| 278.8254                      | 0.2919             | A''      |
| 336.6509                      | 0.4229             | A'       |
| 380.9679                      | 28.9464            | A''      |
| 580.9075                      | 12.7767            | A''      |
| 610.5475                      | 5.9562             | A''      |
| 671.8706                      | 5.3637             | A''      |
| 696.3092                      | 1.8621             | A'       |
| 759.0373                      | 55.4163            | A''      |
| 844.8439                      | 1.2696             | A''      |
| 857.3213                      | 33.9331            | A'       |
| 879.4840                      | 7.3233             | A'       |
| 980.7396                      | 1.1579             | A'       |
| 1056.6246                     | 30.5447            | A'       |
| 1113.0200                     | 11.8473            | A'       |
| 1210.5773                     | 29.6645            | A'       |
| 1252.1322                     | 8.5963             | A'       |
| 1336.1129                     | 5.8893             | A'       |
| 1353.8050                     | 5.8103             | A'       |
| 1496.0955                     | 12.7749            | A'       |
| 1589.6684                     | 8.2298             | A'       |
| 3272.2165                     | 2.8297             | A'       |
| 3274.4279                     | 1.3287             | A'       |
| 3299.7735                     | 2.1918             | A'       |
| 3306.5650                     | 0.0119             | A'       |



**Table S.125** B3LYP/6-31G\* (unscaled) Computed Vibrational Frequencies and Intensities

**(*s-E*)-3-furyl carbene (singlet) (23)**

| Frequency (cm <sup>-1</sup> ) | Intensity (Km/mol) | Symmetry |
|-------------------------------|--------------------|----------|
| 207.1103                      | 0.0147             | A''      |
| 350.2188                      | 7.5088             | A'       |
| 476.9788                      | 15.3098            | A''      |
| 639.2899                      | 14.4615            | A''      |
| 688.6728                      | 4.8387             | A'       |
| 699.7608                      | 29.0011            | A''      |
| 760.8670                      | 50.3192            | A''      |
| 865.0109                      | 19.5512            | A'       |
| 880.1838                      | 0.0068             | A''      |
| 890.7635                      | 12.9683            | A''      |
| 982.6692                      | 9.3569             | A'       |
| 999.5582                      | 9.2558             | A'       |
| 1095.9764                     | 10.0679            | A'       |
| 1127.7180                     | 5.8386             | A'       |
| 1199.2723                     | 123.0707           | A'       |
| 1260.3807                     | 2.9913             | A'       |
| 1371.5866                     | 7.2094             | A'       |
| 1389.6145                     | 5.1084             | A'       |
| 1538.0856                     | 149.5905           | A'       |
| 1592.0706                     | 3.8642             | A'       |
| 2934.5228                     | 125.0698           | A'       |
| 3271.6684                     | 0.3513             | A'       |
| 3295.1556                     | 0.9949             | A'       |
| 3308.2299                     | 1.3775             | A'       |

**Table S.126** B3LYP/6-31G\* (unscaled) Computed Vibrational Frequencies and Intensities

**2-oxabicyclo[3.1.0]hexa-3,5-diene (24)**

| <b>Frequency (cm<sup>-1</sup>)</b> | <b>Intensity (Km/mol)</b> | <b>Symmetry</b> |
|------------------------------------|---------------------------|-----------------|
| 318.2112                           | 8.1687                    | A               |
| 412.5504                           | 7.5841                    | A               |
| 531.5536                           | 14.5501                   | A               |
| 660.5663                           | 38.7793                   | A               |
| 691.0475                           | 34.8198                   | A               |
| 755.1214                           | 1.2951                    | A               |
| 773.5956                           | 91.3513                   | A               |
| 822.6357                           | 43.0682                   | A               |
| 837.7598                           | 4.3420                    | A               |
| 893.8253                           | 4.5480                    | A               |
| 989.5356                           | 5.0603                    | A               |
| 999.8441                           | 4.9892                    | A               |
| 1066.0503                          | 2.8851                    | A               |
| 1083.4689                          | 27.9670                   | A               |
| 1147.0900                          | 3.4644                    | A               |
| 1197.0171                          | 29.0645                   | A               |
| 1310.6128                          | 7.5832                    | A               |
| 1373.3564                          | 3.5091                    | A               |
| 1561.0755                          | 53.2297                   | A               |
| 1738.5660                          | 36.8913                   | A               |
| 3155.7085                          | 40.2948                   | A               |
| 3245.6127                          | 1.7165                    | A               |
| 3255.8748                          | 1.7620                    | A               |
| 3283.3830                          | 5.0194                    | A               |

**Table S.127** B3LYP/6-31G\* (unscaled) Computed Vibrational Frequencies and Intensities

**4-oxabicyclo[3.1.0]hexa-2,5-diene (25)**

| <b>Frequency (cm<sup>-1</sup>)</b> | <b>Intensity (Km/mol)</b> | <b>Symmetry</b> |
|------------------------------------|---------------------------|-----------------|
| 299.9406                           | 5.8598                    | A               |
| 351.0738                           | 62.0938                   | A               |
| 537.1570                           | 9.1042                    | A               |
| 635.4606                           | 39.2655                   | A               |
| 747.7441                           | 27.3076                   | A               |
| 770.9878                           | 24.4220                   | A               |
| 802.5328                           | 18.4349                   | A               |
| 848.7503                           | 12.2183                   | A               |
| 882.1933                           | 18.0170                   | A               |
| 928.0299                           | 36.5749                   | A               |
| 975.3585                           | 14.4543                   | A               |
| 1000.4389                          | 42.6129                   | A               |
| 1025.3728                          | 17.6140                   | A               |
| 1036.9804                          | 5.9799                    | A               |
| 1160.3671                          | 13.7365                   | A               |
| 1178.9378                          | 7.0788                    | A               |
| 1295.1351                          | 6.3230                    | A               |
| 1349.7956                          | 5.2435                    | A               |
| 1595.7989                          | 24.1955                   | A               |
| 1742.6551                          | 93.0955                   | A               |
| 3136.1499                          | 38.1804                   | A               |
| 3244.2705                          | 4.8265                    | A               |
| 3247.1434                          | 1.8845                    | A               |
| 3285.4659                          | 2.5205                    | A               |

**Table S.128** B3LYP/6-31G\* (unscaled) Computed Vibrational Frequencies and Intensities

**(s-Z)-penta-2,3,4-trienal (26)**

| Frequency (cm <sup>-1</sup> ) | Intensity (Km/mol) | Symmetry |
|-------------------------------|--------------------|----------|
| 101.5660                      | 4.0447             | A'       |
| 152.0528                      | 10.3354            | A''      |
| 267.2152                      | 0.0931             | A''      |
| 279.2958                      | 2.9970             | A'       |
| 412.1453                      | 2.8860             | A'       |
| 453.5928                      | 1.4142             | A''      |
| 643.0065                      | 1.5682             | A''      |
| 733.7557                      | 53.3868            | A'       |
| 847.0247                      | 15.5231            | A''      |
| 874.3865                      | 3.0627             | A'       |
| 910.0444                      | 43.8710            | A''      |
| 1023.1604                     | 3.7007             | A''      |
| 1043.9750                     | 1043.9750          | A'       |
| 1046.7968                     | 1046.7968          | A'       |
| 1043.9750                     | 1329.7361          | A'       |
| 1440.7792                     | 16.8161            | A'       |
| 1473.3356                     | 17.2048            | A'       |
| 1680.6887                     | 116.8208           | A'       |
| 1790.0970                     | 134.8376           | A'       |
| 2211.4510                     | 46.0476            | A'       |
| 2926.1892                     | 220.6286           | A'       |
| 3149.3387                     | 1.1020             | A'       |
| 3158.7282                     | 9.9606             | A'       |
| 3225.8452                     | 1.8487             | A'       |

**Table S.129** B3LYP/6-31G\* (unscaled) Computed Vibrational Frequencies and Intensities

**(s-E)-penta-2,3,4-trienal (26)**

| Frequency (cm <sup>-1</sup> ) | Intensity (Km/mol) | Symmetry |
|-------------------------------|--------------------|----------|
| 109.7651                      | 0.4984             | A'       |
| 119.2197                      | 4.0026             | A''      |
| 269.8093                      | 6.3067             | A''      |
| 308.5272                      | 9.4261             | A'       |
| 452.3181                      | 26.6358            | A'       |
| 495.4880                      | 2.8964             | A''      |
| 517.4076                      | 0.4497             | A'       |
| 623.2963                      | 0.1494             | A''      |
| 873.9906                      | 19.6719            | A''      |
| 904.5470                      | 45.4524            | A''      |
| 959.3689                      | 1.1824             | A'       |
| 1015.6132                     | 1.6290             | A''      |
| 1044.7972                     | 0.7771             | A'       |
| 1119.6195                     | 141.5806           | A'       |
| 1279.2943                     | 0.1343             | A'       |
| 1421.3334                     | 2.2438             | A'       |
| 1474.3456                     | 1.9843             | A'       |
| 1687.2202                     | 30.5462            | A'       |
| 1779.8731                     | 330.7272           | A'       |
| 2209.3391                     | 23.8023            | A'       |
| 2942.5095                     | 88.1665            | A'       |
| 3149.9669                     | 0.9912             | A'       |
| 3177.3620                     | 1.7024             | A'       |
| 3225.9991                     | 1.7521             | A'       |

**Table S.130** B3LYP/6-31G\* (unscaled) Computed Vibrational Frequencies and Intensities

**(s-E)-pent-1-en-4-yn-3-one (27)**

| Frequency (cm <sup>-1</sup> ) | Intensity (Km/mol) | Symmetry |
|-------------------------------|--------------------|----------|
| 94.1312                       | 0.4532             | A''      |
| 151.9578                      | 2.9999             | A'       |
| 263.4129                      | 0.4532             | A''      |
| 299.4949                      | 6.0858             | A'       |
| 510.1140                      | 0.5265             | A'       |
| 519.8281                      | 6.0858             | A''      |
| 594.4999                      | 4.0105             | A'       |
| 623.6813                      | 48.7276            | A'       |
| 670.0306                      | 27.9763            | A''      |
| 783.3988                      | 2.0461             | A'       |
| 813.5353                      | 30.6722            | A''      |
| 1000.2521                     | 12.9588            | A''      |
| 1028.5886                     | 27.6403            | A''      |
| 1087.7786                     | 3.3913             | A'       |
| 1137.1371                     | 248.9918           | A'       |
| 1332.6184                     | 3.0883             | A'       |
| 1449.9833                     | 69.1188            | A'       |
| 1683.3864                     | 84.3484            | A'       |
| 1751.9426                     | 104.2145           | A'       |
| 2212.9267                     | 78.7533            | A'       |
| 3175.8091                     | 5.3028             | A'       |
| 3198.0060                     | 6.5413             | A'       |
| 3267.2070                     | 2.8284             | A'       |
| 3487.8040                     | 44.4006            | A'       |

**Table S.131** B3LYP/6-31G\* (unscaled) Computed Vibrational Frequencies and Intensities

**1-ethynyl-3-oxacyclobutene (28)**

| Frequency (cm <sup>-1</sup> ) | Intensity (Km/mol) | Symmetry |
|-------------------------------|--------------------|----------|
| 184.2333                      | 0.3917             | A'       |
| 186.8109                      | 0.2472             | A''      |
| 434.1234                      | 26.8476            | A''      |
| 493.9701                      | 56.7157            | A''      |
| 528.9462                      | 6.9423             | A'       |
| 537.4421                      | 3.0110             | A''      |
| 625.3355                      | 0.5693             | A'       |
| 647.3739                      | 41.4139            | A'       |
| 869.4109                      | 9.3420             | A''      |
| 891.8286                      | 33.1472            | A'       |
| 979.6936                      | 53.9326            | A'       |
| 1017.5406                     | 5.7056             | A''      |
| 1076.7982                     | 115.8402           | A'       |
| 1117.8398                     | 3.7344             | A''      |
| 1202.5518                     | 6.3455             | A'       |
| 1250.2253                     | 14.4330            | A'       |
| 1340.0727                     | 48.5890            | A'       |
| 1512.6511                     | 0.1523             | A'       |
| 1677.2678                     | 27.3533            | A'       |
| 2221.8396                     | 16.7904            | A'       |
| 3097.6750                     | 24.8261            | A'       |
| 3162.9272                     | 16.2266            | A''      |
| 3252.4264                     | 6.2511             | A'       |
| 3496.5332                     | 84.7839            | A'       |

**Table S.132** B3LYP/6-31G\* (unscaled) Computed Vibrational Frequencies and Intensities

**4-ethynyl-3-oxacyclobutene (29)**

| Frequency (cm <sup>-1</sup> ) | Intensity (Km/mol) | Symmetry |
|-------------------------------|--------------------|----------|
| 170.0676                      | 3.0628             | A        |
| 189.3397                      | 2.6957             | A        |
| 383.8833                      | 4.5503             | A        |
| 503.5885                      | 6.4126             | A        |
| 577.3276                      | 10.3432            | A        |
| 604.6351                      | 46.5555            | A        |
| 658.4244                      | 36.5690            | A        |
| 679.0304                      | 39.4659            | A        |
| 658.4244                      | 45.8372            | A        |
| 884.9699                      | 6.8463             | A        |
| 914.0398                      | 37.4121            | A        |
| 948.7142                      | 3.6463             | A        |
| 1040.9180                     | 80.3903            | A        |
| 1062.5058                     | 20.0064            | A        |
| 1172.1779                     | 12.6956            | A        |
| 1186.6629                     | 5.9555             | A        |
| 1306.2888                     | 15.0250            | A        |
| 1354.0428                     | 28.5289            | A        |
| 1647.2004                     | 19.4152            | A        |
| 2242.1288                     | 3.3973             | A        |
| 3088.3746                     | 14.8574            | A        |
| 3246.7948                     | 10.6404            | A        |
| 3314.0969                     | 2.3386             | A        |
| 3494.6787                     | 57.2626            | A        |



**Table S.133** B3LYP/6-31G\* (unscaled) Computed Vibrational Frequencies and Intensities

**allenyl ethynyl ether (30)**

| Frequency (cm <sup>-1</sup> ) | Intensity (Km/mol) | Symmetry |
|-------------------------------|--------------------|----------|
| 36.5970                       | 0.1494             | A''      |
| 130.9412                      | 0.3866             | A'       |
| 242.0982                      | 0.2275             | A''      |
| 309.8126                      | 5.1223             | A''      |
| 397.7315                      | 25.2113            | A''      |
| 517.0980                      | 33.7940            | A''      |
| 538.4420                      | 3.2387             | A'       |
| 560.9143                      | 0.8834             | A'       |
| 610.6236                      | 0.0018             | A''      |
| 634.2227                      | 46.9326            | A'       |
| 862.4654                      | 16.8975            | A''      |
| 927.5205                      | 37.4873            | A'       |
| 980.3638                      | 90.2571            | A'       |
| 1041.9412                     | 0.1511             | A''      |
| 1125.4529                     | 66.8376            | A'       |
| 1217.4502                     | 267.3235           | A'       |
| 1387.2070                     | 97.7180            | A'       |
| 1512.1191                     | 41.1860            | A'       |
| 2092.1397                     | 47.7512            | A'       |
| 2293.0356                     | 253.9879           | A'       |
| 3134.4451                     | 13.2419            | A'       |
| 3202.8869                     | 4.3770             | A''      |
| 3214.3815                     | 6.4472             | A'       |
| 3514.3095                     | 123.6772           | A'       |

**Table S.134** B3LYP/6-31G\* (unscaled) Computed Vibrational Frequencies and Intensities

**ethynyl prop-2-ynyl ether (31)**

| Frequency (cm <sup>-1</sup> ) | Intensity (Km/mol) | Symmetry |
|-------------------------------|--------------------|----------|
| 52.0705                       | 0.2909             | A''      |
| 127.6538                      | 0.1612             | A'       |
| 228.8140                      | 1.9224             | A'       |
| 332.2239                      | 4.7107             | A''      |
| 404.0525                      | 29.9391            | A''      |
| 497.3133                      | 1.3522             | A'       |
| 524.7495                      | 26.9599            | A''      |
| 539.4418                      | 2.5877             | A'       |
| 602.6135                      | 51.3744            | A''      |
| 628.5964                      | 45.5111            | A'       |
| 675.0857                      | 38.6300            | A'       |
| 937.6435                      | 71.1976            | A'       |
| 995.7516                      | 16.3934            | A'       |
| 1028.3151                     | 1.9013             | A''      |
| 1142.0233                     | 224.5609           | A'       |
| 1257.5950                     | 2.1650             | A''      |
| 1412.8869                     | 83.9140            | A'       |
| 1519.6080                     | 1.8956             | A'       |
| 2254.9936                     | 19.8844            | A'       |
| 2286.1976                     | 152.7229           | A'       |
| 3048.8314                     | 16.5231            | A'       |
| 3089.7796                     | 15.0399            | A''      |
| 3493.6885                     | 58.0406            | A'       |
| 3514.6172                     | 98.2137            | A'       |

**Table S.135** B3LYP/6-31G\* (unscaled) Computed Vibrational Frequencies and Intensities

**ethynyl prop-1-ynyl ether (32)**

| Frequency (cm <sup>-1</sup> ) | Intensity (Km/mol) | Symmetry |
|-------------------------------|--------------------|----------|
| 14.3132                       | 0.1437             | A        |
| 94.0539                       | 1.1198             | A        |
| 225.0077                      | 1.9727             | A        |
| 261.3240                      | 2.2709             | A        |
| 370.5199                      | 0.3663             | A        |
| 380.7692                      | 2.9104             | A        |
| 389.3649                      | 9.6729             | A        |
| 537.6380                      | 40.7245            | A        |
| 541.6252                      | 0.1312             | A        |
| 623.4015                      | 47.5236            | A        |
| 755.0028                      | 4.7988             | A        |
| 1039.9591                     | 39.7180            | A        |
| 1072.7128                     | 4.0198             | A        |
| 1075.2056                     | 2.5737             | A        |
| 1298.6292                     | 204.7286           | A        |
| 1448.7811                     | 0.2789             | A        |
| 1507.9484                     | 6.4400             | A        |
| 1511.3199                     | 5.9081             | A        |
| 2300.3913                     | 205.0706           | A        |
| 2429.8571                     | 101.1048           | A        |
| 3044.2991                     | 28.8322            | A        |
| 3105.6670                     | 12.3432            | A        |
| 3108.3546                     | 10.9109            | A        |
| 3512.3237                     | 113.1782           | A        |

**Table S.136** B3LYP/6-31G\* (unscaled) Computed Vibrational Frequencies and Intensities

**3-cyclopropenyl ethynyl ether (33)**

| Frequency (cm <sup>-1</sup> ) | Intensity (Km/mol) | Symmetry |
|-------------------------------|--------------------|----------|
| 33.8054                       | 1.1429             | A''      |
| 146.6279                      | 1.3364             | A'       |
| 389.4523                      | 27.9199            | A''      |
| 393.6370                      | 7.3393             | A'       |
| 427.5257                      | 12.6923            | A''      |
| 521.8962                      | 19.1276            | A''      |
| 585.8935                      | 30.7133            | A'       |
| 616.3897                      | 27.4467            | A'       |
| 723.7522                      | 16.5804            | A'       |
| 810.3721                      | 177.6873           | A'       |
| 880.0576                      | 13.8749            | A''      |
| 897.0395                      | 1.9057             | A''      |
| 944.6464                      | 4.4094             | A'       |
| 1063.3535                     | 0.2187             | A''      |
| 1095.1086                     | 31.1132            | A''      |
| 1118.5769                     | 215.4399           | A'       |
| 1230.9305                     | 63.6170            | A'       |
| 1395.3817                     | 13.0893            | A'       |
| 1711.6367                     | 1711.6367          | A'       |
| 2277.6945                     | 2277.6945          | A'       |
| 3176.1842                     | 3176.1842          | A'       |
| 3271.4572                     | 3271.4572          | A''      |
| 3312.7290                     | 3312.7290          | A'       |
| 3515.7186                     | 3515.7186          | A'       |

**Table S.137** B3LYP/6-31G\* (unscaled) Computed Vibrational Frequencies and Intensities

**(3-thienyl)diazirine (34)**

| Frequency (cm <sup>-1</sup> ) | Intensity (Km/mol) | Symmetry |
|-------------------------------|--------------------|----------|
| 70.8257                       | 2.0157             | A        |
| 173.4147                      | 1.1082             | A        |
| 181.2356                      | 3.2427             | A        |
| 381.381                       | 0.4702             | A        |
| 413.1713                      | 0.3488             | A        |
| 473.4441                      | 0.1013             | A        |
| 623.9542                      | 2.8911             | A        |
| 661.7858                      | 15.8855            | A        |
| 683.6524                      | 0.461              | A        |
| 700.8897                      | 6.8471             | A        |
| 788.2523                      | 70.0383            | A        |
| 829.524                       | 6.1809             | A        |
| 838.2792                      | 0.1285             | A        |
| 864.8269                      | 19.275             | A        |
| 895.9402                      | 0.1544             | A        |
| 940.0085                      | 0.1459             | A        |
| 1022.516                      | 15.4933            | A        |
| 1076.968                      | 18.3512            | A        |
| 1124.423                      | 4.3806             | A        |
| 1209.302                      | 2.0435             | A        |
| 1283.128                      | 10.583             | A        |
| 1374.061                      | 1.2808             | A        |
| 1442.942                      | 0.7098             | A        |
| 1478.471                      | 6.0957             | A        |
| 1598.544                      | 4.1818             | A        |
| 1725.593                      | 80.793             | A        |
| 3196.93                       | 16.1864            | A        |
| 3235.217                      | 0.7262             | A        |
| 3265.97                       | 0.8283             | A        |
| 3274.022                      | 0.4813             | A        |

**Table S.138** B3LYP/6-31G\* (unscaled) Computed Vibrational Frequencies and Intensities

**6aH-thieno[2,3-c]pyrazole (35)**

| Frequency (cm <sup>-1</sup> ) | Intensity (Km/mol) | Symmetry |
|-------------------------------|--------------------|----------|
| 172.4527                      | 1.0932             | A        |
| 222.3073                      | 1.6106             | A        |
| 330.3839                      | 2.6176             | A        |
| 477.2338                      | 1.3077             | A        |
| 498.2226                      | 0.6028             | A        |
| 587.6961                      | 2.979              | A        |
| 629.0628                      | 15.6564            | A        |
| 698.3896                      | 12.5787            | A        |
| 730.051                       | 42.1873            | A        |
| 773.8213                      | 14.166             | A        |
| 804.9231                      | 8.8745             | A        |
| 850.5765                      | 35.1725            | A        |
| 914.8893                      | 7.0608             | A        |
| 920.583                       | 7.1356             | A        |
| 972.0091                      | 1.2647             | A        |
| 993.3452                      | 5.765              | A        |
| 999.0702                      | 6.4864             | A        |
| 1121.427                      | 2.074              | A        |
| 1150.675                      | 6.4007             | A        |
| 1178.019                      | 20.8616            | A        |
| 1244.983                      | 12.2076            | A        |
| 1308.828                      | 9.5803             | A        |
| 1343.425                      | 2.2514             | A        |
| 1453.294                      | 59.7512            | A        |
| 1559.038                      | 22.982             | A        |
| 1646.576                      | 23.4173            | A        |
| 3034.022                      | 5.1725             | A        |
| 3228.1                        | 0.458              | A        |
| 3245.878                      | 3.5153             | A        |
| 3274.762                      | 2.6236             | A        |

**Table S.139** B3LYP/6-31G\* (unscaled) Computed Vibrational Frequencies and Intensities

**3H-thieno[2,3-c]pyrazole (36)**

| Frequency (cm <sup>-1</sup> ) | Intensity (Km/mol) | Symmetry |
|-------------------------------|--------------------|----------|
| 203.727                       | 0.3664             | A        |
| 236.4425                      | 7.9875             | A        |
| 373.796                       | 1.6715             | A        |
| 430.1503                      | 1.0184             | A        |
| 505.8612                      | 1.2369             | A        |
| 559.9985                      | 0.0299             | A        |
| 582.2192                      | 1.4836             | A        |
| 652.6558                      | 11.4461            | A        |
| 730.0153                      | 33.9826            | A        |
| 733.6763                      | 6.0987             | A        |
| 837.0326                      | 5.7712             | A        |
| 844.1791                      | 10.9835            | A        |
| 882.9476                      | 2.3892             | A        |
| 922.1495                      | 0.9051             | A        |
| 959.2657                      | 37.1501            | A        |
| 1040.288                      | 9.2716             | A        |
| 1132.493                      | 5.4277             | A        |
| 1141.856                      | 2.9477             | A        |
| 1211.301                      | 29.5041            | A        |
| 1225.872                      | 11.8924            | A        |
| 1289.437                      | 9.9906             | A        |
| 1413.415                      | 34.6129            | A        |
| 1435.716                      | 20.0318            | A        |
| 1482.73                       | 21.4653            | A        |
| 1513.77                       | 11.6983            | A        |
| 1561.656                      | 1.8531             | A        |
| 3066.772                      | 1.8386             | A        |
| 3103.614                      | 1.6844             | A        |
| 3231.525                      | 4.0116             | A        |
| 3263.655                      | 1.0492             | A        |

**Table S.140** B3LYP/6-31G\* (unscaled) Computed Vibrational Frequencies and Intensities

**1*H*-thieno[2,3-*c*]pyrazole (37)**

| Frequency (cm <sup>-1</sup> ) | Intensity (Km/mol) | Symmetry |
|-------------------------------|--------------------|----------|
| 209.7183                      | 0.0031             | A''      |
| 262.0235                      | 0.0043             | A''      |
| 385.3046                      | 67.9332            | A'       |
| 392.8737                      | 2.549              | A'       |
| 498.819                       | 13.134             | A''      |
| 549.4503                      | 0.0112             | A''      |
| 592.8861                      | 0.1352             | A'       |
| 638.8059                      | 0.6337             | A''      |
| 676.1856                      | 60.4756            | A''      |
| 730.2446                      | 10.0355            | A'       |
| 742.5057                      | 13.6368            | A''      |
| 835.3389                      | 17.2918            | A'       |
| 860.7895                      | 14.0636            | A''      |
| 887.0491                      | 5.7503             | A'       |
| 965.1463                      | 40.8967            | A''      |
| 1072.243                      | 3.5198             | A'       |
| 1088.52                       | 11.4095            | A''      |
| 1138.42                       | 5.6422             | A'       |
| 1240.569                      | 3.057              | A'       |
| 1307.396                      | 2.5175             | A'       |
| 1315.562                      | 0.052              | A'       |
| 1411.764                      | 23.3756            | A'       |
| 1443.583                      | 12.3056            | A'       |
| 1498.762                      | 16.1824            | A'       |
| 1563.856                      | 14.0227            | A'       |
| 1583.467                      | 23.4015            | A'       |
| 3231.229                      | 3.9703             | A'       |
| 3264.277                      | 6.5793             | A'       |
| 3268.801                      | 1.7548             | A'       |
| 3679.895                      | 81.8305            | A'       |
